# Supplementary material
Source: PubMed Central journal article supplement (PMC5243118)

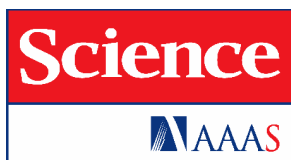

# Supplementary Materials for

## **Directed evolution of cytochrome c for carbon–silicon bond formation: Bringing silicon to life**

S. B. Jennifer Kan, Russell D. Lewis, Kai Chen, Frances H. Arnold\*

\*Corresponding author. E-mail: frances@cheme.caltech.edu

Published 25 November 2016, *Science* **354**, 1048 (2016)

DOI: 10.1126/science.aah6219

**This PDF file includes:**

|                                                                                         |        |
|-----------------------------------------------------------------------------------------|--------|
| I. Materials and Methods                                                                | 2      |
| II. General Procedures                                                                  | 3-6    |
| III. Supporting Tables S1 to S7 and Figs. S1 to S6                                      | 7-19   |
| IV. Substrate Synthesis and Characterization                                            | 20-27  |
| V. Synthesis and Characterization of Authentic Organosilicon Products                   | 28-33  |
| VI. Preparative-Scale Whole-Cell Biocatalytic Reaction                                  | 34     |
| VII. GC Standard Curves for Organosilicon Products                                      | 35-41  |
| III. Chiral SFC Traces for Racemic and Enzymatically Synthesized Organosilicon Products | 42-61  |
| IX. References                                                                          | 62-66  |
| X. NMR Spectra                                                                          | 67-111 |

## I. Materials and Methods

Unless otherwise noted, all chemicals and reagents for chemical reactions were obtained from commercial suppliers (Acros, Arch Bioscience, Fisher Scientific, Sigma-Aldrich, TCI America) and used without further purification. The following proteins were all purchased from Sigma-Aldrich: bovine serum albumin (BSA), cytochrome *c* (from bovine, equine heart and *S. cerevisiae*), peroxidase II (from horseradish), and catalase (from *C. glutamicum*). Silica gel chromatography purifications were carried out using AMD Silica Gel 60, 230-400 mesh.  $^1\text{H}$  and  $^{13}\text{C}$  NMR spectra were recorded on a Bruker Prodigy 400 MHz instrument and are internally referenced to the residual solvent peak (chloroform).  $^{29}\text{Si}$  NMR spectra were recorded on the same instrument and referenced to tetramethoxysilane ( $\delta -78.9$  ppm). Data for  $^1\text{H}$  NMR are reported in the conventional form: chemical shift ( $\delta$  ppm), multiplicity (s = singlet, d = doublet, t = triplet, q = quartet, hept = heptet, m = multiplet, br = broad, app = appears as), coupling constant (Hz), integration. Data for  $^{13}\text{C}$  and  $^{29}\text{Si}$  are reported in terms of chemical shift ( $\delta$  ppm). High-resolution mass spectra were obtained with a JEOL JMS-600H High Resolution Mass Spectrometer at the California Institute of Technology Mass Spectral Facility. Sonication was performed using a Qsonica Q500 sonicator. Chemical reactions were monitored using thin layer chromatography (Merck 60 silica gel plates) and a UV-lamp for visualization. Gas chromatography (GC) analyses were carried out using a Shimadzu GC-17A gas chromatograph, a FID detector, and J&W HP-5 (30 m x 0.32 mm, 0.25  $\mu\text{m}$  film; 90  $^\circ\text{C}$  hold 1 min, 90 to 110  $^\circ\text{C}$  at 15  $^\circ\text{C}/\text{min}$ , 110 to 280  $^\circ\text{C}$  at 60  $^\circ\text{C}/\text{min}$ , 280  $^\circ\text{C}$  hold 1 min, 6.2 min total). Analytical chiral supercritical fluid chromatography (SFC) was performed with a JACSO 2000 series instrument using *i*-PrOH and supercritical  $\text{CO}_2$  as the mobile phase, with visualization at 210 nm. The following chiral columns were used: Daicel Chiralpak IC, Chiralpak AD-H, or Chiralcel OD-H (4.6 mm x 25 cm).

Plasmid pET22 was used as a cloning vector, and cloning was performed using Gibson assembly (31). The cytochrome *c* maturation plasmid pEC86 (32) was used as part of a two-plasmid system to express prokaryotic cytochrome *c* proteins. Cells were grown using Luria-Bertani medium or HyperBroth (AthenaES) with 100  $\mu\text{g}/\text{mL}$  ampicillin and 20  $\mu\text{g}/\text{mL}$  chloramphenicol ( $\text{LB}_{\text{amp/chlor}}$  or  $\text{HB}_{\text{amp/chlor}}$ ). Cells without the pEC86 plasmid were grown with 100  $\mu\text{g}/\text{mL}$  ampicillin ( $\text{LB}_{\text{amp}}$  or  $\text{HB}_{\text{amp}}$ ). Primer sequences are available upon request. Electrocompetent *Escherichia coli* cells were prepared following the protocol of Sambrook *et al.* (33). T5 exonuclease, Phusion polymerase, and *Taq* ligase were purchased from New England Biolabs (NEB, Ipswich, MA). M9-N minimal medium (abbreviated as M9-N buffer; pH 7.4) was used as a buffering system for whole cells, lysates, and purified proteins, unless otherwise specified. M9-N buffer was used without a carbon source; it contains 47.7 mM  $\text{Na}_2\text{HPO}_4$ , 22.0 mM  $\text{KH}_2\text{PO}_4$ , 8.6 mM  $\text{NaCl}$ , 2.0 mM  $\text{MgSO}_4$ , and 0.1 mM  $\text{CaCl}_2$ .

## II. General Procedures

**(A) Plasmid construction.** All variants described in this paper were cloned and expressed using the pET22(b)+ vector (Novagen). The gene encoding *Rma* cyt *c* (UNIPROT ID B3FQS5) was obtained as a single gBlock (IDT), codon-optimized for *E. coli*, and cloned using Gibson assembly (31) into pET22(b)+ (Novagen) between restriction sites *Nde*I and *Xho*I in frame with an *N*-terminal pelB leader sequence (to ensure periplasmic localization and proper maturation; MKYLLPTAAAGLLLLAAQPA MA) and a *C*-terminal 6xHis-tag. This plasmid was co-transformed with the cytochrome *c* maturation plasmid pEC86 (32) into *E. coli*<sup>®</sup> EXPRESS BL21(DE3) cells (Lucigen).

**(B) Cytochrome *c* expression and purification.** Purified cytochrome *c* proteins were prepared as follows. One liter HB<sub>amp/chor</sub> in a 4 L flask was inoculated with an overnight culture (20 mL, LB<sub>amp/chor</sub>) of recombinant *E. coli*<sup>®</sup> EXPRESS BL21(DE3) cells containing a pET22(b)+ plasmid encoding the cytochrome *c* variant, and the pEC86 plasmid. The culture was shaken at 37 °C and 200 rpm (no humidity control) until the OD<sub>600</sub> was 0.7 (approximately 3 hours). The culture was placed on ice for 30 minutes, and isopropyl β-D-1-thiogalactopyranoside (IPTG) and 5-aminolevulinic acid (ALA) were added to final concentrations of 20 μM and 200 μM respectively.

The incubator temperature was reduced to 20 °C, and the culture was allowed to shake for 20 hours at 200 rpm. Cells were harvested by centrifugation (4 °C, 15 min, 4,000xg), and the cell pellet was stored at –20 °C until further use (at least 24 hours). The cell pellet was resuspended in buffer containing 100 mM NaCl, 20 mM imidazole, and 20 mM Tris-HCl buffer (pH 7.5 at 25 °C) and cells were lysed by sonication (2 minutes, 2 seconds on, 2 seconds off, 40% duty cycle; Qsonica Q500 sonicator). Cell lysate was placed in a 75 °C heat bath for 10 minutes, and cell debris was removed by centrifugation for 20 min (5000xg, 4 °C). Supernatant was sterile filtered through a 0.45 μm cellulose acetate filter and purified using a 1 mL Ni-NTA column (HisTrap HP, GE Healthcare, Piscataway, NJ) using an AKTA purifier FPLC system (GE healthcare). The cytochrome *c* protein was eluted from the column by running a gradient from 20 to 500 mM imidazole over 10 column volumes.

The purity of the collected cytochrome *c* fractions was analyzed using sodium dodecyl sulfate-polyacrylamide gel electrophoresis (SDS-PAGE). Pure fractions were pooled and concentrated using a 3 kDa molecular weight cut-off centrifugal filter and dialyzed overnight into 0.05 M phosphate buffer (pH = 7.5) using 3 kDa molecular weight cut-off dialysis tubing. The dialyzed protein was concentrated again, flash-frozen on dry ice, and stored at –20 °C.

The concentration of cytochrome *c* was determined in triplicate using the ferrous assay described in section (E).

**(C) P450 and globin expression and purification.** Purified P450s and globins were prepared differently from the cytochrome *c* proteins, and described as follows. One liter HB<sub>amp</sub> in a 4 L flask was inoculated with an overnight culture (20 mL, LB<sub>amp</sub>) of recombinant *E. coli*<sup>®</sup> EXPRESS BL21(DE3) cells containing a pET22(b)+ plasmid encoding the P450 or globin variant. The culture was shaken at 37 °C and 200 rpm (no humidity control) until the OD<sub>600</sub> was 0.7 (approximately 3 hours). The culture was

placed on ice for 30 minutes, and IPTG and 5-ALA were added to final concentrations of 0.5 mM and 1 mM, respectively. The incubator temperature was reduced to 20 °C, and the culture was allowed to shake for 20 hours at 200 rpm. Cells were harvested by centrifugation (4 °C, 15 min, 4,000xg), and the cell pellet was stored at -20 °C until further use (at least 24 hours). The cell pellet was resuspended in buffer containing 100 mM NaCl, 20 mM imidazole, and 20 mM Tris-HCl buffer (pH 7.5 at 25 °C). Hemin (30 mg/mL, 0.1 M NaOH; Frontier Scientific) was added to the resuspended cells such that 1 mg of hemin was added for every 1 gram of cell pellet. Cells were lysed by sonication (2 minutes, 1 seconds on, 2 seconds off, 40% duty cycle; Qsonica Q500 sonicator). Cell debris was removed by centrifugation for 20 min (27,000xg, 4 °C). Supernatant was sterile filtered through a 0.45 µm cellulose acetate filter, and purified using a 1 mL Ni-NTA column (HisTrap HP, GE Healthcare, Piscataway, NJ) using an AKTA purifier FPLC system (GE healthcare). The P450 and globin proteins were eluted from the column by running a gradient from 20 to 500 mM imidazole over 10 column volumes.

The purity of the collected protein fractions was analyzed using SDS-PAGE. Pure fractions were pooled and concentrated using a 10 kDa molecular weight cut-off centrifugal filter and buffer-exchanged with 0.1 M phosphate buffer (pH = 8.0). The purified protein was flash-frozen on dry ice and stored at -20 °C.

P450 and globin concentrations were determined in triplicate using the hemochrome assay described in section (D).

**(D) Hemochrome assay.** A solution of sodium dithionite (10 mg/mL) was prepared in M9-N buffer. Separately, a solution of 1 M NaOH (0.4 mL) was mixed with pyridine (1 mL), followed by centrifugation (10,000xg, 30 seconds) to separate the excess aqueous layer gave a pyridine-NaOH solution. To a cuvette containing 700 µL protein solution (purified protein or heat-treated lysate) in M9-N buffer, 50 µL of dithionite solution and 250 µL pyridine-NaOH solution were added. The cuvette was sealed with Parafilm, and the UV-Vis spectrum was recorded immediately. Cytochrome *c* concentration was determined using  $\epsilon_{550-535} = 22.1 \text{ mM}^{-1}\text{cm}^{-1}$  (34). Protein concentrations determined by the hemochrome assay were in agreement with that determined by the bicinchoninic acid (BCA) assay (Thermo Fisher) using bovine serum albumin (BSA) for standard curve preparation.

**(E) Ferrous assay.** To a cuvette containing 700 µL protein solution in M9-N buffer was added 50 µL of dithionite solution (10 mg/mL in M9-N buffer). The cuvette was sealed with Parafilm, and the UV-Vis spectrum was recorded immediately. The absorbance value for the peak at 550 nm was recorded, and background absorbance at 600 nm was subtracted. Using the protein concentration as determined by the hemochrome assay, ferrous  $\epsilon_{550-600}$  was determined to be 27  $\text{mM}^{-1}\text{cm}^{-1}$  for wild-type *Rma* cyt *c*, and 21  $\text{mM}^{-1}\text{cm}^{-1}$  for *Rma* V75T M100D M103E (see calibration curves shown on the following page). Concentrations of *Rma* M100D and V75T M100D were determined using the extinction coefficient calculated for V75T M100D M103E.

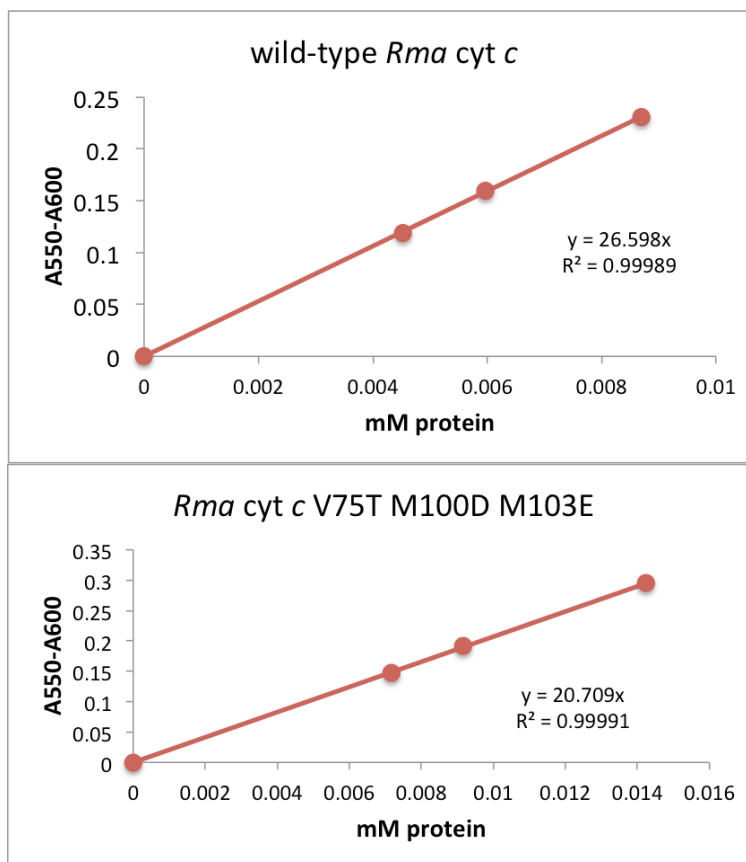

**(F) Library construction.** Cytochrome *c* site-saturation mutagenesis libraries were generated using a modified version of the 22-codon site-saturation method (35). For each site-saturation library, oligonucleotides were ordered such that the coding strand contained the degenerate codon NDT, VHG or TGG. The reverse complements of these primers were also ordered. The three forward primers were mixed together in a 12:9:1 ratio, (NDT:VHG:TGG) and the three reverse primers were mixed similarly. Two PCRs were performed, pairing the mixture of forward primers with a pET22(b)+ internal reverse primer, and the mixture of reverse primers with a pET22b internal forward primer. The two PCR products were gel purified, ligated together using Gibson assembly (31), and transformed into *E. coli*<sup>®</sup> EXPRESS BL21(DE3) cells. Primer sequences are available upon request.

**(G) Enzyme library screening.** Single colonies were picked with toothpicks off of LB<sub>amp/chor</sub> agar plates, and grown in deep-well (2 mL) 96-well plates containing LB<sub>amp/chor</sub> (400  $\mu$ L) at 37 °C, 250 rpm shaking, and 80% relative humidity overnight. After 16 hours, 30  $\mu$ L aliquots of these overnight cultures were transferred to deep-well 96-well plates containing HB<sub>amp/chor</sub> (1 mL) using a 12-channel EDP3-Plus 5-50  $\mu$ L pipette (Rainin). Glycerol stocks of the libraries were prepared by mixing cells in LB<sub>amp/chor</sub> (100  $\mu$ L) with 50% v/v glycerol (100  $\mu$ L). Glycerol stocks were stored at -78 °C in 96-well microplates. Growth plates were allowed to shake for 3 hours at 37 °C, 250 rpm shaking, and 80% relative humidity. The plates were then placed on ice for 30 min. Cultures were

induced by adding 10  $\mu\text{L}$  of a solution, prepared in sterile deionized water, containing 2 mM isopropyl  $\beta$ -D-1-thiogalactopyranoside (IPTG) and 20 mM ALA. The incubator temperature was reduced to 20  $^{\circ}\text{C}$ , and the induced cultures were allowed to shake for 20 hours (250 rpm, no humidity control). Cells were pelleted (4,000xg, 5 min, 4  $^{\circ}\text{C}$ ) and resuspended in 500  $\mu\text{L}$  M9-N buffer. For cell lysis, plates were placed in a 75  $^{\circ}\text{C}$  water bath for 10 min, followed by centrifugation (4,000xg, 5 min, 4  $^{\circ}\text{C}$ ) to remove cell debris. The resulting heat-treated lysates (340  $\mu\text{L}$ ) were then transferred to deep-well plates for biocatalytic reactions. In an anaerobic chamber, to deep-well plates of heat-treated lysates were added  $\text{Na}_2\text{S}_2\text{O}_4$  (40  $\mu\text{L}$  per well, 100 mM in  $\text{dH}_2\text{O}$ ),  $\text{PhMe}_2\text{SiH}$  (10  $\mu\text{L}$  per well, 400 mM in MeCN) and Me-EDA (10  $\mu\text{L}$  per well, 400 mM in MeCN). The plates were sealed with aluminum sealing tape, removed from the anaerobic chamber, and shaken at 400 rpm for 1.5 h. After quenching with cyclohexane (1 mL), internal standard was added (20  $\mu\text{L}$  of 20 mM methyl 2-phenylacetate in cyclohexane) and the reaction mixtures were pipetted up and down to thoroughly mix the organic and aqueous layers. The plates were centrifuged (4,000xg, 5 min) and the organic layer (400  $\mu\text{L}$ ) was transferred to shallow-well 96-well plates for SFC analysis. Hits from library screening were confirmed by small-scale biocatalytic reactions, which were analyzed by GC and SFC for accurate determination of turnovers and enantioselectivities.

**(H) Protein lysate preparation.** Protein lysates for biocatalytic reactions were prepared as follow: *E. coli* cells expressing *Rma* cyt *c* variant were pelleted (4,000xg, 5 min, 4  $^{\circ}\text{C}$ ), resuspended in M9-N buffer and adjusted to the appropriate  $\text{OD}_{600}$ . The whole-cell solution was heat-treated (75  $^{\circ}\text{C}$  for 10 min) then centrifuged (14,000xg, 10 min, 4  $^{\circ}\text{C}$ ) to remove cell debris. The supernatant was sterile filtered through a 0.45  $\mu\text{m}$  cellulose acetate filter into a 6 mL crimp vial, crimp sealed, and the head space of the crimp vial was degassed by bubbling argon through for at least 10 min. The concentration of cytochrome *c* protein lysate was determined using the ferrous assay described in section (E). Using this protocol, the protein concentrations we typically observed for  $\text{OD}_{600} = 15$  lysates are in the 8-15  $\mu\text{M}$  range for wild-type *Rma* cyt *c* and 2-10  $\mu\text{M}$  for other *Rma* cyt *c* variants.

**(I) Small-scale biocatalytic reaction.** In an anaerobic chamber, protein lysate (340  $\mu\text{L}$ ) in a 2 mL crimp vial was added 40  $\mu\text{L}$   $\text{Na}_2\text{S}_2\text{O}_4$  (100 mM in  $\text{dH}_2\text{O}$ ), 10  $\mu\text{L}$   $\text{PhMe}_2\text{SiH}$  (400 or 800 mM in MeCN) and 10  $\mu\text{L}$  Me-EDA (400 mM in MeCN). The vial was crimp sealed, removed from the anaerobic chamber, and shaken at 400 rpm at room temperature for the stated reaction time. At the end of the reaction, the crimp vial was opened and the reaction was quenched with cyclohexane (1 mL). Internal standard was added (20  $\mu\text{L}$  of 20 mM 2-phenylethanol in cyclohexane) and the reaction mixture was transferred to a microcentrifuge tube, vortexed (10 seconds, 3 times), then centrifuged (14,000xg, 5 min) to completely separate the organic and aqueous layers (the vortex-centrifugation step was repeated if complete phase separation was not achieved). The organic layer (750  $\mu\text{L}$ ) was removed for GC and SFC analysis. All biocatalytic reactions were performed in triplicate unless otherwise stated. The total turnover numbers (TTNs) reported are calculated with respect to the protein catalyst and represent the total number of turnovers that is possible to obtain from the catalyst under the stated reaction conditions.

### III. Supporting Tables and Figures

**Table S1.** Summary of known catalytic systems for enantioselective carbene insertion into silicon–hydrogen bonds

| Chiral catalytic system        | Ref  | Reaction condition                                                               | Substrate scope | TTN      | % ee     |
|--------------------------------|------|----------------------------------------------------------------------------------|-----------------|----------|----------|
| <b>Copper</b>                  |      |                                                                                  |                 |          |          |
| <b>A</b>                       | (15) | CH <sub>2</sub> Cl <sub>2</sub> , rt, 18 h                                       | 4               | 17 to 25 | 17 to 98 |
| <b>B</b>                       | (36) | C <sub>6</sub> H <sub>6</sub> , 0 °C, 13.5 h                                     | 1               | 8 to 10  | 29 to 78 |
| <b>C</b>                       | (14) | CH <sub>2</sub> Cl <sub>2</sub> , -60 to 0 °C, 2-12 h                            | 24              | 3 to 19  | 12 to 99 |
| <b>B</b>                       | (37) | CH <sub>2</sub> Cl <sub>2</sub> , -40 to 0 °C, 48-72 h                           | 8               | 5 to 9   | 49 to 88 |
| <b>B</b>                       | (38) | CH <sub>2</sub> Cl <sub>2</sub> , -40 to -10 °C                                  | 9               | 5 to 8   | 40 to 84 |
| <b>Iridium</b>                 |      |                                                                                  |                 |          |          |
| <b>D</b>                       | (13) | CH <sub>2</sub> Cl <sub>2</sub> , -78 or -30 °C, 24 h                            | 15              | 24 to 50 | 94 to 99 |
| <b>E</b>                       | (39) | CH <sub>2</sub> Cl <sub>2</sub> , -78 °C, 24 h                                   | 7               | 75 to 94 | 72 to 91 |
| <b>Rhodium</b>                 |      |                                                                                  |                 |          |          |
| <b>F</b>                       | (12) | CH <sub>2</sub> Cl <sub>2</sub> , rt to 40 °C, 6-12 h                            | 34              | 9 to 30  | 77 to 99 |
| <b>G</b>                       | (40) | CH <sub>2</sub> Cl <sub>2</sub> , -78 °C or rt, 3-12 h                           | 5               | 8 to 45  | 20 to 63 |
| <b>H</b>                       | (36) | C <sub>5</sub> H <sub>12</sub> , -78 to -75 °C, 24 h                             | 1               | 24 to 70 | 48 to 97 |
| <b>I</b>                       | (11) | CF <sub>3</sub> CH <sub>2</sub> OH, -35 °C                                       | 10              | 51 to 97 | 20 to 99 |
| <b>H</b>                       | (41) | CH <sub>2</sub> Cl <sub>2</sub> , -78 °C then rt, 23 h                           | 6               | 22 to 54 | 77 to 94 |
| various Rh(II)-<br>carboxylate | (42) | CH <sub>2</sub> Cl <sub>2</sub> , rt or -78 °C, 0.5 to<br>(43) 24 h to overnight | 6               | <1 to 23 | 6 to 76  |
| <b>J</b>                       | (44) | CH <sub>2</sub> Cl <sub>2</sub> , -78 °C to rt, 23 h                             | 2               | 35 to 40 | 38 to 58 |
| <b>H</b>                       | (45) | CH <sub>2</sub> Cl <sub>2</sub> , -78 °C, 1 to 1.5 h                             | 4               | 34 to 43 | 35 to 72 |
| <b>H</b>                       | (46) | C <sub>5</sub> H <sub>12</sub> , -78 °C, 24 h                                    | 5               | 13 to 19 | 75 to 95 |
| various Rh(II)-<br>carboxylate | (47) | CH <sub>2</sub> Cl <sub>2</sub> , rt or reflux                                   | 1               | 8 to 17  | 6 to 47  |

Catalytic systems that could yield enantiopure products are highlighted in blue. rt = room temperature. In cases where the reaction times were not documented in the original literature, this information is not shown in the table above.

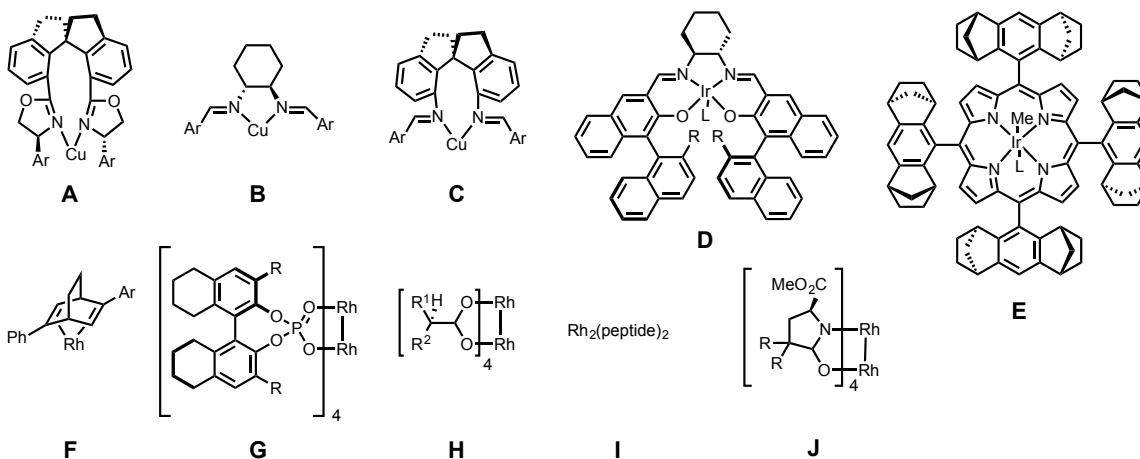

**Table S2.** Summary of known catalytic systems that accept  $\alpha$ -alkyl diazo compounds as substrates for enantioselective carbene insertion into silicon–hydrogen bonds

$\alpha$ -Alkyl diazo compounds are challenging substrates for intermolecular carbene-transfer chemistry due to their propensity to undergo competing intramolecular  $\beta$ -hydride migration (48, 13). As a result, only a subset of catalytic systems shown in Table S1 have been reported to accommodate these substrates, as summarized in the table below:

| Chiral catalytic system | Ref  | Reaction condition                                     | Substrate scope | TTN               | % ee     |
|-------------------------|------|--------------------------------------------------------|-----------------|-------------------|----------|
| Copper                  |      |                                                        |                 |                   |          |
| A                       | (15) | CH <sub>2</sub> Cl <sub>2</sub> , rt, 18 h             | 4               | 17 to 25          | 17 to 98 |
| C                       | (14) | CH <sub>2</sub> Cl <sub>2</sub> , -40 °C, 2-12 h       | 2               | 3 to 12           | 12 to 35 |
| Iridium                 |      |                                                        |                 |                   |          |
| D                       | (13) | CH <sub>2</sub> Cl <sub>2</sub> , -78 °C, 24 h         | 8               | 24 to 44          | 94 to 99 |
| Rhodium                 |      |                                                        |                 |                   |          |
| F                       | (12) | CH <sub>2</sub> Cl <sub>2</sub> , rt to 40 °C, 6-12 h  | 2               | 11 to 15          | 70 to 77 |
| I                       | (11) | CF <sub>3</sub> CH <sub>2</sub> OH, -35 °C             | 1               | n.d. <sup>§</sup> | 64       |
| H                       | (41) | CH <sub>2</sub> Cl <sub>2</sub> , -78 °C then rt, 23 h | 5               | 22 to 54          | 77 to 94 |

See Table S1 for chemical structures of chiral catalysts. rt = room temperature. <sup>§</sup> The amount of product formed was not reported in the original literature.

**Table S3.** Summary of known catalytic systems for reaction between phenyldimethylsilane and Me-EDA *via* enantioselective carbene insertion into silicon–hydrogen bond

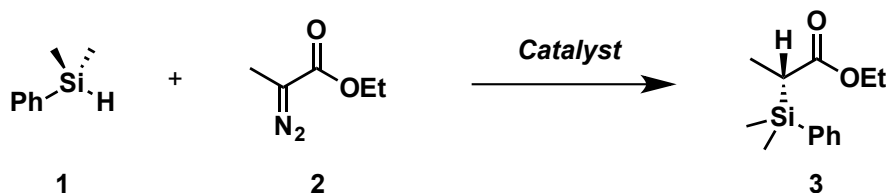

| Chiral catalytic system | Ref  | Reaction condition                                    | TTN | % ee |
|-------------------------|------|-------------------------------------------------------|-----|------|
| Copper                  |      |                                                       |     |      |
| C                       | (14) | CH <sub>2</sub> Cl <sub>2</sub> , -40 °C, 2-12 h      | 12  | 35   |
| Iridium                 |      |                                                       |     |      |
| D                       | (13) | CH <sub>2</sub> Cl <sub>2</sub> , -78 °C, 24 h        | 43  | 97   |
| Rhodium                 |      |                                                       |     |      |
| F                       | (12) | CH <sub>2</sub> Cl <sub>2</sub> , rt to 40 °C, 6-12 h | 15  | 77   |

See Table S1 for chemical structures of chiral catalysts. rt = room temperature.



**Table S4.** Preliminary experiments with heme and purified heme proteins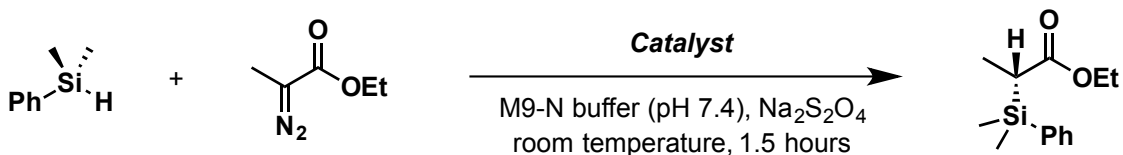

| Catalyst                            | TTN            | % ee      |
|-------------------------------------|----------------|-----------|
| <b>Controls</b>                     |                |           |
| None                                | 0              | -         |
| Hemin                               | 4 ± 1          | 0         |
| Hemin + BSA                         | 1 ± 1          | 0         |
| <b>P450s</b>                        |                |           |
| BM3 P450 T268A (22)                 | 44 ± 15        | 0         |
| BM3 P450 T268A C400H (49)           | 45 ± 3         | <5        |
| BM3 P450 CIS I263F C400S T438S (50) | 24 ± 9         | <5        |
| BM3 P450 F87A T268A C400S (51)      | 40 ± 15        | <5        |
| BM3 P450 Hstar H92N H100N (52)      | 46 ± 7         | 0         |
| <b>Myoglobins</b>                   |                |           |
| Sperm whale Mb                      | 12 ± 1         | 0         |
| Sperm whale Mb H64V V68A (53)       | 17 ± 1         | 0         |
| <b>Cytochromes c</b>                |                |           |
| Horse heart cyt c                   | 31 ± 10        | <5        |
| Bovine heart cyt c                  | 54 ± 2         | 6         |
| <i>S. cerevisiae</i> cyt c          | 11 ± 1         | <5        |
| <b><i>R. marinus</i> cyt c</b>      | <b>34 ± 10</b> | <b>97</b> |
| <i>H. thermophilus</i> cyt c        | 8 ± 2          | 16        |
| <i>R. globiformis</i> cyt c         | 4 ± 1          | <5        |
| <b>Others</b>                       |                |           |
| Horse radish peroxidase             | 0              | -         |
| <i>C. glutamicum</i> catalase       | 0              | -         |

Heme proteins that are available commercially or in our laboratory inventory were screened to identify the most enantioselective protein variant as starting point for directed evolution. Experiments with heme proteins were performed using 10  $\mu\text{M}$  purified heme protein, 10 mM silane, 10 mM diazo ester, 10 mM  $\text{Na}_2\text{S}_2\text{O}_4$ , 5 vol% MeCN, M9-N buffer at room temperature under anaerobic conditions for 1.5 h. Experiments with hemin were performed using 100  $\mu\text{M}$  hemin. Experiments with hemin and BSA were performed using 100  $\mu\text{M}$  hemin in the presence of BSA (0.75 mg/mL). Reactions were performed in triplicate. TTNs reported are the average of three experiments. Within instrument detection limit, variability in % ee was not observed. Unreacted starting materials were observed at the end of all reactions and no attempt was made to optimize these reactions.

**Table S5.** Carbon–silicon bond formation catalyzed by *Rma cyt c* variants

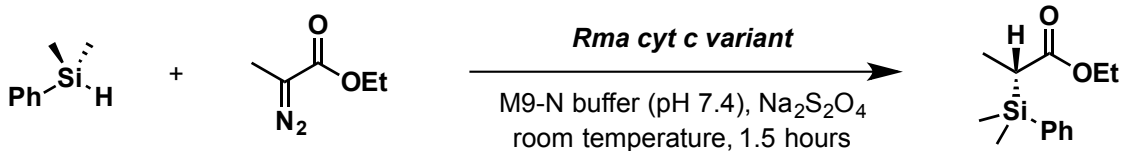

| <i>Rma cyt c</i>        | TTN              |
|-------------------------|------------------|
| <b>WT</b>               | <b>44 ± 27</b>   |
| <b>M100D</b>            | <b>549 ± 24</b>  |
| V75T                    | 150 ± 48         |
| M103E                   | 70 ± 21          |
| <b>V75T M100D</b>       | <b>892 ± 20</b>  |
| V75T M100E              | 154 ± 37         |
| M100D M103E             | 520 ± 88         |
| <b>V75T M100D M103E</b> | <b>1518 ± 51</b> |

Experiments were performed using lysates of *E. coli* expressing *Rma cyt c* variant (OD<sub>600</sub> = 15; heat-treated at 75 °C for 10 min), 10 mM silane, 10 mM diazo ester, 10 mM Na<sub>2</sub>S<sub>2</sub>O<sub>4</sub>, 5 vol% MeCN, M9-N buffer at room temperature under anaerobic conditions for 1.5 h. Reactions were performed in triplicate. TTNs reported are the average of three experiments.

**Table S6.** Comparison of carbon–silicon bond forming rates of four generations of *Rma cyt c*

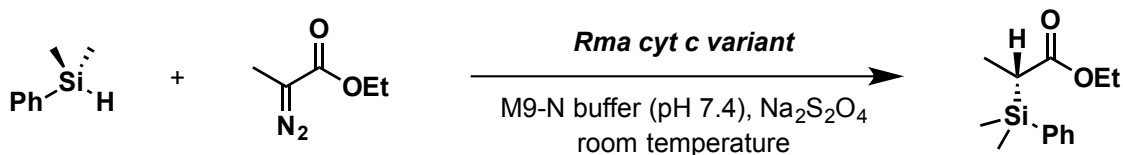

To determine the initial reaction rate, experiments were performed using purified *Rma cyt c* variant (0.8  $\mu\text{M}$ ), 10 mM silane, 10 mM diazo ester, 10 mM Na<sub>2</sub>S<sub>2</sub>O<sub>4</sub>, 5 vol% MeCN, M9-N buffer at room temperature under anaerobic conditions for various time intervals. See below for experimental procedure. The data used for determining the initial rate of each *Rma cyt c* variant is showed in the following graph:

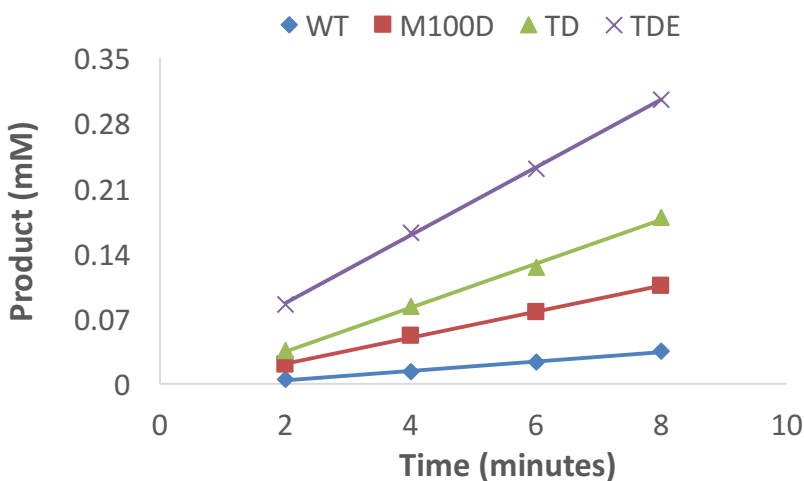

| <i>Rma cyt c</i> variant | initial rate / $\mu\text{M min}^{-1}$ | turnover frequency (TOF) / $\text{min}^{-1}$ | TOF relative to WT |
|--------------------------|---------------------------------------|----------------------------------------------|--------------------|
| WT                       | $5.1 \pm 0.3$                         | $6.4 \pm 0.3$                                | 1                  |
| M100D                    | $14.0 \pm 0.4$                        | $17.5 \pm 0.5$                               | $2.8 \pm 0.2$      |
| V75T M100D               | $23.6 \pm 0.8$                        | $29.5 \pm 1.0$                               | $4.6 \pm 0.3$      |
| V75T M100D M103E         | $36.4 \pm 0.5$                        | $45.5 \pm 0.7$                               | $7.1 \pm 0.4$      |

Errors quoted in the table above are calculated from the standard deviations of the fitting of data in the product vs time plot.

#### General procedure for carrying out timed experiments

In an anaerobic chamber, 1 mL Na<sub>2</sub>S<sub>2</sub>O<sub>4</sub> (100 mM in dH<sub>2</sub>O) was added to 4 mL purified *Rma cyt c* protein (2.0  $\mu\text{M}$  in M9-buffer) to give **Solution 1**. To four 2 mL microcentrifuge tubes were each added 180  $\mu\text{L}$  M9-N buffer, 10  $\mu\text{L}$  PhMe<sub>2</sub>SiH (400 mM in MeCN) and 10  $\mu\text{L}$  Me-EDA (400 mM in MeCN), and the mixtures were mixed

thoroughly on a shaker (480 rpm for 2 min). To these mixtures were added 200  $\mu\text{L}$  **Solution 1**, and the microcentrifuge tubes were closed and quickly shaken by hand for 3 seconds to ensure thorough mixing, before the tubes were returned to the shaker. The reactions were stopped at specific time points (2 min, 4 min, 6 min, and 8 min) by quick addition (within 10 seconds) of 40  $\mu\text{L}$  pyridine solution (400 mM in  $\text{dH}_2\text{O}$ ), 20  $\mu\text{L}$  internal standard (20 mM acetophenone in toluene) and 1 mL cyclohexane. (Note: pyridine was added as a quencher to significantly slow down the reaction.) After the mixtures were vortexed for 20 seconds, 200  $\mu\text{L}$  organic layer was immediately removed for GC analysis.

**Table S7.** Rh(II) or Cu(II)-catalyzed reactions between Me-EDA and 4-(dimethylsilyl)phenol (**1k**) or 4-(dimethylsilyl)aniline (**23**)

Rh<sub>2</sub>(OAc)<sub>4</sub> and Cu(OTf)<sub>2</sub>, which are known to catalyze carbene insertion into Si–H bonds under ligand-free conditions (54), were tested for their chemoselectivities towards Si–H, O–H and N–H insertions:

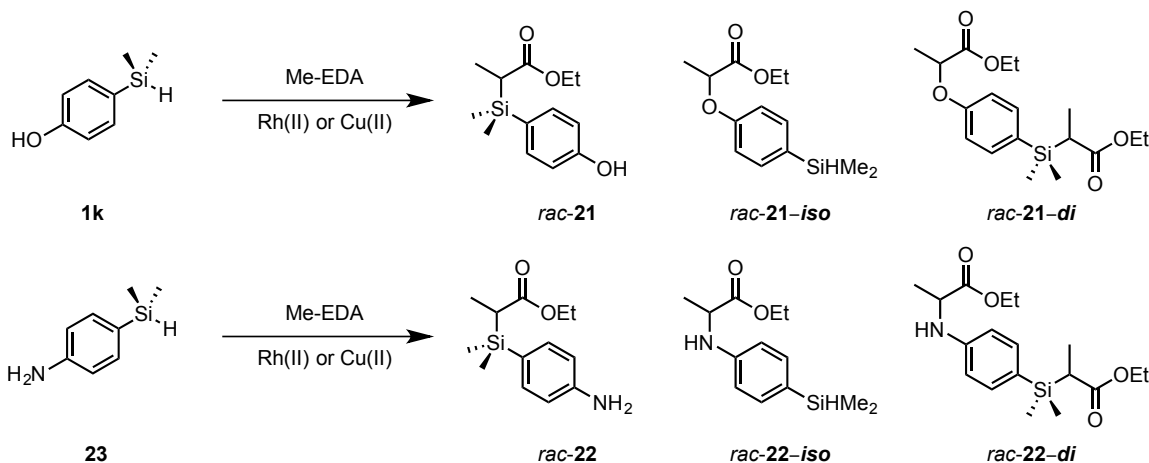

|                                    | <b>21</b> (Si–H insertion) | <b>21-iso</b> (O–H insertion) | <b>21-di</b> (double insertion) |
|------------------------------------|----------------------------|-------------------------------|---------------------------------|
| Rh <sub>2</sub> (OAc) <sub>4</sub> | ×                          | ✓                             | ✓                               |
| Cu(OTf) <sub>2</sub>               | ×                          | ×                             | ×                               |
|                                    | <b>22</b> (Si–H insertion) | <b>22-iso</b> (N–H insertion) | <b>22-di</b> (double insertion) |
| Rh <sub>2</sub> (OAc) <sub>4</sub> | ×                          | ✓                             | ×                               |
| Cu(OTf) <sub>2</sub>               | ×                          | ×                             | ×                               |

Note: × = not detected; ✓ = detected. Cu(OTf)<sub>2</sub> gave complex mixtures of products in both reactions.

### Experimental procedure

To a 5 mL vial was added silane (0.1 mmol, 1.0 equiv.), metal catalyst (Rh<sub>2</sub>(OAc)<sub>4</sub> (0.44 mg, 1 mol%) or Cu(OTf)<sub>2</sub> (3.62 mg, 10 mol%)) and DCM (0.5 mL). The mixture was cooled to –78 °C before a solution of Me-EDA (25 μL, 2.0 equiv.) in DCM (0.3 mL) was added dropwise. After slowly warming up to room temperature in 4 hours, the reaction mixture was filtrated through a short pad of silica, diluted with DCM, and analyzed by GC-MS.

Products isolated from Rh<sub>2</sub>(OAc)<sub>4</sub>-catalyzed reactions with **1k** and **23** are shown on the next page. Both reactions generated multiple products, rendering product purification and quantitative analysis of these reactions difficult. Multiple rounds of purification by silica column chromatography were required to obtain samples suitable for characterization; yields were therefore not determined for these reactions. Notably, Si–H insertion products **21** and **22** were not observed in these reactions.

(Table S7 continued)

Rh<sub>2</sub>(OAc)<sub>4</sub>-catalyzed reaction with **1k** gave *rac*-**21-di** and *rac*-**21-iso**:

*rac*-**21-di**

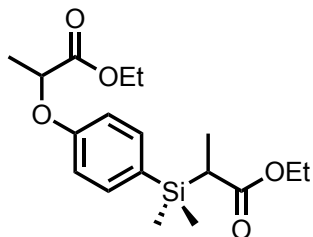

<sup>1</sup>H NMR (400 MHz, CDCl<sub>3</sub>) δ 7.40 (d, *J* = 8.6 Hz, 2H), 6.87 (d, *J* = 8.7 Hz, 2H), 4.75 (q, *J* = 6.8 Hz, 1H), 4.22 (q, *J* = 7.1 Hz, 2H), 4.01 (q, *J* = 7.1 Hz, 2H), 2.21 (q, *J* = 7.1 Hz, 1H), 1.62 (d, *J* = 6.8 Hz, 3H), 1.25 (t, *J* = 7.1 Hz, 3H), 1.17-1.10 (m, 6H), 0.33 (s, 6H). <sup>13</sup>C NMR (100 MHz, CDCl<sub>3</sub>) δ 176.19, 172.25, 158.86, 135.54, 128.29, 128.28, 114.65, 72.42, 61.46, 59.93, 30.30, 18.68, 14.47, 14.28, 11.43, -3.77, -4.60. HRMS (FAB) *m/z*: 352.1714 (M<sup>+</sup>); calc. for C<sub>18</sub>H<sub>28</sub>SiO<sub>5</sub>: 352.1706.

*rac*-**21-iso** (this compound was inseparable from impurities)

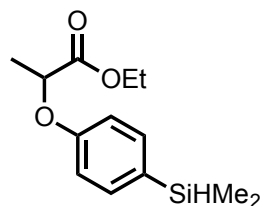

<sup>1</sup>H NMR (400 MHz, CDCl<sub>3</sub>) δ 7.44 (d, *J* = 8.7 Hz, 2H), 6.87 (d, *J* = 8.7 Hz, 2H), 4.76 (q, *J* = 6.8 Hz, 1H), 4.39 (hept, *J* = 3.7 Hz, 1H), 4.22 (q, *J* = 6.9 Hz, 2H), 1.62 (d, *J* = 6.8 Hz, 3H), 1.26 (t, *J* = 7.1 Hz, 3H), 0.31 (d, *J* = 3.8 Hz, 6H).

Rh<sub>2</sub>(OAc)<sub>4</sub>-catalyzed reaction with **23** gave *rac*-**22-iso** and the corresponding double N-H insertion product:

*rac*-**22-iso**

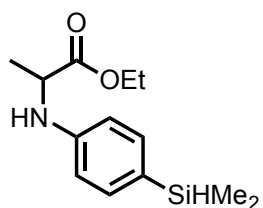

<sup>1</sup>H NMR (400 MHz, CDCl<sub>3</sub>) δ 7.24-7.17 (m, 2H), 6.88-6.68 (m, 3H), 4.68 (dq, *J* = 5.5, 2.8 Hz, 1H), 4.22-4.11 (m, 3H), 1.50 (br d, *J* = 6.4 Hz, 3H), 1.25 (t, *J* = 7.1 Hz, 3H), 0.19 (d, *J* = 2.8 Hz, 6H). <sup>13</sup>C NMR (100 MHz, CDCl<sub>3</sub>) δ 173.94, 135.20, 129.50, 119.78, 114.93, 61.47, 53.20, 18.62, 14.31, 0.71. HRMS (FAB) *m/z*: 250.1253 ((M+H)-H<sub>2</sub><sup>+</sup>); calc. for C<sub>13</sub>H<sub>20</sub>SiNO<sub>2</sub>: 250.1263.

Interestingly, the following compound was also isolated as a mixture of diastereomers. The counter anion of the ammonium salt was not determined.

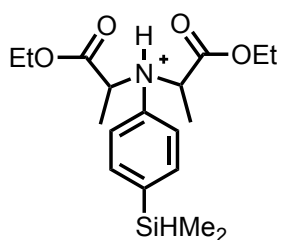

<sup>1</sup>H NMR (400 MHz, CDCl<sub>3</sub>) δ 7.22 (overlapping doublets, *J* = 8.8, 7.3 Hz, 2H), 6.84 (t, *J* = 7.3 Hz, 1H), 6.78 (br d, *J* = 7.9 Hz, 2H), 4.99-4.55 (m, 1H), 4.44 (q, *J* = 7.1 Hz, 2H), 4.23 (app qd, *J* = 7.2, 2.0 Hz, 4H), 1.55 (d, *J* = 7.2 Hz, 6H), 1.29 (t, *J* = 7.1 Hz, 6H), 0.30-0.19 (m, 6H). <sup>13</sup>C NMR (100 MHz, CDCl<sub>3</sub>) δ 174.40, 146.38, 128.89, 119.30, 117.17, 61.24, 56.24, 15.95, 14.34, 0.71. HRMS (FAB) *m/z*: 352.1958 (M<sup>+</sup>); calc. for C<sub>18</sub>H<sub>30</sub>SiNO<sub>4</sub>: 352.1944.

**Fig. S1 Representative SDS-PAGE gel of purified wild-type *Rma cyt c* and its V75T M100D M103E variant (TDE) in comparison to a standard protein ladder. The second and third lanes from the left are the same samples loaded at lower protein concentration.**

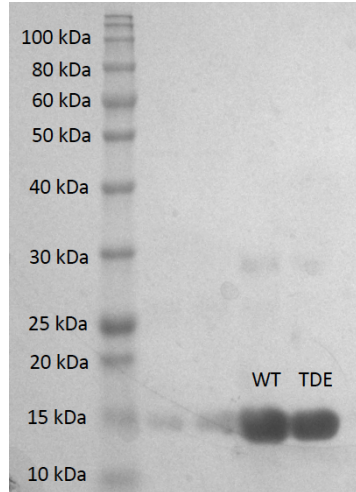

**Fig. S2 Circular dichroism (CD) spectra of purified *Rma cyt c* V75T M100D M103E (Rma TDE).**

*Rma cyt c* V75T M100D M103E was purified without performing the heat treatment step. Two identical samples were prepared in M9-N buffer, and one was heat treated at 75 °C for 10 minutes. After cooling to room temperature, the samples were analyzed by CD. The CD spectra of heat-treated and untreated *Rma cyt c* V75T M100D M103E are identical, suggesting that heat treatment at 75 °C for 10 minutes does not cause irreversible denaturation of the protein. The  $\Delta\epsilon_{MRW}$  values shown here are similar to previously published values for wild-type *Rma cyt c* (26), which suggests mutations V75T, M100D, and M103E are not highly disruptive to the protein secondary structure.

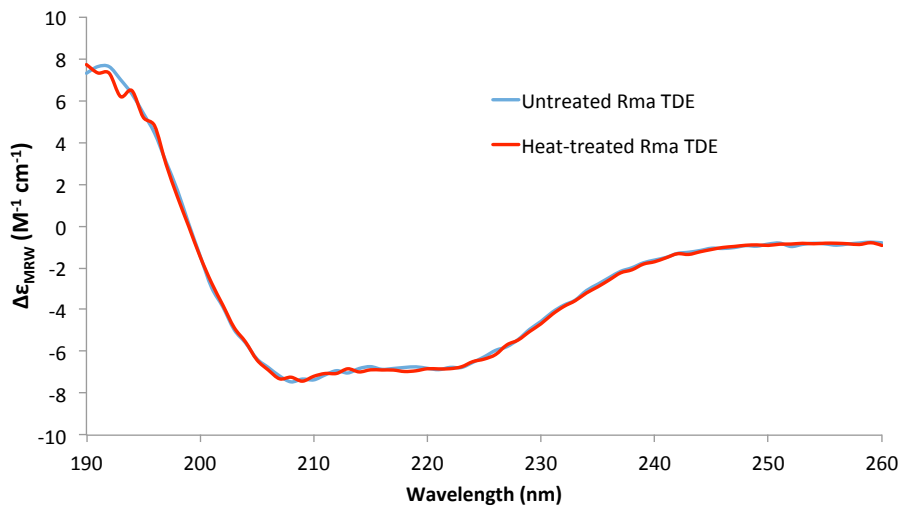

**Fig. S3 Working hypothesis of binding mode for the iron carbenoid in wild-type *Rma cyt c* and speculated reaction trajectory for carbon–silicon bond formation.**

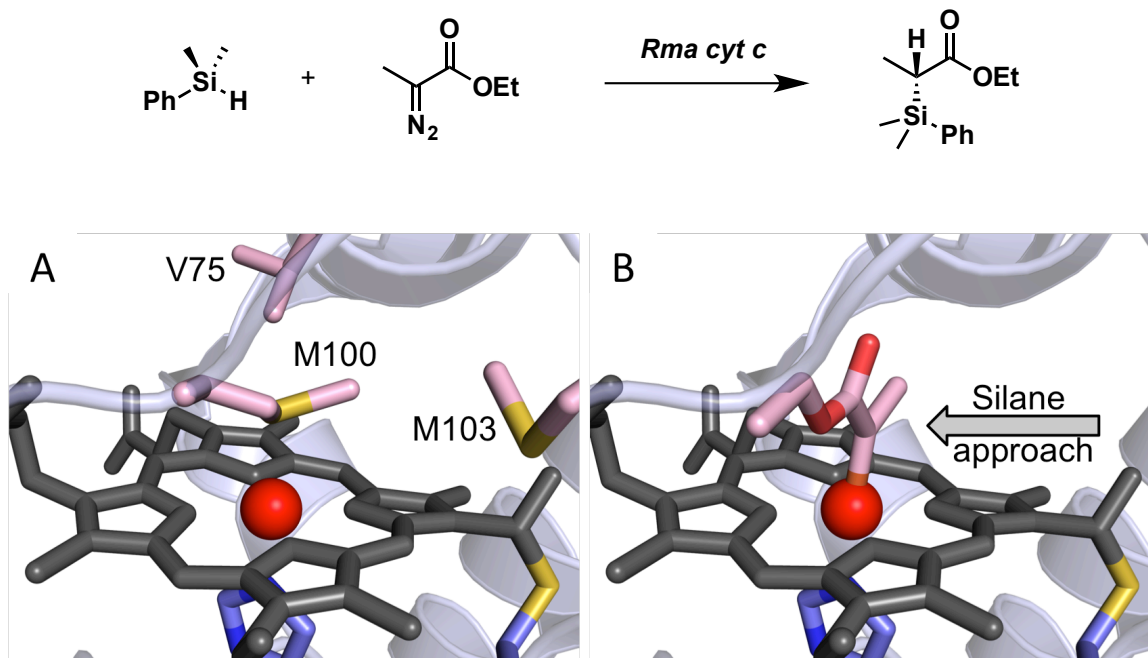

(A) Putative active site structure of wild-type *Rma cyt c* showing residues V75, M100, and M103 (PDB ID: 3CP5). (B) Proposed binding mode for the iron-carbenoid, where the carbenoid forms in a way that takes the place of the axial methionine. The silane is proposed to approach from the more solvent-exposed side in the wild-type protein, which explains the observed stereochemistry of the organosilicon product. The V75T, M100D, and M103E mutations may promote reactivity by improving solvent and substrate access to the iron center. It should be noted that the working hypothesis proposed here is highly speculative as structural data about the ability of bacterial cytochrome *c* proteins to bind organic molecules is practically non-existent.



**Fig. S4 Example of reaction time course of purified *Rma cyt c* M100D V75T M103E-catalyzed reaction between phenyldimethylsilane and Me-EDA.**

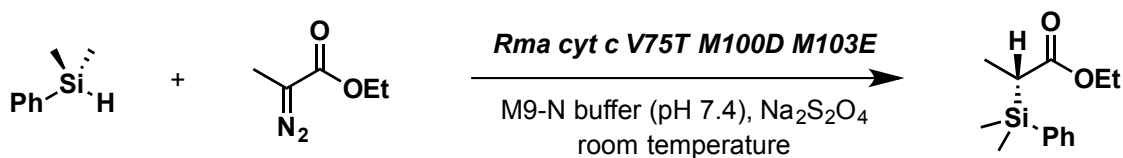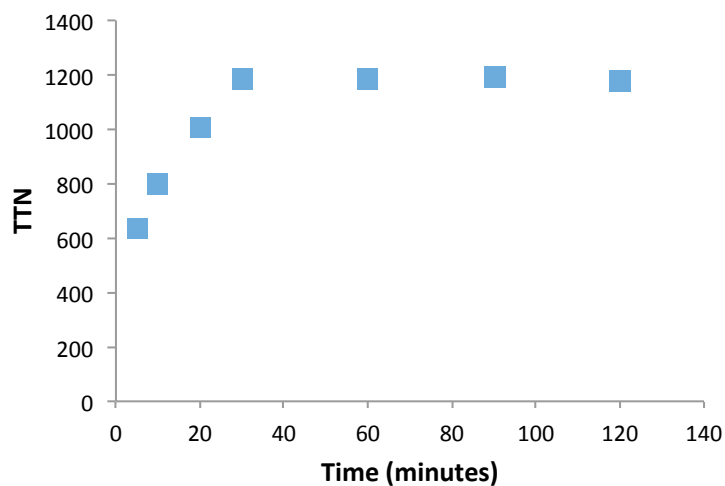

Experiments were performed using 3  $\mu$ M purified *Rma cyt c* V75T M100D M103E, 10 mM silane, 10 mM diazo ester, 10 mM Na<sub>2</sub>S<sub>2</sub>O<sub>4</sub>, 5 vol% MeCN, M9-N buffer at room temperature under anaerobic conditions. Reactions were performed in duplicate. TTNs shown are the average of two experiments.

It is possible that catalysis slows down and ultimately stops due to catalyst inactivation by carbene transfer to the protein, an inactivation mechanism we recently analyzed in detail in another carbene-transfer enzyme (52). The activity and lifetime of *Rma cyt c* would likely improve by identifying the protein residues affected by mechanism-based inhibitors and further mutagenesis studies. Furthermore, inactivation of whole-cell catalyst was previously found to be slower than purified enzyme (52); this might also be applicable to *Rma cyt c* in whole bacterial cell.

**Fig. S5 Additional substrates tested for *Rma cyt c* V75T M100D M103E-catalyzed carbon–silicon bond formation.**

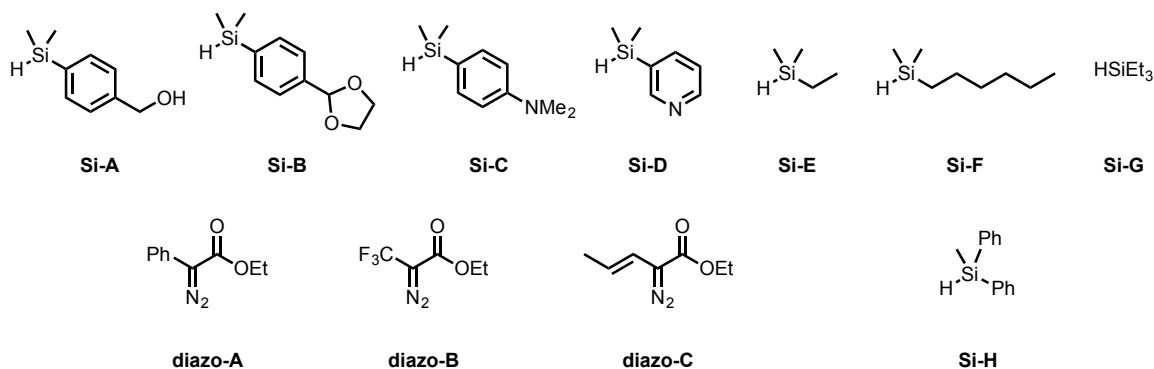

*Rma cyt c* V75T M100D M103E-catalyzed reactions of silanes **Si-A-H** were tested with Me-EDA and that of diazo compounds **diazo-A-C** were tested with phenyldimethylsilane under standard *in vitro* biocatalytic reaction conditions. Product formation was analyzed by GC-MS only, and comparison with chemically synthesized reference standards was not made. These preliminary results should be interpreted with caution and should not be used alone for drawing conclusions.

**Si-A-D** and **diazo-A**: formation of organosilicon product was detected by GC-MS.

**Si-E-H** and **diazo-B-C**: formation of organosilicon product was not detected by GC-MS.

Because biocatalysts that are fully genetically encoded can be readily optimized by directed evolution, the *Rma cyt c* V75T M100D M103E variant presented in this report is not the end point, but rather a parent to hundreds and thousands of future enzyme variants, some of which will most certainly surpass the scope and activity of the parent enzyme. For substrate scope expansion or other future applications, we suggest using the substrate of interest for directed evolution, and carrying out reaction screening under condition that suits individual substrate.

Fig. S6 Hammett analysis of *Rma cyt c* V75T M100D M103E-catalyzed carbon–silicon bond formation

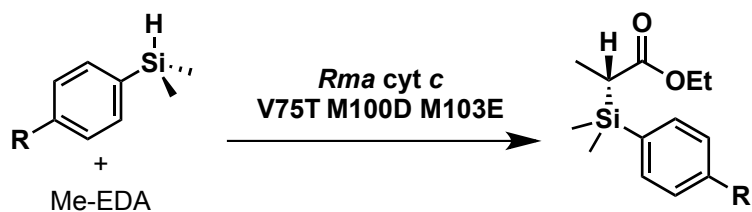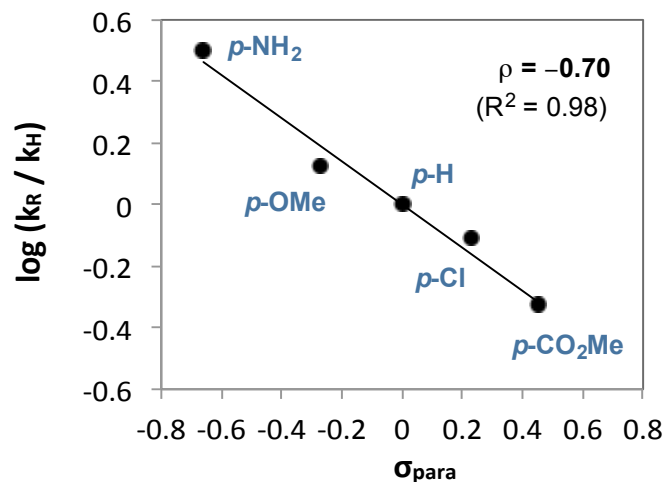

| R                  | $k_R / k_H$ | $\log(k_R / k_H)$ | $\sigma$ |
|--------------------|-------------|-------------------|----------|
| H                  | 1           | 0                 | 0        |
| MeO                | 1.3         | 0.13              | -0.27    |
| NH <sub>2</sub>    | 3.2         | 0.50              | -0.66    |
| Cl                 | 0.78        | -0.11             | 0.23     |
| CO <sub>2</sub> Me | 0.47        | -0.32             | 0.45     |

The Hammett plot suggests a small build-up of positive charge on the silane in the reaction transition state. This observation is similar to that reported for carbene insertion into Si–H bond catalyzed by copper ( $\rho = -0.54$ ) (37) and rhodium ( $\rho = -0.31$ ) (55).

#### IV. Substrate Synthesis and Characterization

Commercially available substrates were used as received: phenyldimethylsilane (Sigma-Aldrich), benzyldimethylsilane (Sigma-Aldrich), ethyl 2-diazopropanoate (Arch Bioscience). The following diazo compounds are known and prepared according to literature procedures: isopropyl 2-diazopropanoate (56), ethyl 2-diazobutanoate (57).

##### Dimethyl(*p*-tolyl)silane (1b)

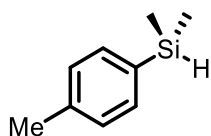

In a 100 mL round-bottom flask, chlorodimethylsilane (1.11 mL, 10.0 mmol) in THF (6 mL) was cooled to 0 °C. A solution of 4-methylphenylmagnesium bromide (24 mL, 0.5 M in THF) was added dropwise slowly over 15 min. Then reaction was allowed to warm to room temperature and stirred for 8 hours. The reaction mixture was quenched with NH<sub>4</sub>Cl (5 mL, sat. aq.) and the product was extracted with Et<sub>2</sub>O (15 mL × 3). The organic layer was washed with water (20 mL), brine (20 mL), dried over MgSO<sub>4</sub>, and then concentrated under reduced pressure (200 torr). The crude product was purified by silica column chromatography with pentane to afford **1b** (1.27 g, 8.44 mmol, 84%). This compound is known (58). <sup>1</sup>H NMR (400 MHz, CDCl<sub>3</sub>) δ 7.48 (d, *J* = 7.8 Hz, 2H), 7.23 (d, *J* = 7.4 Hz, 2H), 4.46 (hept, *J* = 3.7 Hz, 1H), 2.39 (s, 3H), 0.37 (d, *J* = 3.7 Hz, 6H).

##### (4-Methoxyphenyl)dimethylsilane (1c)

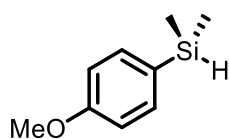

In a 100 mL round-bottom flask, chlorodimethylsilane (1.11 mL, 10.0 mmol) in THF (6 mL) was cooled to 0 °C. A solution of 4-methoxyphenylmagnesium bromide (24 mL, 0.5 M in THF) was added dropwise slowly over 15 min. Then reaction was allowed to warm to room temperature and stirred for 8 hours. The reaction mixture was quenched with NH<sub>4</sub>Cl (5 mL, sat. aq.) and the product was extracted with Et<sub>2</sub>O (15 mL × 3). The organic layer was washed with water (20 mL), brine (20 mL), dried over MgSO<sub>4</sub>, and then concentrated under reduced pressure (200 torr). The crude product was purified by silica column chromatography with pentane / Et<sub>2</sub>O (10: 1) to afford **1c** (1.60 g, 9.62 mmol, 96%). This compound is known (58). <sup>1</sup>H NMR (400 MHz, CDCl<sub>3</sub>) δ 7.51 (d, *J* = 8.7 Hz, 2H), 6.96 (d, *J* = 8.6 Hz, 2H), 4.75-4.19 (m, 1H), 3.85 (s, 3H), 0.37 (d, *J* = 3.8 Hz, 6H).

##### (4-Chlorophenyl)dimethylsilane (1d)

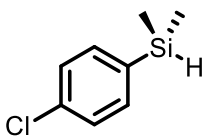

In a 100 mL round-bottom flask, chlorodimethylsilane (1.11 mL, 10.0 mmol) in THF (6 mL) was cooled to 0 °C. A solution of 4-chlorophenylmagnesium bromide (24 mL, 0.5 M in THF) was added dropwise slowly over 15 min. Then reaction was allowed to warm to room temperature and stirred for 8 hours. The reaction mixture was quenched with

NH<sub>4</sub>Cl (5 mL, sat. aq.) and the product was extracted with Et<sub>2</sub>O (15 mL × 3). The organic layer was washed with water (20 mL), brine (20 mL), dried over MgSO<sub>4</sub>, and then concentrated under reduced pressure (200 torr). The crude product was purified by silica column chromatography with pentane to afford **1d** (1.27 g, 7.45 mmol, 75%). This compound is known (58). <sup>1</sup>H NMR (400 MHz, CDCl<sub>3</sub>) δ 7.46 (d, *J* = 8.3 Hz, 2H), 7.34 (d, *J* = 8.2 Hz, 2H), 4.41 (hept, *J* = 3.8 Hz, 1H), 0.34 (d, *J* = 3.7 Hz, 6H).

#### (4-(Trifluoromethyl)phenyl)dimethylsilane (**1e**)

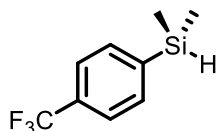

In a 100 mL round-bottom flask, 1-bromo-4-(trifluoromethyl)benzene (1.4 mL, 10.0 mmol) in THF (15 mL) was cooled to -78 °C. *n*-BuLi (7.5 mL, 1.6 M in hexane) was added dropwise slowly over 15 min. The resulting mixture was stirred at -78 °C for 2 hours before the dropwise addition of chlorodimethylsilane (1.0 mL, 9.0 mmol). The reaction was allowed to warm to room temperature and stirred for 8 hours. The reaction mixture was quenched with NH<sub>4</sub>Cl (5 mL, sat. aq.) and the product was extracted with Et<sub>2</sub>O (15 mL × 3). The organic layer was washed with water (20 mL), brine (20 mL), dried over MgSO<sub>4</sub>, and then concentrated under reduced pressure (200 torr). The crude product was purified by silica column chromatography with pentane to afford **1e** (0.81 g, 3.97 mmol, 40%). This compound is known (58). <sup>1</sup>H NMR (400 MHz, CDCl<sub>3</sub>) δ 7.66 (d, *J* = 7.7 Hz, 2H), 7.60 (d, *J* = 7.9 Hz, 2H), 4.46 (hept, *J* = 3.8 Hz, 1H), 0.38 (d, *J* = 3.8 Hz, 6H).

#### (4-(Chloromethyl)phenyl)dimethylsilane (**1f**)

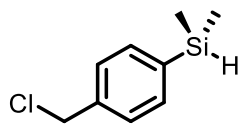

In a 250 mL round-bottom flask, (4-bromophenyl)methanol (5.61 g, 30.0 mmol) in THF (100 mL) was cooled to -78 °C. *n*-BuLi (30.0 mL, 2.5 M in hexane) was added dropwise slowly over 30 min. The resulting mixture was stirred at -78 °C for 2 hours before the dropwise addition of chlorodimethylsilane (4.5 mL, 40.0 mmol). The reaction was allowed to warm to room temperature and stirred for 8 hours. The reaction mixture was quenched with NH<sub>4</sub>Cl (50 mL, sat. aq.) and the product was extracted with DCM (50 mL × 3). The organic layer was washed with water (20 mL), brine (20 mL), dried over MgSO<sub>4</sub>, and then concentrated under reduced pressure (100 torr). The crude product was purified by silica column chromatography with EtOAc / hexane (1:3) to afford (4-(dimethylsilyl)phenyl)methanol (2.96 g, 17.8 mmol, 59%). This compound is known (59). <sup>1</sup>H NMR (400 MHz, CDCl<sub>3</sub>) δ 7.55 (d, *J* = 8.0 Hz, 2H), 7.37 (d, *J* = 8.1 Hz, 2H), 4.70 (s, 2H), 4.43 (hept, *J* = 3.7 Hz, 1H), 0.35 (d, *J* = 3.8 Hz, 6H).

To a solution of (4-(dimethylsilyl)phenyl)methanol (498.9 mg, 3.0 mmol) in DCM (4 mL) were added triethylamine (0.5 mL, 3.6 mmol) and 4-methylbenzenesulfonyl chloride (629.1 mg, 3.3 mmol). The reaction mixture was stirred at room temperature for 8 hours. The reaction was then diluted with DCM (10 mL) and washed with water (20 mL), brine (20 mL), dried over MgSO<sub>4</sub>, and the organic layer was concentrated under reduced pressure (100 torr). The crude product was purified by silica column chromatography with pentane to afford **1f** (0.22 g, 1.19 mmol, 40%). <sup>1</sup>H NMR (400

MHz, CDCl<sub>3</sub>)  $\delta$  7.55 (d,  $J$  = 8.0 Hz, 2H), 7.39 (d,  $J$  = 7.9 Hz, 2H), 4.59 (s, 2H), 4.43 (hept,  $J$  = 3.8 Hz, 1H), 0.35 (d,  $J$  = 3.8 Hz, 6H). HRMS (FAB)  $m/z$ : 183.0399 ((M+H)–H<sub>2</sub><sup>+</sup>); calc. for C<sub>9</sub>H<sub>12</sub>SiCl: 183.0397.

#### Methyl 4-(dimethylsilyl)benzoate (**1g**)

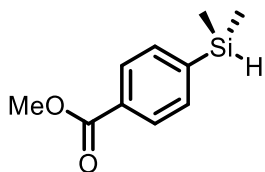

In a 100 mL round-bottom flask, methyl 4-iodobenzoate (2.62 g, 10.0 mmol) in THF (15 mL) was cooled to  $-78$  °C. *i*-PrMgCl (6 mL, 2.0 M in Et<sub>2</sub>O) was added dropwise slowly over 5 min. The resulting mixture was allowed to warm to  $-40$  °C in 2 hours and maintained at  $-40$  °C for another 2 hours before the dropwise addition of chlorodimethylsilane (1.2 mL, 11.0 mmol). The reaction was allowed to warm to room temperature and stirred for 8 hours. The reaction mixture was quenched with NH<sub>4</sub>Cl (5 mL, sat. aq.) and the product was extracted with DCM (15 mL  $\times$  3). The organic layer was washed with water (20 mL), brine (20 mL), dried over MgSO<sub>4</sub>, and then concentrated under reduced pressure (100 torr). The mixture was dissolved in Et<sub>2</sub>O (5 mL) and treated with hexane (25 mL). This crashed out most of the starting material, which was removed by filtration. The filtrate was collected, concentrated under reduced pressure, and purified by silica column chromatography with EtOAc / hexane (1:20) to afford **1g** (0.88 g, 4.53 mmol, 45%). <sup>1</sup>H NMR (400 MHz, CDCl<sub>3</sub>)  $\delta$  8.00 (d,  $J$  = 8.1 Hz, 2H), 7.62 (d,  $J$  = 8.2 Hz, 2H), 4.45 (hept,  $J$  = 3.8 Hz, 1H), 3.92 (s, 3H), 0.37 (d,  $J$  = 3.8 Hz, 6H). <sup>13</sup>C NMR (100 MHz, CDCl<sub>3</sub>)  $\delta$  167.35, 143.92, 134.13, 130.78, 128.72, 52.27, –3.84. HRMS (FAB)  $m/z$ : 195.0843 (M+H<sup>+</sup>); calc. for C<sub>10</sub>H<sub>15</sub>SiO<sub>2</sub>: 195.0841.

#### 4-(dimethylsilyl)-*N,N*-dimethylbenzamide (**1h**)

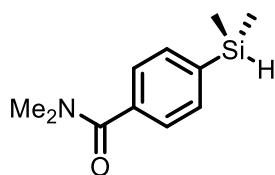

To a solution of dimethylamine hydrochloride (2.45 g, 30.0 mmol) in DCM (50 mL) was added triethylamine (4.2 mL, 30.0 mmol). The mixture was stirred for 30 min before the addition of 4-iodobenzoic acid (6.20 g, 25.0 mmol) and 1-(3-dimethylaminopropyl)-3-ethylcarbodiimide (EDC, 4.66 g, 30.0 mmol). The reaction was stirred for 8 hours at room temperature. Then the reaction mixture was washed with water (50 mL), HCl (aq., 1 M, 50 mL), NaHCO<sub>3</sub> (sat. aq., 50 mL) and brine (50 mL), dried over MgSO<sub>4</sub>, and then concentrated under reduced pressure (50 torr). The crude product was dissolved in Et<sub>2</sub>O (5 mL) and treated with hexane (50 mL). The target product 4-iodo-*N,N*-dimethylbenzamide (6.88 g, 25.0 mmol, quantitative) crashed out and was collected by filtration.

In a 100 mL round-bottom flask, 4-iodo-*N,N*-dimethylbenzamide (1.65 g, 6.0 mmol) in THF (15 mL) was cooled to  $-78$  °C. *i*-PrMgCl (6 mL, 2.0 M in Et<sub>2</sub>O) was added dropwise slowly over 5 min. The resulting mixture was allowed to warm to  $-40$  °C within 2 hours and maintained at  $-40$  °C for another 2 hours before the dropwise addition of chlorodimethylsilane (1.3 mL, 12.0 mmol). The reaction was allowed to warm to room temperature and stirred for 8 hours. The reaction mixture was quenched with NH<sub>4</sub>Cl (5 mL, sat. aq.) and the product was extracted with DCM (15 mL  $\times$  3). The organic layer

was washed with water (20 mL), brine (20 mL), dried over MgSO<sub>4</sub>, and then concentrated under reduced pressure (50 torr). The mixture was dissolved in Et<sub>2</sub>O (5 mL) and treated with hexane (25 mL). Most of the starting material crashed out and was removed by filtration. The filtrate was collected, concentrated under reduced pressure, and then purified by silica column chromatography with EtOAc / hexane (1:2) to afford **1h** (0.12 g, 0.579 mmol, 10%). <sup>1</sup>H NMR (400 MHz, CDCl<sub>3</sub>) δ 7.57 (d, *J* = 8.3 Hz, 2H), 7.39 (d, *J* = 8.3 Hz, 2H), 4.43 (hept, *J* = 3.8 Hz, 1H), 3.05 (s, 6H), 0.35 (d, *J* = 3.7 Hz, 6H). <sup>13</sup>C NMR (100 MHz, CDCl<sub>3</sub>) δ 171.74, 139.53, 137.04, 134.11, 126.42, -3.74. HRMS (FAB) *m/z*: 208.1153 (M+H<sup>+</sup>); calc. for C<sub>11</sub>H<sub>18</sub>ONSi: 208.1158.

### (3,4-Dihydro-2H-pyran-6-yl)dimethylsilane (**1i**)

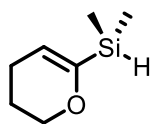

In a 100 mL round-bottom flask, 3,4-dihydro-2H-pyran (2.00 g, 24.0 mmol) in THF (1.0 mL) and pentane (40 mL) was cooled to -78 °C. *t*-BuLi (15.5 mL, 1.7 M in pentane) was added dropwise slowly over 20 min. The resulting mixture was allowed to warm to 0 °C within 2 hours and maintained at 0 °C for another 2 hours before the dropwise addition of chlorodimethylsilane (2.6 mL, 24.0 mmol). The reaction was allowed to warm to room temperature and stirred for 8 hours. The reaction mixture was quenched with NH<sub>4</sub>Cl (5 mL, sat. aq.) and the product was extracted with Et<sub>2</sub>O (15 mL × 3). The organic layer was washed with water (20 mL), brine (20 mL), dried over MgSO<sub>4</sub>, and then concentrated under reduced pressure (200 torr). The crude product was purified by silica column chromatography with Et<sub>2</sub>O / pentane (1: 30) to afford **1i** (2.80 g, 19.7 mmol, 82%). This compound is known (60). <sup>1</sup>H NMR (400 MHz, CDCl<sub>3</sub>) δ 5.09 (t, *J* = 3.8 Hz, 1H), 4.05-3.91 (m, 3H), 2.04 (td, *J* = 6.4, 3.8 Hz, 2H), 1.92-1.83 (m, 2H), 0.19 (d, *J* = 3.8 Hz, 6H).

### 4-(Dimethylsilyl)phenol (**1k**)

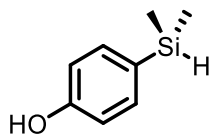

To a solution of 4-bromophenol (1.73 g, 10.0 mmol) in THF (15 mL) was added NaH (60% in mineral oil, 0.48 g, 12.0 mmol). After the mixture was stirred for 30 min, it was cooled down to -78 °C. *t*-BuLi (6 mL, 1.7 M in pentane) was added dropwise slowly over 15 min. The resulting mixture was stirred at -78 °C for 2 hours before the dropwise addition of chlorodimethylsilane (2.3 mL, 21.0 mmol). The reaction was allowed to warm to room temperature and stirred for 8 hours. The reaction mixture was quenched with NH<sub>4</sub>Cl (5 mL, sat. aq.) and the product was extracted with DCM (15 mL × 3). The organic layer was washed with water (20 mL), brine (20 mL), dried over MgSO<sub>4</sub>, and then concentrated under reduced pressure (50 torr). The crude product was purified by silica column chromatography with EtOAc / hexane (1:7) to afford **1k** (0.60 g, 3.94 mmol, 39%). This compound is known (61). <sup>1</sup>H NMR (400 MHz, CDCl<sub>3</sub>) δ 7.43 (d, *J* = 8.5 Hz, 2H), 6.85 (d, *J* = 8.5 Hz, 2H), 4.78 (s, 1H), 4.40 (hept, *J* = 3.7 Hz, 1H), 0.32 (d, *J* = 3.8 Hz, 6H). <sup>13</sup>C NMR (100 MHz, CDCl<sub>3</sub>) δ 156.61, 135.82, 128.66, 115.16, -3.38.

#### (4-(Benzyloxy)phenyl)dimethylsilane (**1ks**)

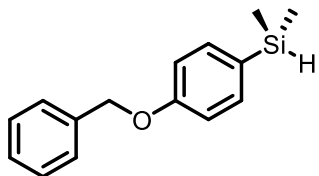

To a solution of 4-bromophenol (5.19 g, 30.0 mmol) in MeCN (50 mL) was added  $K_2CO_3$  (5.53 g, 40.0 mmol). After the mixture was stirred at 40 °C for 30 min, BnBr (3.6 mL, 30.0 mmol) was added over 2 min. The resulting mixture was stirred at 40 °C for 3 hours. The reaction mixture was washed with water (20 mL), brine (20 mL), dried over  $MgSO_4$ , and then concentrated under reduced pressure (50 torr) to afford the crude product 1-(benzyloxy)-4-bromobenzene (7.85 g, 30.0 mmol, quantitative).

In a 100 mL round-bottom flask, 1-(benzyloxy)-4-bromobenzene (6.57 g, 25.0 mmol) in THF (15 mL) was cooled to -78 °C. *t*-BuLi (19.0 mL, 1.7 M in pentane) was added dropwise slowly over 15 min. The resulting mixture was stirred at -78 °C for 2 hours before the dropwise addition of chlorodimethylsilane (3.6 mL, 32.5 mmol). The reaction was allowed to warm to room temperature and stirred for 8 hours. The reaction mixture was quenched with  $NH_4Cl$  (5 mL, sat. aq.) and the product was extracted with  $Et_2O$  (15 mL  $\times$  3). The organic layer was washed with water (20 mL), brine (20 mL), dried over  $MgSO_4$ , and then concentrated under reduced pressure (50 torr). The crude product was purified by silica column chromatography with pentane to afford **1ks** (4.02 g, 16.6 mmol, 66%).  $^1H$  NMR (400 MHz,  $CDCl_3$ )  $\delta$  7.51-7.27 (m, 7H), 7.00 (d,  $J$  = 8.6 Hz, 2H), 5.08 (s, 2H), 4.41 (hept,  $J$  = 3.7 Hz, 1H), 0.32 (d,  $J$  = 3.7 Hz, 6H). HRMS (FAB)  $m/z$ : 241.1053 (( $M+H$ )- $H_2^+$ ); calc. for  $C_{15}H_{17}OSi$ : 241.1049.

#### 4-(Dimethylsilyl)aniline (**23**)

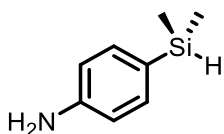

To a solution of 4-bromoaniline (3.44 g, 20.0 mmol) in DCM (30 mL) was added triethylamine (5.6 mL, 20.0 mmol) and *N,N*-dimethylpyridin-4-amine (DMAP, 244.3 mg, 2.0 mmol). After the mixture was stirred for 30 min, 1,2-bis(chlorodimethylsilyl)ethane (4.78 g, 20.0 mmol) was added in one portion. The reaction was stirred at 40 °C for 3 hours. The reaction mixture was filtrated through a pad of dry Celite quickly to remove the triethylamine hydrochloride. The resulting solution was concentrated under reduced pressure (50 torr) to afford the crude product 1-(4-bromophenyl)-2,2,5,5-tetramethyl-1,2,5-azadisilolidine. (Note: this compound is moisture sensitive and decomposed on silica.)

The crude 1-(4-bromophenyl)-2,2,5,5-tetramethyl-1,2,5-azadisilolidine in THF (30 mL) in a 100 mL round-bottom flask was cooled to -78 °C. *t*-BuLi (17.6 mL, 1.7 M in pentane) was added dropwise slowly over 15 min. The resulting mixture was stirred at -78 °C for 2 hours before the dropwise addition of chlorodimethylsilane (3.3 mL, 30.0 mmol). The reaction was allowed to warm to room temperature and stirred for 8 hours. The reaction mixture was treated with  $Et_2O$  (50 mL) to allow the inorganic salts to crash out. The suspension was filtrated through a pad of Celite and basic alumina (1:1 mixture). The resulting solution was concentrated under reduced pressure (50 torr). The crude product was loaded on silica and allowed to sit for 15 min (for removal of the nitrogen



protecting group), before purification by silica column chromatography with EtOAc / hexane (1:7) to afford **23** (1.21 g, 8.00 mmol, 40%). This compound is known (62). <sup>1</sup>H NMR (400 MHz, CDCl<sub>3</sub>) δ 7.38 (d, *J* = 8.4 Hz, 2H), 6.83 (d, *J* = 8.4 Hz, 2H), 4.84 (s, 2H), 4.38 (hept, *J* = 3.9 Hz, 1H), 0.30 (d, *J* = 3.7 Hz, 6H). <sup>13</sup>C NMR (100 MHz, CDCl<sub>3</sub>) δ 144.82, 135.48, 127.64, 116.07, -3.38.

### Benzyl (4-(dimethylsilyl)phenyl)carbamate (**23s**)

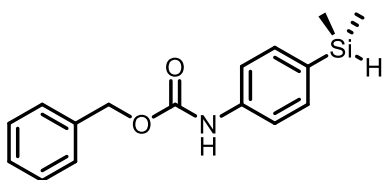

To a solution of 4-(dimethylsilyl)aniline (151.2 mg, 1.0 mmol) in DCM (3 mL) was added pyridine (162 μL, 2.0 mmol). After the mixture was stirred for 10 min, benzyl carbonochloridate (CbzCl, 170 μL, 1.2 mmol) was added in one portion. After stirring at room temperature overnight, the reaction mixture was washed with water (20 mL), brine (20 mL), dried over MgSO<sub>4</sub>, and then concentrated under reduced pressure (50 torr). The crude product was purified by silica column chromatography with EtOAc / hexane (1:7) to afford **23s** (130.4 mg, 0.457 mmol, 46%). <sup>1</sup>H NMR (400 MHz, CDCl<sub>3</sub>) δ 7.50 (d, *J* = 8.4 Hz, 2H), 7.46-7.33 (m, 5H), 6.68 (s, 1H), 5.23 (s, 2H), 4.42 (hept, *J* = 3.7 Hz, 1H), 0.34 (d, *J* = 3.7 Hz, 6H). HRMS (FAB) *m/z*: 286.1274 (M+H<sup>+</sup>); calc. for C<sub>16</sub>H<sub>20</sub>O<sub>2</sub>NSi: 286.1263.

### (4-Ethynylphenyl)dimethylsilane (**1m**)

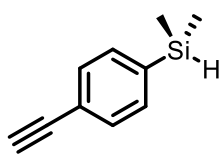

A solution of ((4-bromophenyl)ethynyl)trimethylsilane (5.06 g, 20.0 mmol) and K<sub>2</sub>CO<sub>3</sub> (5.53 g, 40.0 mmol) in MeOH (40 mL) was stirred at room temperature for 4 hours. MeOH was removed under reduced pressure, and the crude product was washed with water (30 mL) and extracted with Et<sub>2</sub>O (40 mL). The organic layer was dried over MgSO<sub>4</sub>, filtrated through a pad of silica, and concentrated under reduced pressure to afford the product 1-bromo-4-ethynylbenzene (3.21 g, 17.7 mmol, 89%).

In a 100 mL round-bottom flask, 1-bromo-4-ethynylbenzene (1.81 g, 10.0 mmol) in THF (15 mL) was cooled to -78 °C. *n*-BuLi (8.0 mL, 2.5 M in hexane) was added dropwise very slowly over 30 min. The resulting mixture was stirred at -78 °C for 2 hours before the dropwise addition of a solution of chlorodimethylsilane (1.1 mL, 10.0 mmol) in THF (20 mL). The reaction was allowed to warm to room temperature and stirred for 8 hours. The reaction mixture was quenched with NH<sub>4</sub>Cl (5 mL, sat. aq.) and the product was extracted with Et<sub>2</sub>O (15 mL × 3). The organic layer was washed with water (20 mL), brine (20 mL), dried over MgSO<sub>4</sub>, and then concentrated under reduced pressure (200 torr). The crude product was purified by distillation under reduced pressure (1.4 torr) at 45 °C (1.12 g, 6.99 mmol, 70%). This compound is known (63). <sup>1</sup>H NMR (400 MHz, CDCl<sub>3</sub>) δ 7.49 (d, *J* = 3.9 Hz, 4H), 4.42 (hept, *J* = 3.8 Hz, 1H), 3.10 (s, 1H), 0.34 (d, *J* = 3.8 Hz, 6H). <sup>13</sup>C NMR (100 MHz, CDCl<sub>3</sub>) δ 138.83, 134.01, 131.43, 122.91, 83.81, 77.85, -3.77.

### Dimethyl(4-vinylphenyl)silane (**1n**)

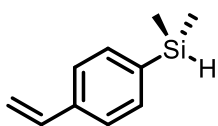

In a 100 mL round-bottom flask, 1-bromo-4-vinylbenzene (1.83 g, 10.0 mmol) in THF (15 mL) was cooled to  $-78\text{ }^{\circ}\text{C}$ . *n*-BuLi (7.5 mL, 1.6 M in hexane) was added dropwise very slowly over 30 min. The resulting mixture was stirred at  $-78\text{ }^{\circ}\text{C}$  for 2 hours before the dropwise addition of a solution of chlorodimethylsilane (1.1 mL, 10.0 mmol) in THF (20 mL). The reaction was allowed to warm to room temperature and stirred for 8 hours. The reaction mixture was quenched with  $\text{NH}_4\text{Cl}$  (5 mL, sat. aq.) and the product was extracted with  $\text{Et}_2\text{O}$  (15 mL  $\times$  3). The organic layer was washed with water (20 mL), brine (20 mL), dried over  $\text{MgSO}_4$ , and then concentrated under reduced pressure (200 torr). The crude product was purified by silica column chromatography with pentane to afford **1n** (1.29 g, 7.95 mmol, 80%). This compound is known (64).  $^1\text{H}$  NMR (400 MHz,  $\text{CDCl}_3$ )  $\delta$  7.51 (d,  $J = 8.1$  Hz, 2H), 7.41 (d,  $J = 7.9$  Hz, 2H), 6.72 (dd,  $J = 17.6, 10.9$  Hz, 1H), 5.79 (dd,  $J = 17.6, 0.9$  Hz, 1H), 5.27 (dd,  $J = 10.9, 0.9$  Hz, 1H), 4.43 (hept,  $J = 3.7$  Hz, 1H), 0.35 (d,  $J = 3.8$  Hz, 6H).

### Cyclohexa-2,5-dien-1-yldimethylsilane (**1o**)

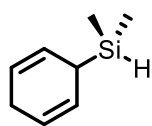

In a 100 mL round-bottom flask, cyclohexa-1,4-diene (2.3 mL, 24.0 mmol) in THF (20 mL) was cooled to  $-78\text{ }^{\circ}\text{C}$ . *t*-BuLi (15.5 mL, 1.7 M in pentane) and *N,N,N',N'*-tetramethylethane-1,2-diamine (TMEDA, 3.6 mL, 24 mmol) were added simultaneously as separate solutions, dropwise over 20 min. The resulting mixture was allowed to warm to  $-45\text{ }^{\circ}\text{C}$  in 30 min and maintained at  $-45\text{ }^{\circ}\text{C}$  for another 1 hour before the dropwise addition of chlorodimethylsilane (2.6 mL, 24.0 mmol). The reaction was allowed to warm to room temperature and stirred for 1.5 hours. The reaction mixture was quenched with  $\text{NH}_4\text{Cl}$  (5 mL, sat. aq.) and the product was extracted with  $\text{Et}_2\text{O}$  (15 mL  $\times$  3). The organic layer was washed with water (20 mL), brine (20 mL), dried over  $\text{MgSO}_4$ , and then concentrated under reduced pressure (300 torr). The crude product was purified by silica column chromatography with pentane to afford **1o** (1.24 g, 8.97 mmol, 38%). (Note: this compound is oxygen sensitive and very volatile; storage under argon at  $-20\text{ }^{\circ}\text{C}$  is recommended.) This compound is known (65).  $^1\text{H}$  NMR (400 MHz,  $\text{CDCl}_3$ )  $\delta$  5.72-5.64 (m, 2H), 5.61-5.54 (m, 2H), 3.85 (heptd,  $J = 3.5, 1.6$  Hz, 1H), 2.80-2.60 (m, 2H), 2.42-2.30 (m, 1H), 0.10 (d,  $J = 3.7$  Hz, 6H).  $^{13}\text{C}$  NMR (100 MHz,  $\text{CDCl}_3$ )  $\delta$  125.91, 122.09, 29.38, 26.50,  $-6.31$ .

### Dimethyl(naphthalen-2-yl)silane (**1p**)

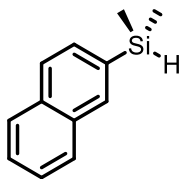

In a 100 mL round-bottom flask, 2-bromonaphthalene (2.07 g, 10.0 mmol) in THF (15 mL) was cooled to  $-78\text{ }^{\circ}\text{C}$ . *n*-BuLi (7.5 mL, 1.6 M in hexane) was added dropwise very slowly over 30 min. The resulting mixture was stirred at  $-78\text{ }^{\circ}\text{C}$  for 2 hours before the dropwise addition of a solution of chlorodimethylsilane (1.1 mL, 10.0 mmol) in THF (20 mL).

The reaction was allowed to warm to room temperature and stirred for 8 hours. The reaction mixture was quenched with  $\text{NH}_4\text{Cl}$  (5 mL, sat. aq.) and the product was extracted with  $\text{Et}_2\text{O}$  (15 mL  $\times$  3). The organic layer was washed with water (20 mL), brine (20 mL), dried over  $\text{MgSO}_4$ , and then concentrated under reduced pressure (100 torr). The crude product was purified by silica column chromatography with pentane to afford **1p** (1.69 g, 9.07 mmol, 91%). This compound is known (66).  $^1\text{H}$  NMR (400 MHz,  $\text{CDCl}_3$ )  $\delta$  8.05 (s, 1H), 7.87-7.82 (m, 3H), 7.61 (dd,  $J$  = 8.1, 1.0 Hz, 1H), 7.51-7.48 (m, 2H), 4.56 (hept,  $J$  = 3.8 Hz, 1H), 0.43 (d,  $J$  = 3.8 Hz, 6H).

### Benzofuran-2-yl dimethylsilane (**1q**)

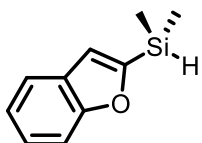

In a 100 mL round-bottom flask, benzofuran (1.18 g, 10.0 mmol) in THF (15 mL) was cooled to  $-78\text{ }^\circ\text{C}$ .  $n\text{-BuLi}$  (7.5 mL, 1.6 M in hexane) was added dropwise slowly over 20 min. The resulting mixture was allowed to warm to  $-40\text{ }^\circ\text{C}$  within 1 hour and maintained at  $-40\text{ }^\circ\text{C}$  for another 2 hours before the dropwise addition of chlorodimethylsilane (1.1 mL, 10.0 mmol). The reaction was allowed to warm to room temperature and stirred for 8 hours. The reaction mixture was quenched with  $\text{NH}_4\text{Cl}$  (5 mL, sat. aq.) and the product was extracted with  $\text{Et}_2\text{O}$  (15 mL  $\times$  3). The organic layer was washed with water (20 mL), brine (20 mL), dried over  $\text{MgSO}_4$ , and then concentrated under reduced pressure (100 torr). The crude product was purified by silica column chromatography with  $\text{Et}_2\text{O}$  / pentane (1:30) to afford **1q** (1.08 g, 6.13 mmol, 61%). This compound is known (67).  $^1\text{H}$  NMR (400 MHz,  $\text{CDCl}_3$ )  $\delta$  7.59 (ddd,  $J$  = 7.1, 1.3, 0.7 Hz, 1H), 7.52 (dd,  $J$  = 8.5, 0.5 Hz, 1H), 7.30 (ddd,  $J$  = 8.5, 7.5, 1.0 Hz, 1H), 7.22 (ddd,  $J$  = 7.5, 7.5, 1.0 Hz, 1H), 7.04 (d,  $J$  = 0.7 Hz, 1H), 4.52 (hept,  $J$  = 3.8 Hz, 1H), 0.44 (d,  $J$  = 3.8 Hz, 6H).

### Benzothiophen-2-yl dimethylsilane (**1r**)

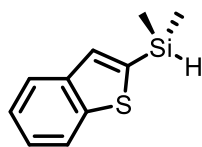

In a 100 mL round-bottom flask, benzothiophene (1.34 g, 10.0 mmol) in THF (15 mL) was cooled to  $-78\text{ }^\circ\text{C}$ .  $n\text{-BuLi}$  (7.5 mL, 1.6 M in hexane) was added dropwise slowly over 20 min. The resulting mixture was allowed to warm to  $-40\text{ }^\circ\text{C}$  within 1 hour and maintained at  $-40\text{ }^\circ\text{C}$  for another 2 hours before the dropwise addition of chlorodimethylsilane (1.1 mL, 10.0 mmol). The reaction was allowed to warm to room temperature and stirred for 8 hours. The reaction mixture was quenched with  $\text{NH}_4\text{Cl}$  (5 mL, sat. aq.) and the product was extracted with  $\text{Et}_2\text{O}$  (15 mL  $\times$  3). The organic layer was washed with water (20 mL), brine (20 mL), dried over  $\text{MgSO}_4$ , and then concentrated under reduced pressure (100 torr). The crude product was purified by silica column chromatography with pentane to afford **1r** (1.76 g, 9.14 mmol, 91%).  $^1\text{H}$  NMR (400 MHz,  $\text{CDCl}_3$ )  $\delta$  7.92-7.86 (m, 1H), 7.86-7.79 (m, 1H), 7.53 (s, 1H), 7.38-7.30 (m, 2H), 4.63 (hept,  $J$  = 3.7 Hz, 1H), 0.46 (d,  $J$  = 3.7 Hz, 6H).  $^{13}\text{C}$  NMR (100 MHz,  $\text{CDCl}_3$ )  $\delta$  143.87, 141.08, 138.57, 132.18, 124.47, 124.20, 123.63, 122.32,  $-2.93$ . HRMS (FAB)  $m/z$ : 191.0354 ( $\text{M}^+\text{H}^-$ ); calc. for  $\text{C}_{10}\text{H}_{12}\text{SSi}$ : 191.0351.

## V. Synthesis and Characterization of Authentic Organosilicon Products

Racemic standard references of organosilicon products were prepared using rhodium-catalyzed Si–H insertion reactions, following the general procedure described below:

### General procedure for rhodium-catalyzed Si–H insertion

To a 20 mL vial or 25 mL flask was added silane (1.0 mmol, 1.0 equiv.),  $\text{Rh}_2(\text{OAc})_4$  (4.4 mg, 1 mol%) and DCM (5 mL). The mixture was cooled to  $-78\text{ }^\circ\text{C}$ , after which diazo compound (1.0 mmol, 1.0 equiv.) was added dropwise to the solution. The reaction was allowed to slowly warm up to room temperature in 8 hours and stirred at room temperature for another 4 hours. Evaporation of the organic solvent and purification by silica column chromatography using EtOAc and hexane as eluents afforded organosilicon products **3–20** in 20–70% yields.

Organosilicon compounds **21** and **22** were prepared by rhodium-catalyzed Si–H insertion between Me-EDA and the corresponding *O*- or *N*-protected silane (**1ks** or **23s**) to give **21a** or **22a**, followed by deprotection under standard palladium-catalyzed hydrogenation condition (10% Pd/C in ethanol under  $\text{H}_2$  atmosphere at room temperature for 16 hours). The hydrogenation reaction afforded **21** and **22** in 96% and 88% yield, respectively.

### Ethyl 2-(dimethyl(phenyl)silyl)propanoate (**3**)

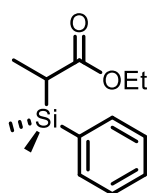

$^1\text{H}$  NMR (400 MHz,  $\text{CDCl}_3$ )  $\delta$  7.55–7.46 (m, 2H), 7.43–7.32 (m, 3H), 4.02 (q,  $J = 7.1$  Hz, 2H), 2.25 (q,  $J = 7.1$  Hz, 1H), 1.17–1.11 (m, 6H), 0.37 (d,  $J = 0.6$  Hz, 6H).  $^{13}\text{C}$  NMR (100 MHz,  $\text{CDCl}_3$ )  $\delta$  176.13, 136.42, 133.99, 129.57, 127.92, 59.96, 30.14, 14.43, 11.42,  $-3.92$ ,  $-4.77$ . HRMS (FAB)  $m/z$ : 236.1234 ( $\text{M}^+$ ); calc. for  $\text{C}_{13}\text{H}_{20}\text{O}_2\text{Si}$ : 236.1233.

### Ethyl 2-(dimethyl(*p*-tolyl)silyl)propanoate (**4**)

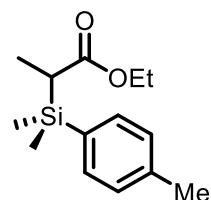

$^1\text{H}$  NMR (400 MHz,  $\text{CDCl}_3$ )  $\delta$  7.40 (d,  $J = 7.9$  Hz, 2H), 7.18 (d,  $J = 7.5$  Hz, 2H), 4.03 (q,  $J = 7.1$  Hz, 2H), 2.35 (s, 3H), 2.24 (q,  $J = 7.1$  Hz, 1H), 1.19–1.11 (m, 6H), 0.35 (d,  $J = 0.4$  Hz, 6H).  $^{13}\text{C}$  NMR (100 MHz,  $\text{CDCl}_3$ )  $\delta$  176.21, 139.51, 134.04, 132.72, 128.77, 59.94, 30.22, 21.63, 14.47, 11.44,  $-3.75$ ,  $-4.75$ .  $^{29}\text{Si}$  NMR (79 MHz,  $\text{CDCl}_3$ )  $\delta$  0.19. HRMS (FAB)  $m/z$ : 250.1391 ( $\text{M}^+$ ); calc. for  $\text{C}_{14}\text{H}_{22}\text{O}_2\text{Si}$ : 250.1389.

**Ethyl 2-(dimethyl(4-methoxyphenyl)silyl)propanoate (5)**

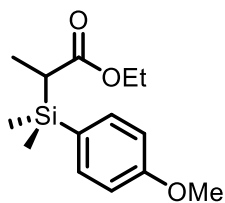

$^1\text{H}$  NMR (400 MHz,  $\text{CDCl}_3$ )  $\delta$  7.43 (d,  $J = 8.6$  Hz, 2H), 6.91 (d,  $J = 8.6$  Hz, 2H), 4.03 (q,  $J = 7.1$  Hz, 2H), 3.81 (s, 3H), 2.22 (q,  $J = 7.1$  Hz, 1H), 1.20-1.10 (m, 6H), 0.35 (s, 6H).  $^{13}\text{C}$  NMR (100 MHz,  $\text{CDCl}_3$ )  $\delta$  176.24, 160.84, 135.49, 127.18, 113.70, 59.93, 55.18, 30.37, 14.49, 11.45,  $-3.72$ ,  $-4.58$ .  $^{29}\text{Si}$  NMR (79 MHz,  $\text{CDCl}_3$ )  $\delta$   $-0.10$ . HRMS (FAB)  $m/z$ : 266.1332 ( $\text{M}^+$ ); calc. for  $\text{C}_{14}\text{H}_{22}\text{O}_3\text{Si}$ : 266.1338.

**Ethyl 2-(dimethyl(4-chlorophenyl)silyl)propanoate (6)**

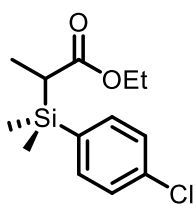

$^1\text{H}$  NMR (400 MHz,  $\text{CDCl}_3$ )  $\delta$  7.43 (d,  $J = 8.4$  Hz, 2H), 7.34 (d,  $J = 8.3$ , 1.9 Hz, 2H), 4.02 (q,  $J = 7.1$  Hz, 2H), 2.23 (q,  $J = 7.1$  Hz, 1H), 1.17-1.11 (m, 6H), 0.36 (s, 6H).  $^{13}\text{C}$  NMR (100 MHz,  $\text{CDCl}_3$ )  $\delta$  175.87, 135.98, 135.36, 134.75, 128.19, 60.06, 30.03, 14.45, 11.38,  $-4.02$ ,  $-4.61$ .  $^{29}\text{Si}$  NMR (79 MHz,  $\text{CDCl}_3$ )  $\delta$  0.59. HRMS (FAB)  $m/z$ : 270.0847 ( $\text{M}^+$ ); calc. for  $\text{C}_{13}\text{H}_{19}\text{O}_2\text{SiCl}$ : 270.0843.

**Ethyl 2-(dimethyl(4-trifluoromethylphenyl)silyl)propanoate (7)**

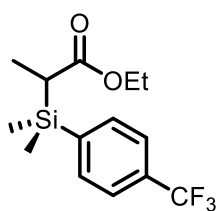

$^1\text{H}$  NMR (400 MHz,  $\text{CDCl}_3$ )  $\delta$  7.61 (d,  $J = 8.4$  Hz, 4H), 4.01 (qd,  $J = 7.2$ , 0.7 Hz, 2H), 2.27 (q,  $J = 7.2$  Hz, 1H), 1.16 (d,  $J = 7.2$  Hz, 3H), 1.12 (t,  $J = 7.1$  Hz, 3H), 0.40 (d,  $J = 1.3$  Hz, 6H).  $^{13}\text{C}$  NMR (100 MHz,  $\text{CDCl}_3$ )  $\delta$  141.49, 134.32, 131.52 (q,  $J_{\text{C-F}} = 32.3$  Hz), 124.26 (q,  $J_{\text{C-F}} = 272.2$  Hz), 124.43 (q,  $J_{\text{C-F}} = 3.8$  Hz), 60.16, 29.96, 14.39, 11.39,  $-4.18$ ,  $-4.65$ .  $^{29}\text{Si}$  NMR (79 MHz,  $\text{CDCl}_3$ )  $\delta$  1.01. HRMS (FAB)  $m/z$ : 304.1119 ( $\text{M}^+$ ); calc. for  $\text{C}_{14}\text{H}_{19}\text{O}_2\text{SiF}_3$ : 304.1106.

**Ethyl 2-(dimethyl(4-chloromethylphenyl)silyl)propanoate (8)**

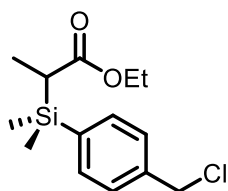

$^1\text{H}$  NMR (400 MHz,  $\text{CDCl}_3$ )  $\delta$  7.51 (d,  $J = 8.0$  Hz, 2H), 7.38 (d,  $J = 7.9$  Hz, 2H), 4.58 (s, 2H), 4.02 (q,  $J = 7.1$  Hz, 2H), 2.25 (q,  $J = 7.1$  Hz, 1H), 1.18-1.08 (m, 6H), 0.37 (d,  $J = 1.2$  Hz, 6H).  $^{13}\text{C}$  NMR (100 MHz,  $\text{CDCl}_3$ )  $\delta$  175.98, 138.72, 136.92, 134.44, 128.02, 60.02, 46.23, 30.05, 14.44, 11.41,  $-3.97$ ,  $-4.70$ .  $^{29}\text{Si}$  NMR (79 MHz,  $\text{CDCl}_3$ )  $\delta$  0.59. HRMS (FAB)  $m/z$ : 283.0927 ( $(\text{M}+\text{H})-\text{H}_2^+$ ); calc. for  $\text{C}_{14}\text{H}_{20}\text{O}_2\text{SiCl}$ : 283.0921.

**Methyl 4-((1-ethoxy-1-oxopropan-2-yl)dimethylsilyl)benzoate (9)**

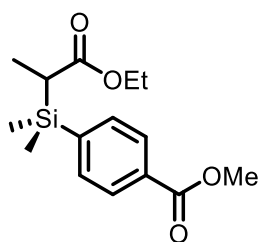

$^1\text{H}$  NMR (400 MHz,  $\text{CDCl}_3$ )  $\delta$  8.00 (d,  $J = 8.3$  Hz, 2H), 7.58 (d,  $J = 8.3$  Hz, 2H), 4.01 (qd,  $J = 7.1, 0.9$  Hz, 2H), 3.92 (s, 3H), 2.27 (q,  $J = 7.2$  Hz, 1H), 1.19-1.05 (m, 6H), 0.39 (d,  $J = 1.4$  Hz, 6H).  $^{13}\text{C}$  NMR (100 MHz,  $\text{CDCl}_3$ )  $\delta$  175.77, 167.27, 142.78, 134.01, 131.00, 128.64, 60.07, 52.31, 29.88, 14.44, 11.37, -4.13, -4.71.  $^{29}\text{Si}$  NMR (79 MHz,  $\text{CDCl}_3$ )  $\delta$  0.98. HRMS (FAB)  $m/z$ : 294.1276 ( $\text{M}^+$ ); calc. for  $\text{C}_{15}\text{H}_{22}\text{O}_4\text{Si}$ : 294.1287.

**Ethyl 2-((4-(dimethylcarbamoyl)phenyl)dimethylsilyl)propanoate (10)**

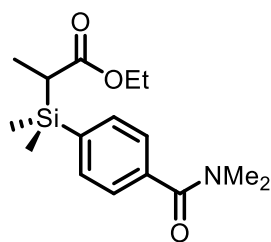

$^1\text{H}$  NMR (400 MHz,  $\text{CDCl}_3$ )  $\delta$  7.54 (d,  $J = 8.0$  Hz, 2H), 7.39 (d,  $J = 8.0$  Hz, 2H), 4.03 (q,  $J = 7.1$  Hz, 2H), 3.11 (s, 3H), 2.97 (s, 3H), 2.26 (q,  $J = 7.2$  Hz, 1H), 1.20-1.10 (m, 6H), 0.37 (s, 6H).  $^{13}\text{C}$  NMR (100 MHz,  $\text{CDCl}_3$ )  $\delta$  175.94, 171.59, 138.39, 137.38, 134.01, 126.37, 60.05, 39.67, 35.45, 29.95, 14.49, 11.41, -3.92, -4.75. HRMS (FAB)  $m/z$ : 308.1689 ( $\text{M}+\text{H}^+$ ); calc. for  $\text{C}_{16}\text{H}_{26}\text{NO}_3\text{Si}$ : 308.1682.

**Ethyl 2-((naphthalen-2-yl)dimethylsilyl)propanoate (11)**

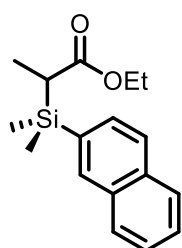

$^1\text{H}$  NMR (400 MHz,  $\text{CDCl}_3$ )  $\delta$  8.00 (s, 1H), 7.87-7.80 (m, 3H), 7.57 (dd,  $J = 8.2, 0.8$  Hz, 1H), 7.53-7.46 (m, 2H), 4.02 (q,  $J = 7.1$  Hz, 2H), 2.34 (q,  $J = 7.1$  Hz, 1H), 1.18 (d,  $J = 7.1$  Hz, 3H), 1.11 (t,  $J = 7.1$  Hz, 3H), 0.46 (d,  $J = 2.0$  Hz, 6H).  $^{13}\text{C}$  NMR (100 MHz,  $\text{CDCl}_3$ )  $\delta$  176.14, 134.88, 133.99, 133.92, 132.92, 130.03, 128.23, 127.84, 127.16, 126.70, 126.15, 60.01, 30.18, 14.44, 11.50, -3.76, -4.71.  $^{29}\text{Si}$  NMR (79 MHz,  $\text{CDCl}_3$ )  $\delta$  0.76. HRMS (FAB)  $m/z$ : 286.1395 ( $\text{M}^+$ ); calc. for  $\text{C}_{17}\text{H}_{22}\text{O}_2\text{Si}$ : 286.1389.

**Ethyl 2-((benzofuran-2-yl)dimethylsilyl)propanoate (12)**

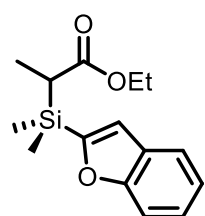

$^1\text{H}$  NMR (400 MHz,  $\text{CDCl}_3$ )  $\delta$  7.58 (ddd,  $J = 7.7, 1.3, 0.7$  Hz, 1H), 7.50 (dd,  $J = 8.2, 0.9$  Hz, 1H), 7.29 (ddd,  $J = 8.4, 7.2, 1.4$  Hz, 1H), 7.21 (ddd,  $J = 8.2, 7.8, 1.0$  Hz, 1H), 7.05 (d,  $J = 1.0$  Hz, 1H), 4.07 (qd,  $J = 7.2, 1.2$  Hz, 2H), 2.38 (q,  $J = 7.2$  Hz, 1H), 1.24 (d,  $J = 7.1$  Hz, 3H), 1.14 (t,  $J = 7.1$  Hz, 3H), 0.44 (d,  $J = 1.9$  Hz, 6H).  $^{13}\text{C}$  NMR (100 MHz,  $\text{CDCl}_3$ )  $\delta$  175.57, 159.85, 158.31, 127.82, 124.84, 122.58, 121.29, 117.93, 111.48, 60.22, 29.42, 14.42, 11.24, -4.32, -5.05.  $^{29}\text{Si}$  NMR (79 MHz,  $\text{CDCl}_3$ )  $\delta$  -5.09. HRMS (FAB)  $m/z$ : 276.1182 ( $\text{M}^+$ ); calc. for  $\text{C}_{15}\text{H}_{20}\text{O}_3\text{Si}$ : 276.1169.

**Ethyl 2-(benzothiophen-2-yl)dimethylsilyl)propanoate (13)**

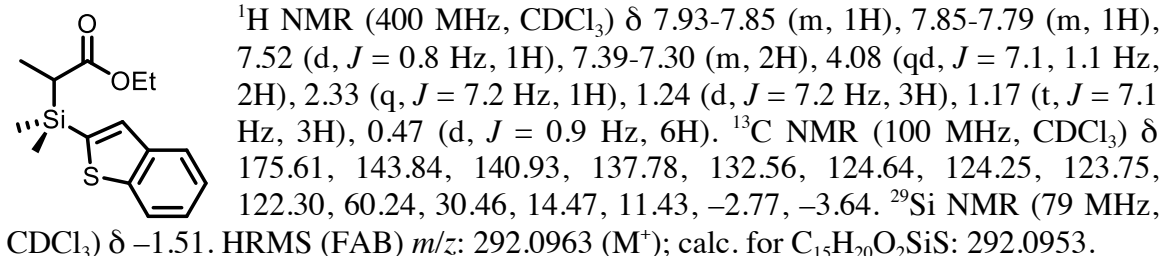

**Ethyl 2-(benzyl)dimethylsilyl)propanoate (14)**

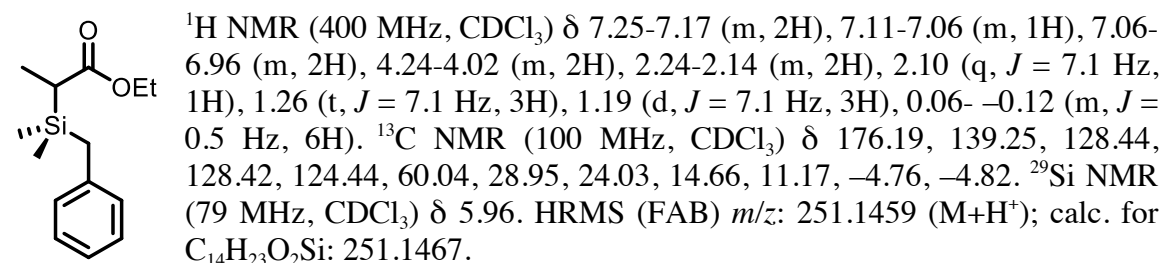

**Ethyl 2-(cyclohexa-2,5-dien-1-yl)dimethylsilyl)propanoate (15)**

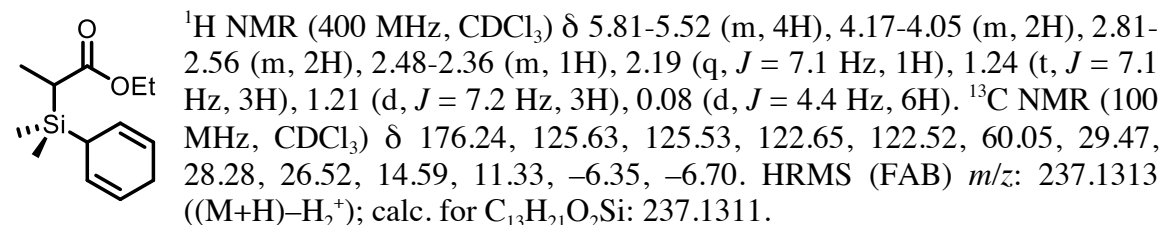

**Ethyl 2-((4-ethynylphenyl)dimethylsilyl)butanoate (16)**

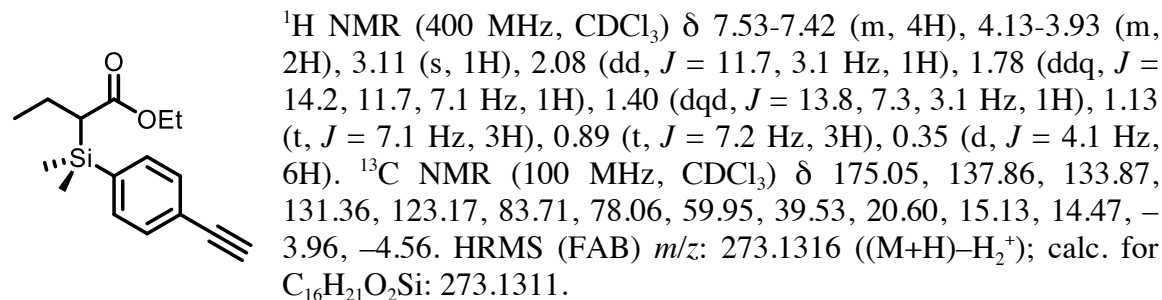

**Isopropyl 2-((4-ethynylphenyl)dimethylsilyl)propanoate (17)**

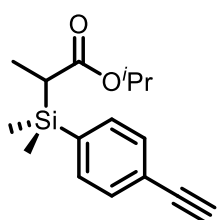

$^1\text{H}$  NMR (400 MHz,  $\text{CDCl}_3$ )  $\delta$  7.47 (app s, 4H), 4.91 (hept,  $J = 6.3$  Hz, 1H), 3.11 (s, 1H), 2.21 (q,  $J = 7.1$  Hz, 1H), 1.16 (d,  $J = 6.3$  Hz, 3H), 1.13 (d,  $J = 7.2$  Hz, 3H), 1.08 (d,  $J = 6.3$  Hz, 3H), 0.36 (d,  $J = 3.0$  Hz, 6H).  $^{13}\text{C}$  NMR (100 MHz,  $\text{CDCl}_3$ )  $\delta$  175.39, 137.82, 133.93, 131.36, 123.15, 83.73, 78.03, 67.33, 30.02, 22.16, 22.01, 11.45, -3.95, -4.69. HRMS (FAB)  $m/z$ : 275.1479 ( $\text{M}+\text{H}^+$ ); calc. for  $\text{C}_{16}\text{H}_{23}\text{O}_2\text{Si}$ : 275.1467.

**Ethyl 2-((3,4-dihydro-2H-pyran-6-yl)dimethylsilyl)propanoate (18)**

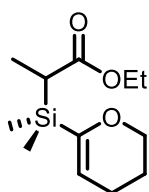

$^1\text{H}$  NMR (400 MHz,  $\text{CDCl}_3$ )  $\delta$  5.02 (t,  $J = 3.8$ , 1H), 4.16-4.02 (m, 2H), 3.90 (dd,  $J = 5.8, 4.9$  Hz, 2H), 2.17 (q,  $J = 7.1$  Hz, 1H), 2.05-1.98 (m, 2H), 1.87-1.78 (m, 2H), 1.23 (t,  $J = 7.1$  Hz, 3H), 1.18 (d,  $J = 7.1$  Hz, 3H), 0.14 (d,  $J = 8.6$  Hz, 6H).  $^{13}\text{C}$  NMR (100 MHz,  $\text{CDCl}_3$ )  $\delta$  176.26, 157.26, 112.83, 65.77, 59.91, 28.78, 22.79, 20.90, 14.61, 11.24, -4.96, -5.98.  $^{29}\text{Si}$  NMR (79 MHz,  $\text{CDCl}_3$ )  $\delta$  -4.02. HRMS (FAB)  $m/z$ : 243.1410 ( $\text{M}+\text{H}^+$ ); calc. for  $\text{C}_{12}\text{H}_{23}\text{O}_3\text{Si}$ : 243.1417.

**Ethyl 2-((4-vinylphenyl)dimethylsilyl)propanoate (19)**

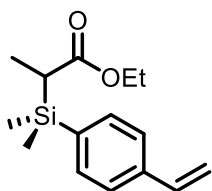

$^1\text{H}$  NMR (400 MHz,  $\text{CDCl}_3$ )  $\delta$  7.47 (d,  $J = 8.1$  Hz, 2H), 7.40 (d,  $J = 8.0$  Hz, 2H), 6.71 (dd,  $J = 17.6, 10.9$  Hz, 1H), 5.79 (dd,  $J = 17.6, 0.9$  Hz, 1H), 5.27 (dd,  $J = 10.9, 1.0$  Hz, 1H), 4.03 (q,  $J = 7.1$  Hz, 2H), 2.25 (q,  $J = 7.1$  Hz, 1H), 1.16-1.13 (m, 6H), 0.37 (s, 6H).  $^{13}\text{C}$  NMR (100 MHz,  $\text{CDCl}_3$ )  $\delta$  176.09, 138.68, 136.85, 136.00, 134.26, 125.69, 114.65, 59.99, 30.14, 14.46, 11.42, -3.87, -4.75.  $^{29}\text{Si}$  NMR (79 MHz,  $\text{CDCl}_3$ )  $\delta$  0.26. HRMS (FAB)  $m/z$ : 262.1384 ( $\text{M}^+$ ); calc. for  $\text{C}_{15}\text{H}_{22}\text{O}_2\text{Si}$ : 262.1389.

**Ethyl 2-((4-ethynylphenyl)dimethylsilyl)propanoate (20)**

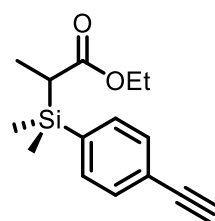

$^1\text{H}$  NMR (400 MHz,  $\text{CDCl}_3$ )  $\delta$  7.50-7.44 (m, 4H), 4.01 (qd,  $J = 7.2, 0.6$  Hz, 2H), 3.11 (s, 1H), 2.24 (q,  $J = 7.1$  Hz, 1H), 1.17-1.10 (m, 6H), 0.37 (d,  $J = 0.7$  Hz, 6H).  $^{13}\text{C}$  NMR (100 MHz,  $\text{CDCl}_3$ )  $\delta$  175.89, 137.69, 133.87, 131.36, 123.20, 83.70, 78.08, 60.04, 29.98, 14.44, 11.38, -4.10, -4.75.  $^{29}\text{Si}$  NMR (79 MHz,  $\text{CDCl}_3$ )  $\delta$  0.79. HRMS (FAB)  $m/z$ : 259.1153 ( $(\text{M}+\text{H})-\text{H}_2^+$ ); calc. for  $\text{C}_{15}\text{H}_{19}\text{O}_2\text{Si}$ : 259.1154.



**Ethyl 2-((4-(benzyloxy)phenyl)dimethylsilyl)propanoate (21a)**

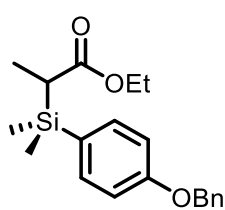

$^1\text{H NMR}$  (400 MHz,  $\text{CDCl}_3$ )  $\delta$  7.46-7.30 (m, 7H), 7.05-6.93 (m, 2H), 5.08 (s, 2H), 4.02 (q,  $J = 7.1$  Hz, 2H), 2.22 (q,  $J = 7.1$  Hz, 1H), 1.20-1.10 (m, 6H), 0.35 (s, 6H).  $^{13}\text{C NMR}$  (100 MHz,  $\text{CDCl}_3$ )  $\delta$  176.22, 160.07, 137.01, 135.51, 128.74, 128.13, 127.61, 127.52, 114.56, 69.87, 59.93, 30.35, 14.48, 11.45, -3.75, -4.57. HRMS (FAB)  $m/z$ : 342.1665 ( $\text{M}^+$ ); calc. for  $\text{C}_{20}\text{H}_{26}\text{O}_3\text{Si}$ : 342.1651.

**Ethyl 2-((4-hydroxyphenyl)dimethylsilyl)propanoate (21)**

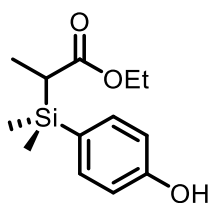

$^1\text{H NMR}$  (400 MHz,  $\text{CDCl}_3$ )  $\delta$  7.36 (d,  $J = 8.5$  Hz, 2H), 6.81 (d,  $J = 8.6$  Hz, 2H), 5.49 (s, 1H), 4.03 (qd,  $J = 7.1, 0.6$  Hz, 2H), 2.23 (q,  $J = 7.1$  Hz, 1H), 1.19-1.12 (m, 6H), 0.35 (d,  $J = 1.2$  Hz, 6H).  $^{13}\text{C NMR}$  (100 MHz,  $\text{CDCl}_3$ )  $\delta$  176.67, 157.18, 135.68, 126.90, 115.16, 60.12, 30.51, 14.46, 11.43, -3.83, -4.33. HRMS (FAB)  $m/z$ : 252.1175 ( $\text{M}^+$ ); calc. for  $\text{C}_{13}\text{H}_{20}\text{O}_3\text{Si}$ : 252.1182.

**Ethyl 2-((4-(((benzyloxy)carbonyl)amino)phenyl)dimethylsilyl)propanoate (22a)**

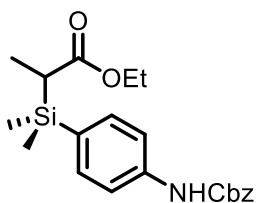

$^1\text{H NMR}$  (400 MHz,  $\text{CDCl}_3$ )  $\delta$  7.49-7.30 (m, 9H), 6.70 (s, 1H), 5.20 (s, 2H), 4.02 (q,  $J = 7.1$  Hz, 2H), 2.22 (q,  $J = 7.1$  Hz, 1H), 1.18-1.10 (m, 6H), 0.35 (s, 6H).  $^{13}\text{C NMR}$  (100 MHz,  $\text{CDCl}_3$ )  $\delta$  176.13, 153.24, 139.07, 136.06, 134.98, 130.78, 128.78, 128.56, 128.48, 117.96, 67.24, 59.98, 30.21, 14.49, 11.41, -3.83, -4.68. HRMS (FAB)  $m/z$ : 385.1710 ( $\text{M}^+$ ); calc. for  $\text{C}_{21}\text{H}_{27}\text{NO}_4\text{Si}$ : 385.1709.

**Ethyl 2-((4-aminophenyl)dimethylsilyl)propanoate (22)**

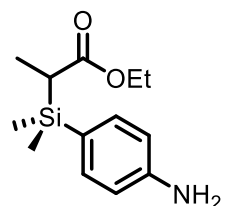

$^1\text{H NMR}$  (400 MHz,  $\text{CDCl}_3$ )  $\delta$  7.29 (d,  $J = 8.4$  Hz, 2H), 6.70 (d,  $J = 8.4$  Hz, 2H), 4.03 (q,  $J = 7.1$  Hz, 2H), 3.64 (br s, 2H), 2.20 (q,  $J = 7.1$  Hz, 1H), 1.16 (t,  $J = 7.1$  Hz, 3H), 1.13 (d,  $J = 7.1$  Hz, 3H), 0.32 (s, 6H).  $^{13}\text{C NMR}$  (100 MHz,  $\text{CDCl}_3$ )  $\delta$  176.40, 147.40, 135.32, 124.37, 114.82, 59.87, 30.47, 14.48, 11.44, -3.68, -4.68. HRMS (FAB)  $m/z$ : 251.1339 ( $\text{M}^+$ ); calc. for  $\text{C}_{13}\text{H}_{21}\text{NO}_2\text{Si}$ : 251.1342.  $[\alpha_D]^{25} = +46.1$  (c 0.505 in cyclohexane, 98% ee).

## VI. Preparative-Scale Whole-Cell Biocatalytic Reaction

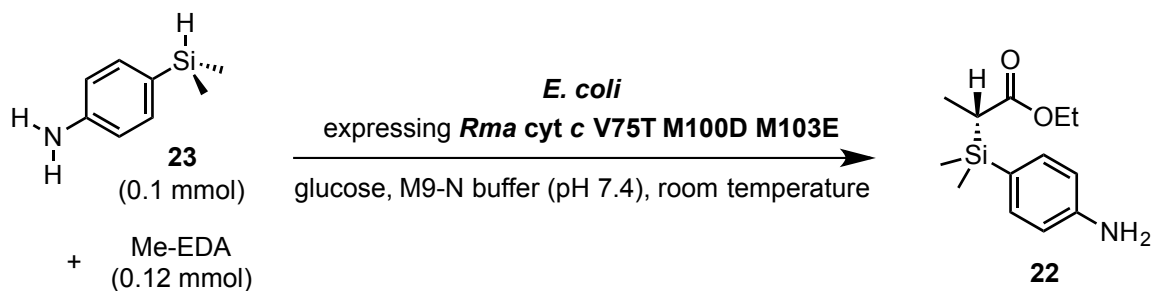

HB<sub>amp/chlor</sub> (50 mL) in a 250 mL flask was inoculated with an overnight culture (1 mL, LB<sub>amp/chlor</sub>) of recombinant *E. coli*<sup>®</sup> EXPRESS BL21(DE3) cells containing a pET22(b)+ plasmid encoding *Rma cyt c V75T M100D M103D*, and the pEC86 plasmid. The culture was shaken at 37 °C and 250 rpm (no humidity control) until the OD<sub>600</sub> was 0.6 (approximately 2 hours). The culture was placed on ice for 30 minutes, and IPTG and 5-ALA were added to final concentrations of 20 μM and 200 μM respectively. The incubator temperature was reduced to 20 °C, and the culture was allowed to shake for 20 hours at 140 rpm. Cells were pelleted by centrifugation (4 °C, 5 min, 4,000xg), resuspended in M9-N buffer and adjusted to OD<sub>600</sub> = 15. Under anaerobic conditions, to a 5 mL reaction vial was added 960 μL whole-cell solution, 40 μL glucose solution (250 mM in M9-N buffer), 15.8 μL 4-(dimethylsilyl)aniline (**23**, 0.1 mmol) and 4.9 μL Me-EDA (0.04 mmol) at room temperature. The reaction was shaken at 480 rpm. At 4 h intervals, two additional batches of whole cell (960 μL), glucose (40 μL) and Me-EDA (4.9 μL, 0.04 mmol) were added to the reaction. After the reaction was shaken for a total of 20 hours, the reaction mixture was divided between four 2 mL microcentrifuge tubes, and 0.6 mL EtOAc was added to each tube. The reaction mixtures were subjected to vortex (30 seconds) and centrifugation (14,000 rpm, 7 min) to completely separate the organic and aqueous layers. After removal of the organic layers, two additional rounds of extraction were carried out. The combined organic layers were dried over anhydrous Na<sub>2</sub>SO<sub>4</sub>, concentrated, and purified by silica column chromatography with EtOAc / hexane (1:4 to 1:2) to afford pure organosilicon product **22** (17.6 mg, 0.0700 mmol, 70% yield), together with recovered silane **23** (4.0 mg, 0.0265 mmol, 26.5%). The stereoselectivity of the product was determined as 98% *ee* by chiral SFC. The protein concentration of OD<sub>600</sub> = 15 whole-cell solution was determined to be 7.43 μM by the ferrous assay after cell lysis by sonication. The total turnover number for this reaction was 3410.

## VII. GC Standard Curves for Organosilicon Products

The analysis of product formation in enzymatic reactions was performed based on GC standard curves. The general procedure for preparing analytical samples for GC standard curves is described below:

### Sample preparation for GC standard curves

Stock solutions of chemically synthesized organosilicon products at various concentrations (20 to 200 mM in MeCN) were prepared. To a microcentrifuge tube were added 340  $\mu\text{L}$  M9-N buffer, 40  $\mu\text{L}$   $\text{Na}_2\text{S}_2\text{O}_4$  (100 mM in  $\text{dH}_2\text{O}$ ), 20  $\mu\text{L}$  organosilicon product, 20  $\mu\text{L}$  internal standard (20 mM 2-phenylethanol in cyclohexane) and 1 mL cyclohexane. The mixture was vortexed (10 seconds, 3 times) then centrifuged (14,000 $\times$ g, 5 min) to completely separate the organic and aqueous layers. The organic layer (750  $\mu\text{L}$ ) was removed for GC analysis. All data points represent the average of duplicate runs. The standard curves plot product concentration in mM (y-axis) against the ratio of product area to internal standard area on the GC (x-axis).

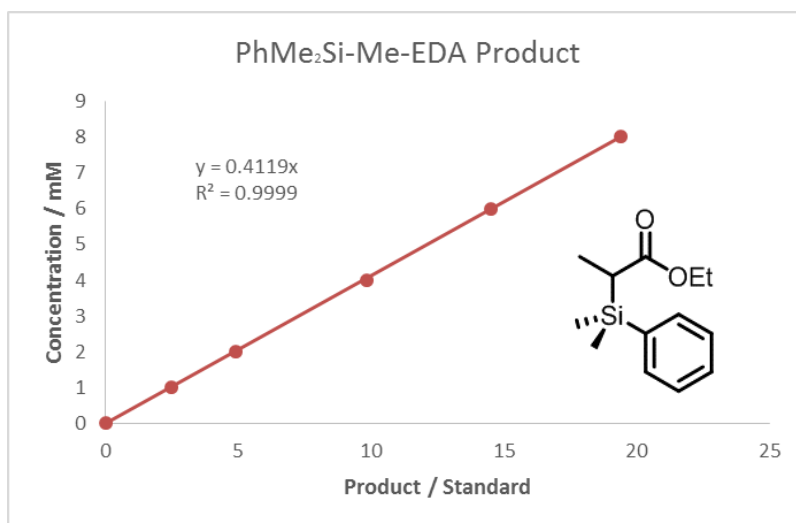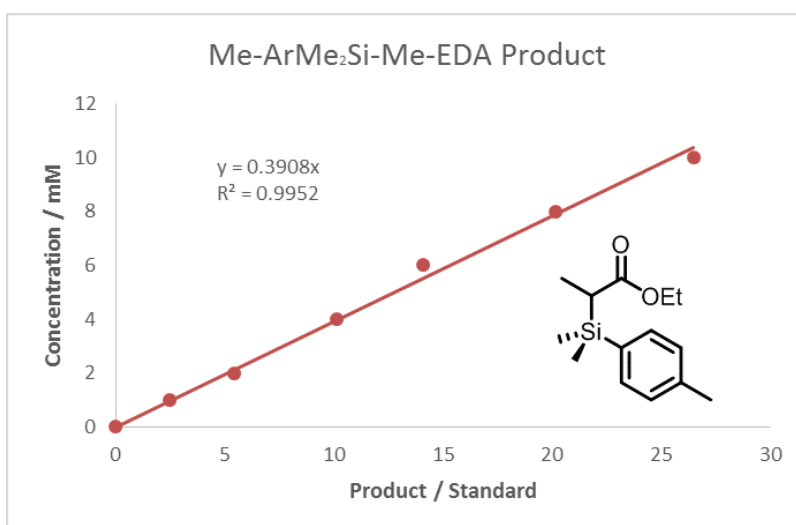

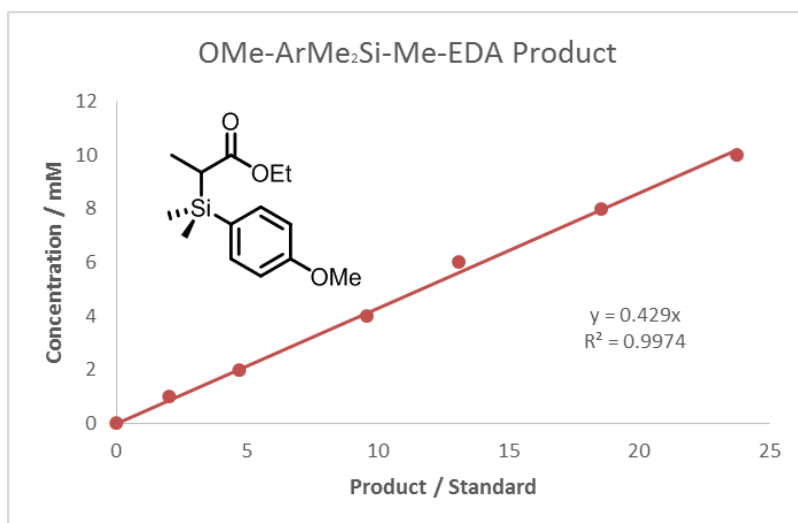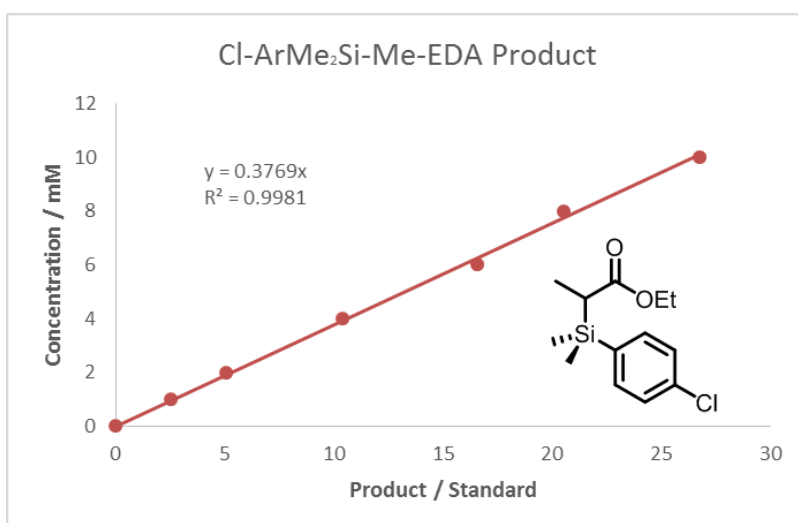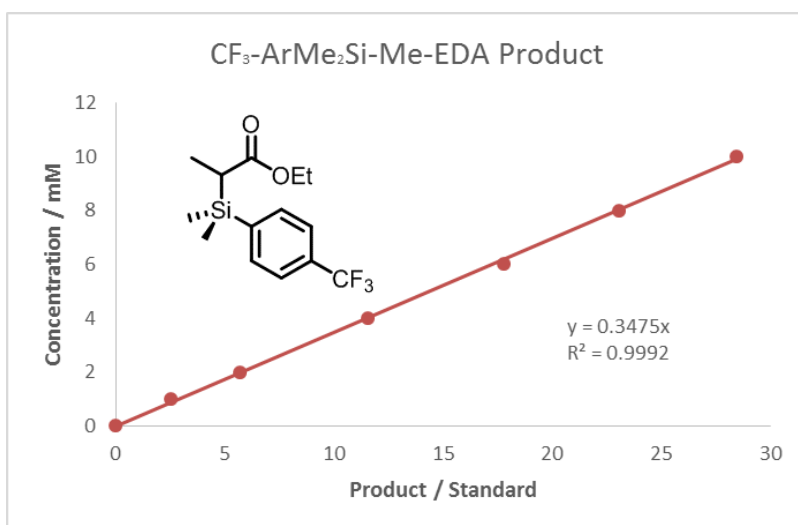

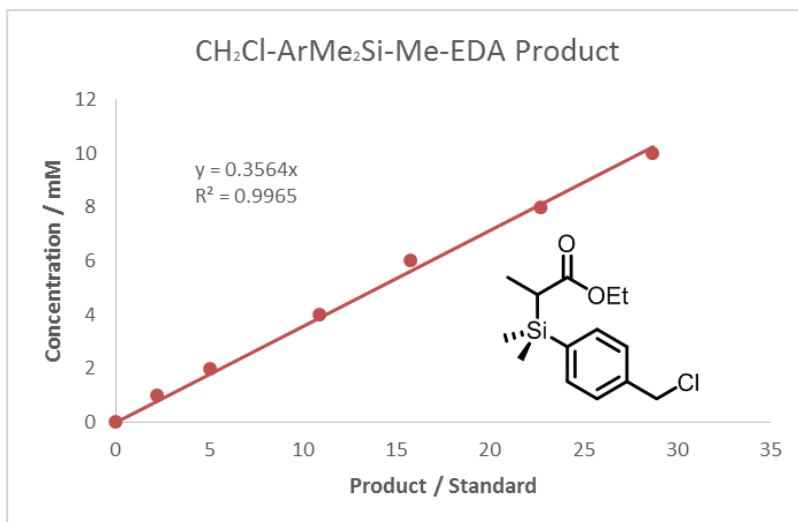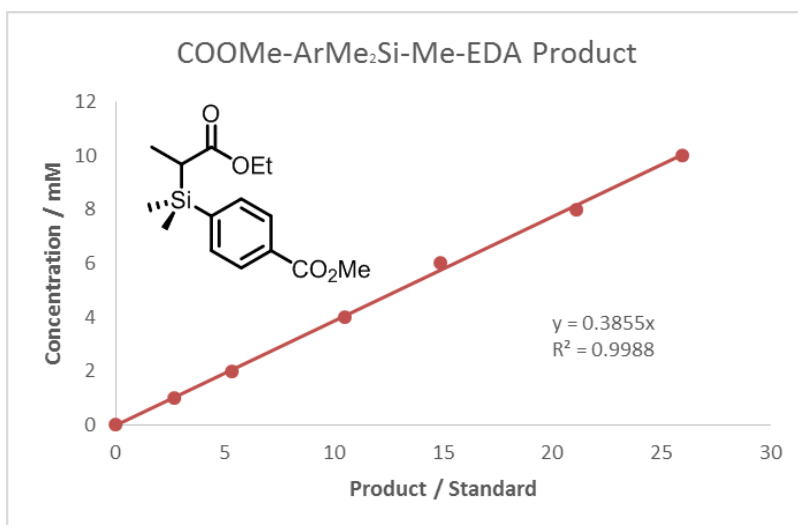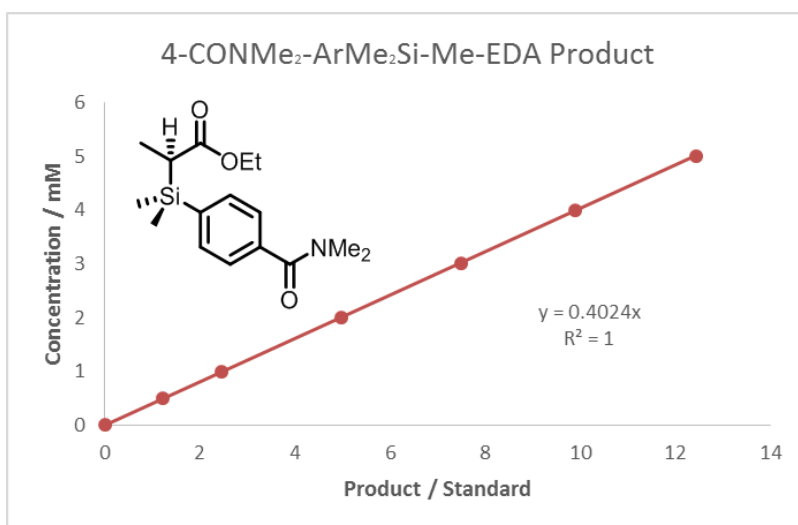

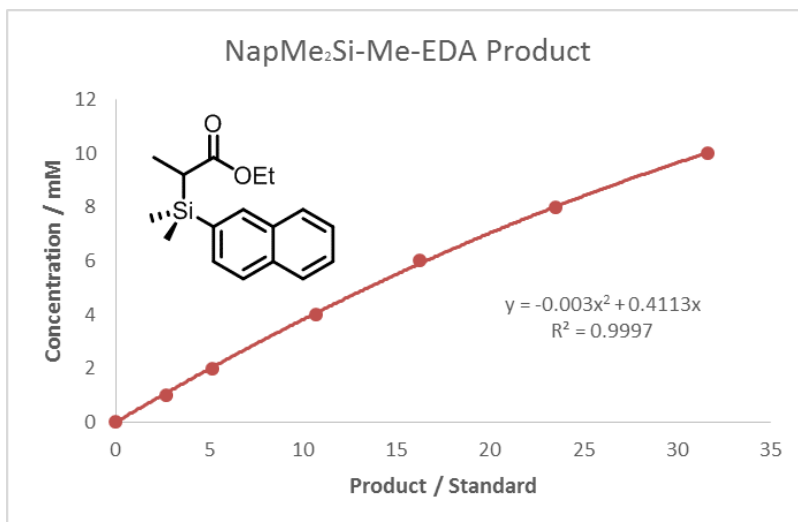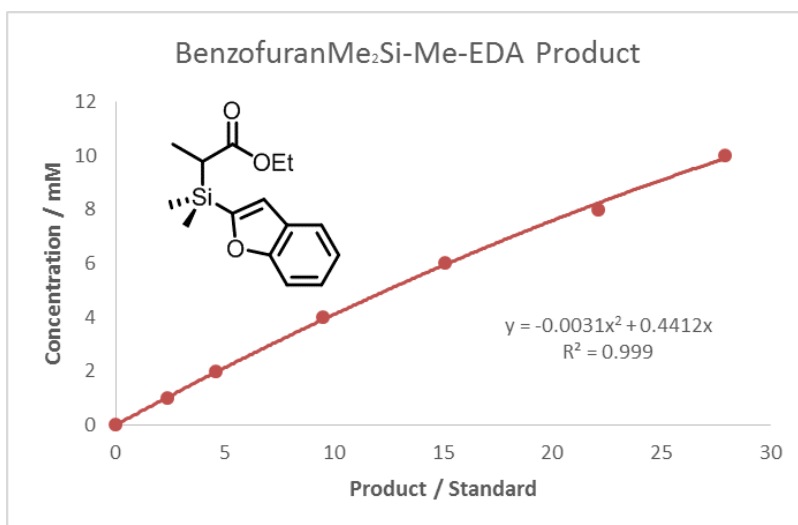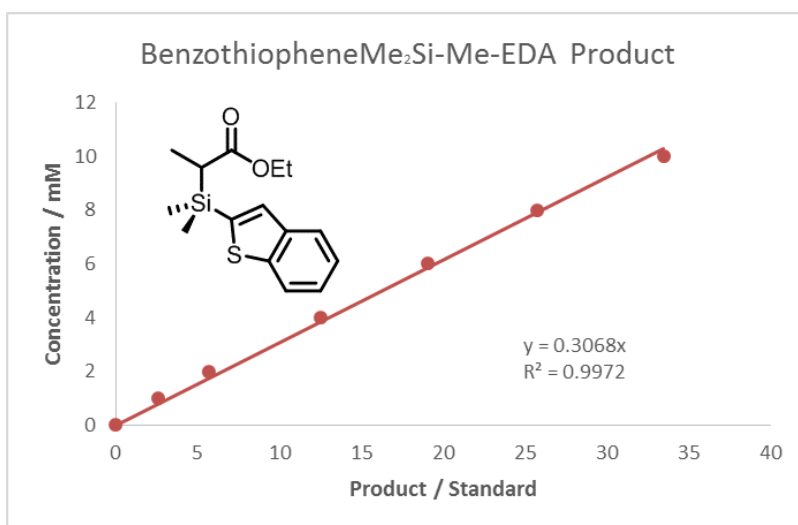

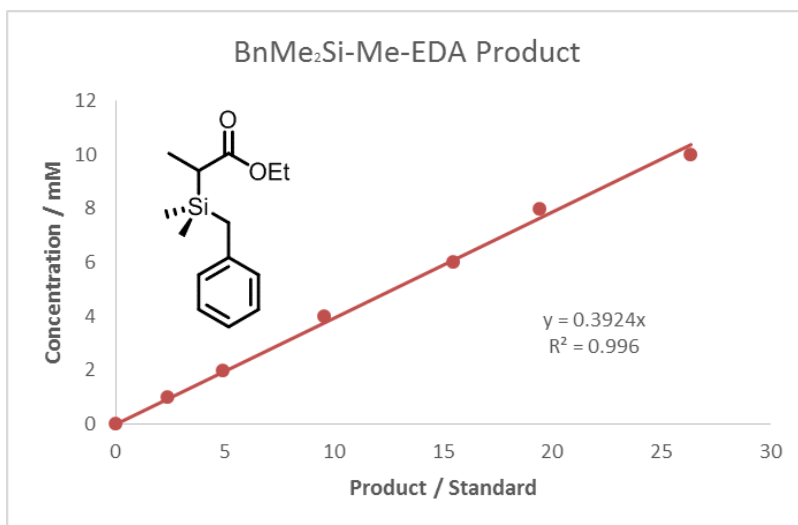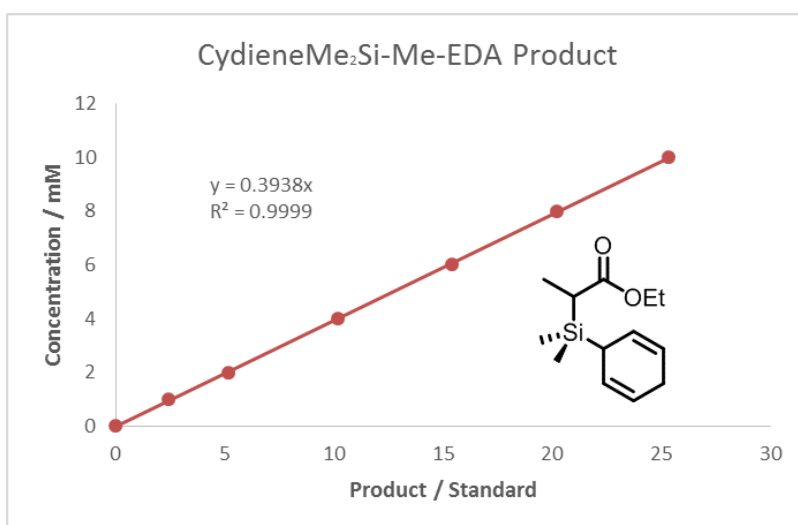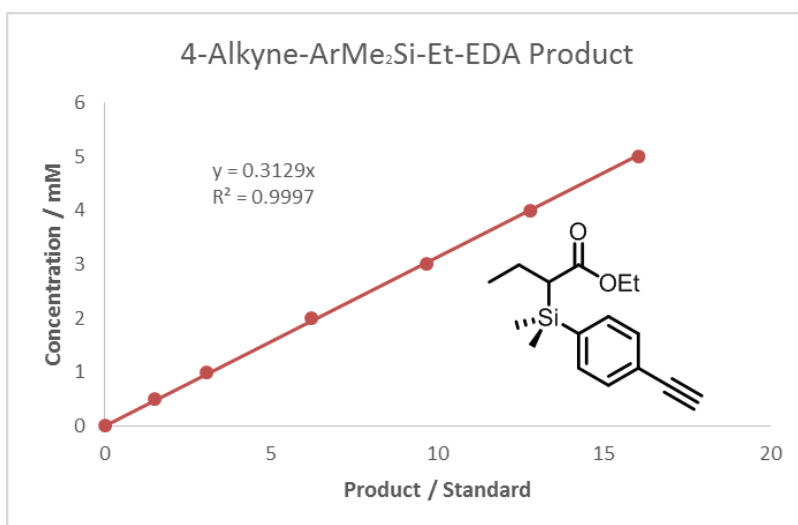

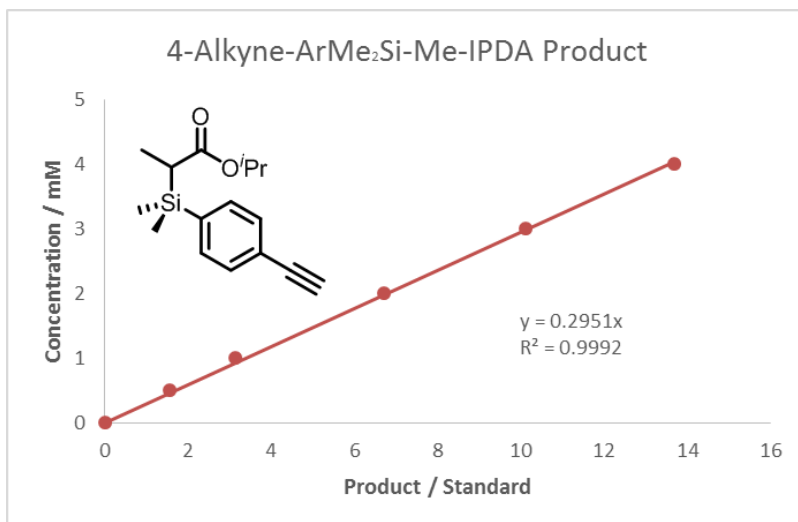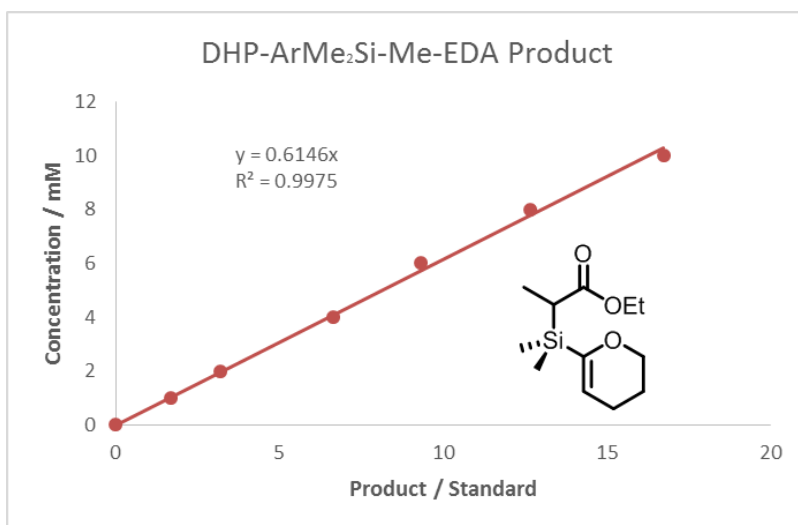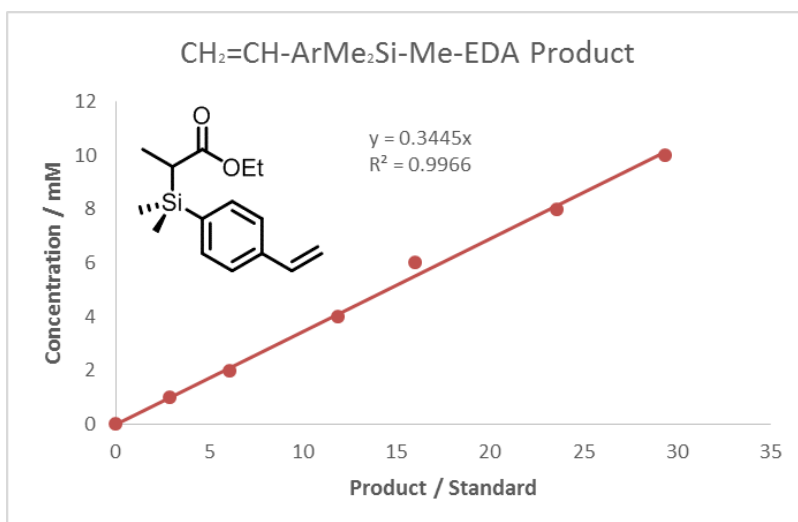



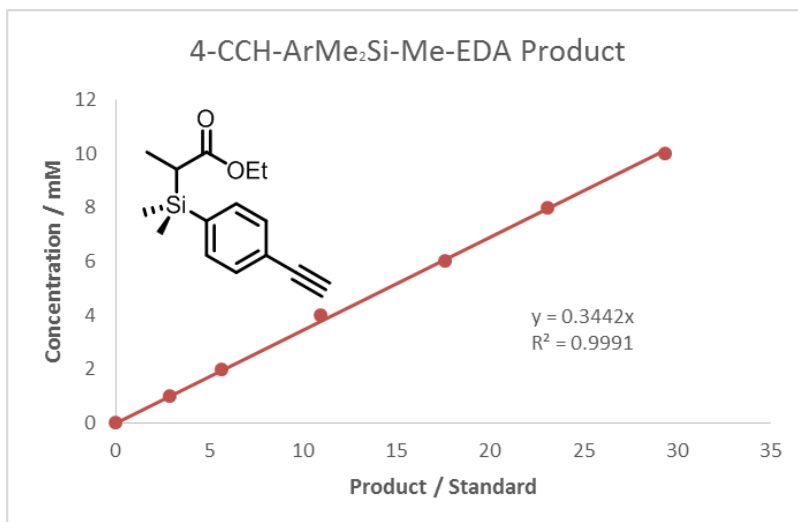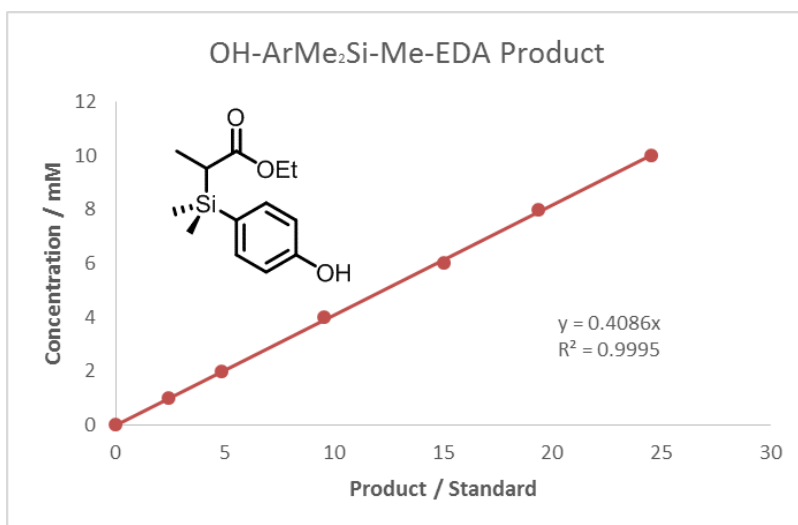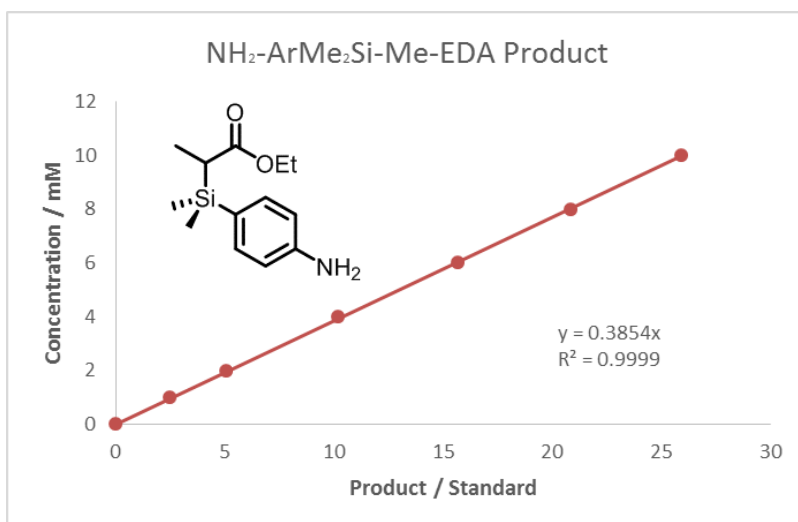

## VIII. Chiral SFC Traces for Racemic and Enzymatically Synthesized Organosilicon Products

All the *ee* values of enzymatically synthesized organosilicon products were determined using chiral SFC. The chiral SFC traces for racemic and enzymatic products are shown below.

The absolute configuration of enzymatically synthesized organosilicon product **3** was determined to be (*R*) by comparing the HPLC retention times of *rac*-**3** and **3** with that reported in the literature (12). The absolute configurations of other organosilicon products were inferred by analogy, assuming the facial selectivity of the diazo reagents remains the same in the biosyntheses of compound **3-22**.

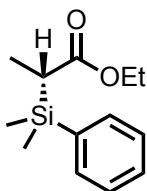

*rac* or *R*-**3**

Chiralpak IC, 3% *i*-PrOH in CO<sub>2</sub>, 3.5 mL/min, 210 nm

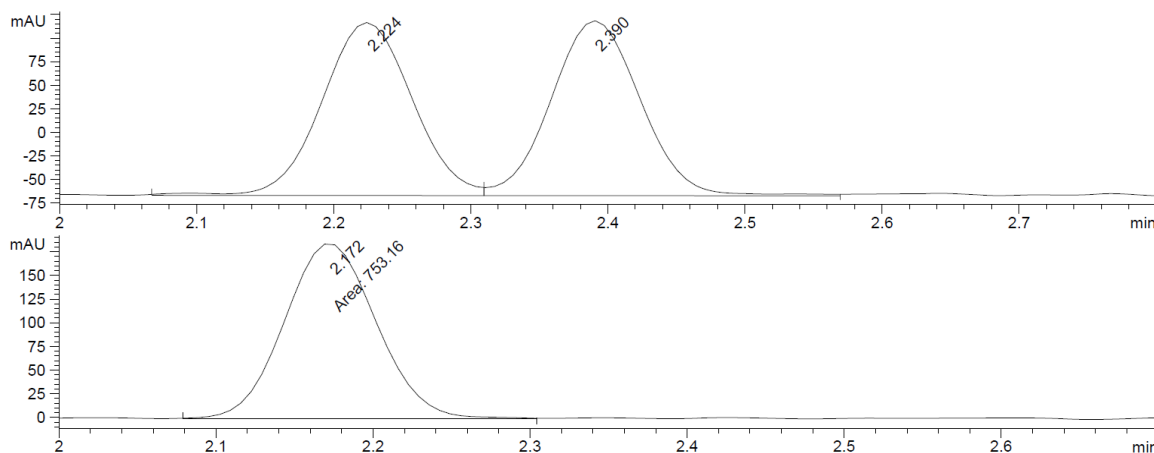

Area% report for *rac* and *R*-**3**:

| <i>rac</i> - <b>3</b> |              |        | <i>R</i> - <b>3</b>  |              |        |
|-----------------------|--------------|--------|----------------------|--------------|--------|
| Retention Time (min)  | Area (mAU*s) | Area % | Retention Time (min) | Area (mAU*s) | Area % |
| 2.224                 | 842.723      | 50.03  | 2.172                | 753.160      | 100.00 |
| 2.390                 | 841.657      | 49.97  | -                    | -            | -      |
| Total                 | 1684.380     | 100.00 | Total                | 753.160      | 100.00 |

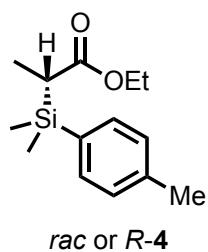

Chiralpak AD-H, 3% *i*-PrOH in CO<sub>2</sub>, 2.5 mL/min, 210 nm

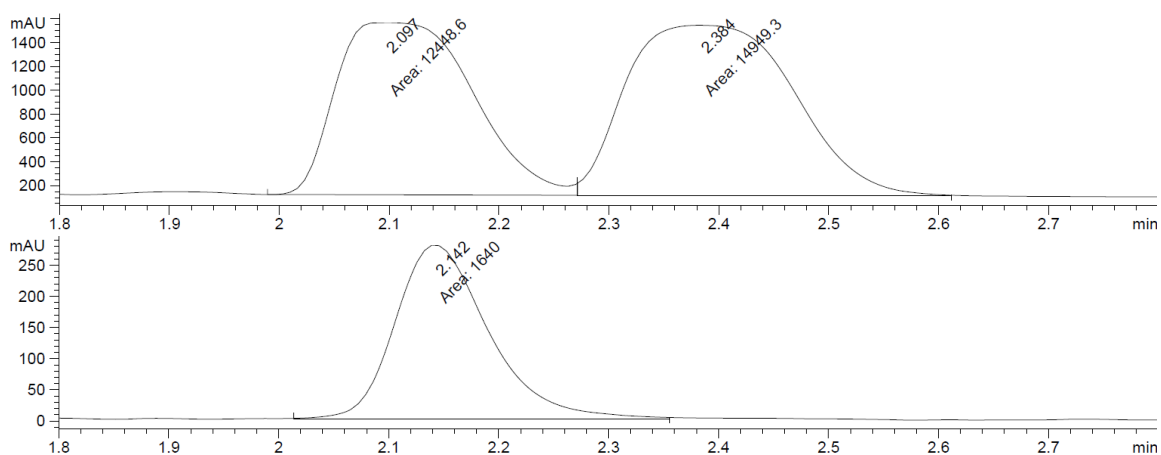

Area% report for *rac* and *R-4*:

| <i>rac-4</i>         |              |        | <i>R-4</i>           |              |        |
|----------------------|--------------|--------|----------------------|--------------|--------|
| Retention Time (min) | Area (mAU*s) | Area % | Retention Time (min) | Area (mAU*s) | Area % |
| 2.097                | 124486       | 45.44  | 2.142                | 16934.0      | 100.00 |
| 2.390                | 149493       | 54.56  | -                    | -            | -      |
| Total                | 273979       | 100.00 | Total                | 16934.0      | 100.00 |

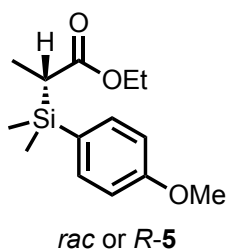

Chiralpak IC, 3% *i*-PrOH in CO<sub>2</sub>, 3.5 mL/min, 210 nm

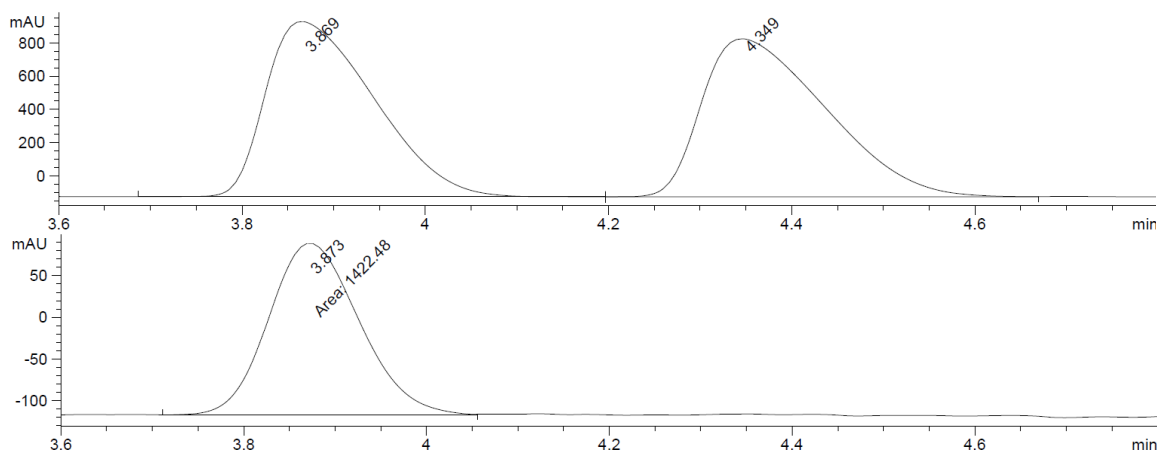

Area% report for *rac* and *R-5*:

| <i>rac-5</i>         |              |        | <i>R-5</i>           |              |        |
|----------------------|--------------|--------|----------------------|--------------|--------|
| Retention Time (min) | Area (mAU*s) | Area % | Retention Time (min) | Area (mAU*s) | Area % |
| 3.869                | 8651.07      | 49.14  | 3.873                | 1422.48      | 100.00 |
| 4.349                | 8955.03      | 50.86  | -                    | -            | -      |
| Total                | 17606.10     | 100.00 | Total                | 1422.48      | 100.00 |

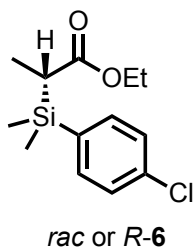

Chiralpak AD-H, 3% *i*-PrOH in CO<sub>2</sub>, 2.5 mL/min, 210 nm

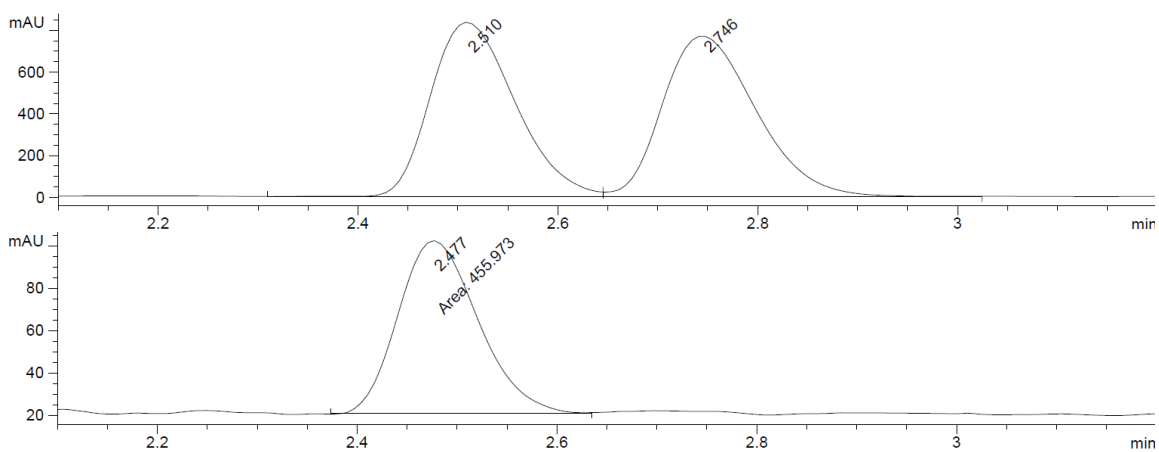

Area% report for *rac* and **R-6**:

| <b><i>rac-6</i></b>  |              |        | <b><i>R-6</i></b>    |              |        |
|----------------------|--------------|--------|----------------------|--------------|--------|
| Retention Time (min) | Area (mAU*s) | Area % | Retention Time (min) | Area (mAU*s) | Area % |
| 2.510                | 4898.62      | 49.48  | 2.477                | 455.973      | 100.00 |
| 2.746                | 5001.36      | 50.52  | -                    | -            | -      |
| Total                | 9899.98      | 100.00 | Total                | 455.973      | 100.00 |

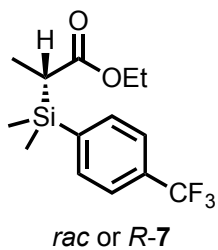

Chiralcel OD-H, 2% *i*-PrOH in CO<sub>2</sub>, 2.5 mL/min, 210 nm

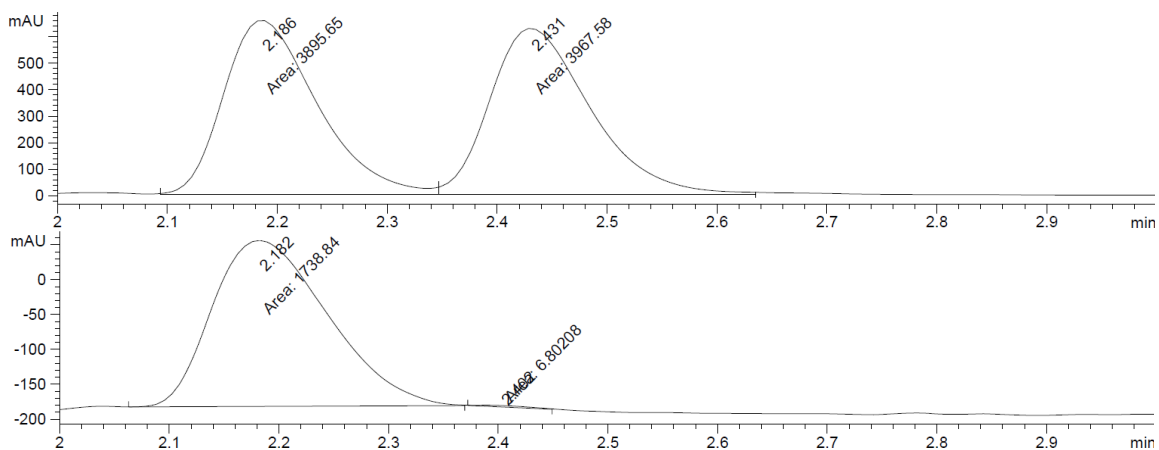

Area% report for *rac* and *R*-7:

| <i>rac</i> -7        |              |        | <i>R</i> -7          |              |        |
|----------------------|--------------|--------|----------------------|--------------|--------|
| Retention Time (min) | Area (mAU*s) | Area % | Retention Time (min) | Area (mAU*s) | Area % |
| 2.186                | 3895.65      | 49.54  | 2.182                | 1738.84      | 99.61  |
| 2.431                | 3967.58      | 50.46  | 2.402                | 6.80         | 0.39   |
| Total                | 7863.23      | 100.00 | Total                | 1745.65      | 100.00 |

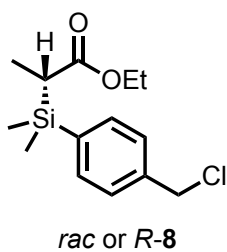

Chiralpak AD-H, 3% *i*-PrOH in CO<sub>2</sub>, 2.5 mL/min, 210 nm

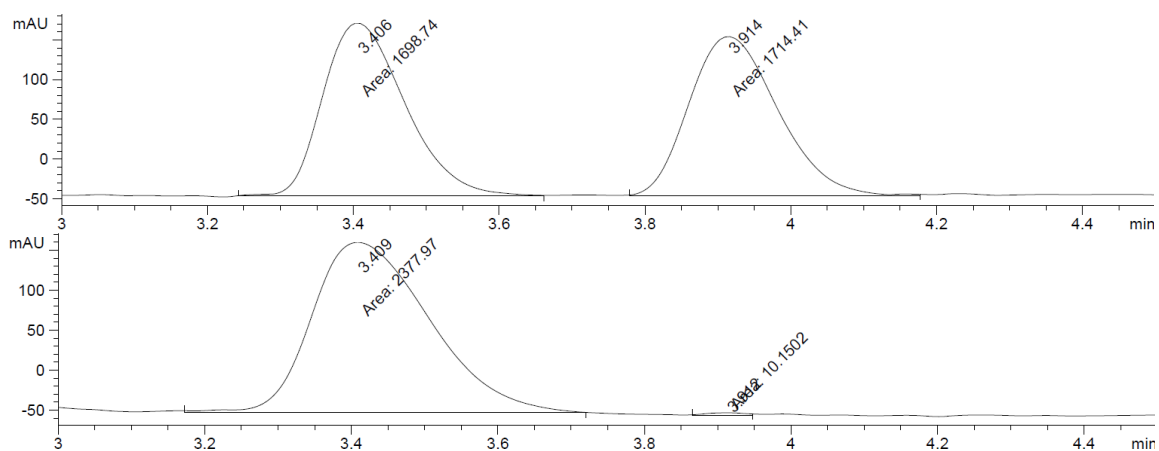

Area% report for *rac* and *R-8*:

| <i>rac-8</i>         |              |        | <i>R-8</i>           |              |        |
|----------------------|--------------|--------|----------------------|--------------|--------|
| Retention Time (min) | Area (mAU*s) | Area % | Retention Time (min) | Area (mAU*s) | Area % |
| 3.406                | 1698.74      | 49.77  | 3.409                | 2377.97      | 99.58  |
| 3.914                | 1714.41      | 50.23  | 3.912                | 10.15        | 0.42   |
| Total                | 3413.15      | 100.00 | Total                | 2388.12      | 100.00 |

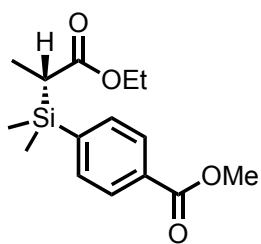

*rac* or *R-9*

Chiralcel OD-H, 5% *i*-PrOH in CO<sub>2</sub>, 2.5 mL/min, 210 nm

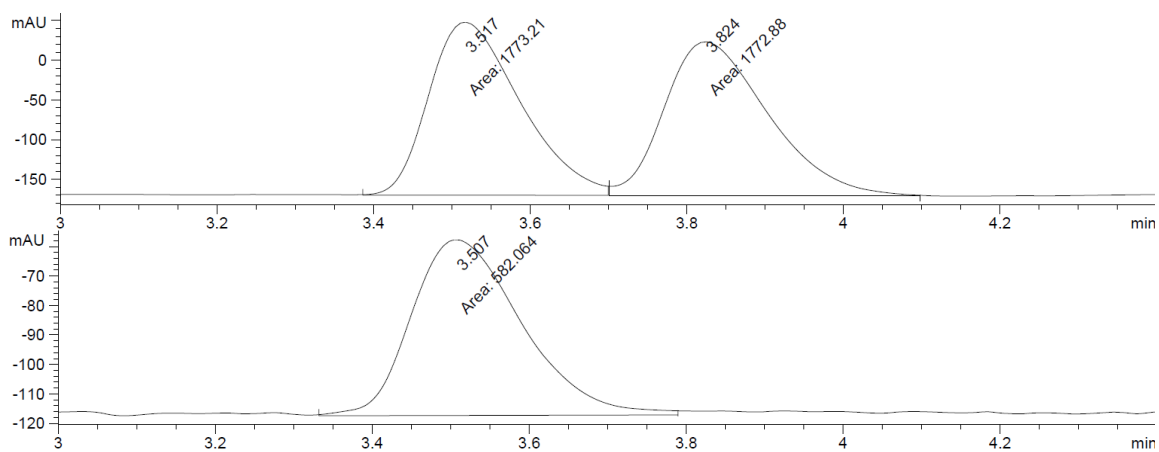

Area% report for *rac* and *R-9*:

| <i>rac-9</i>         |              |        | <i>R-9</i>           |              |        |
|----------------------|--------------|--------|----------------------|--------------|--------|
| Retention Time (min) | Area (mAU*s) | Area % | Retention Time (min) | Area (mAU*s) | Area % |
| 3.517                | 1773.21      | 50.00  | 3.507                | 582.064      | 100.00 |
| 3.824                | 1772.88      | 50.00  | -                    | -            | -      |
| Total                | 3546.09      | 100.00 | Total                | 582.064      | 100.00 |



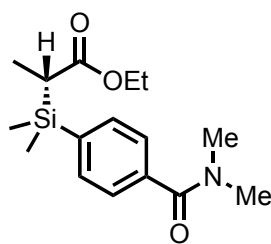

*rac* or **R-10**

Chiralpak IC, 30% *i*-PrOH in CO<sub>2</sub>, 2.5 mL/min, 210 nm

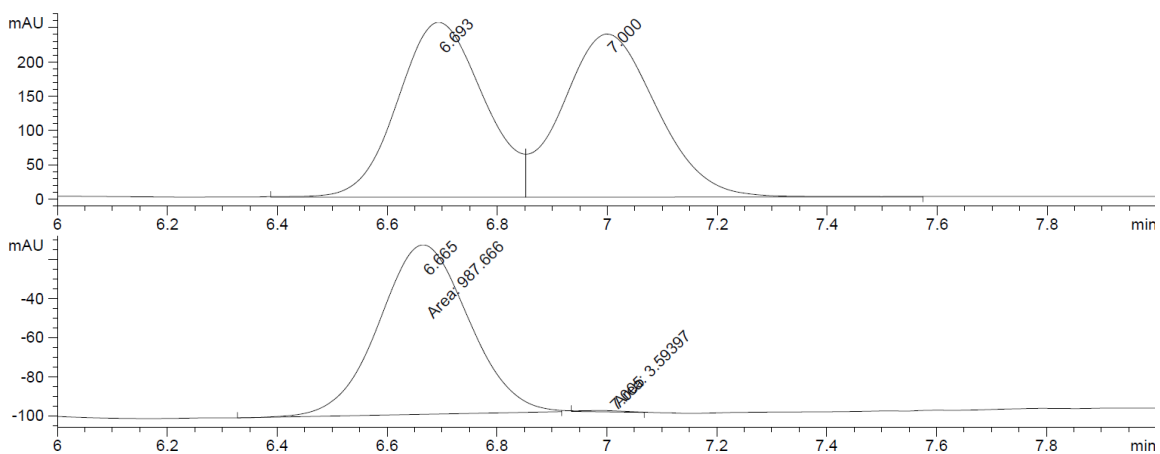

Area% report for *rac* and **R-10**:

| <b><i>rac</i>-10</b> |              |        | <b><i>R</i>-10</b>   |              |        |
|----------------------|--------------|--------|----------------------|--------------|--------|
| Retention Time (min) | Area (mAU*s) | Area % | Retention Time (min) | Area (mAU*s) | Area % |
| 6.693                | 2779.93      | 49.38  | 6.665                | 987.666      | 99.63  |
| 7.000                | 2849.58      | 50.62  | 7.005                | 3.594        | 0.36   |
| Total                | 5629.50      | 100.00 | Total                | 991.260      | 100.00 |

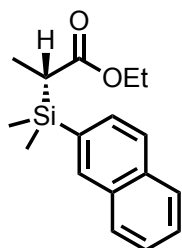

*rac* or *R-11*

Chiralpak IC, 7% *i*-PrOH in CO<sub>2</sub>, 3.5 mL/min, 210 nm

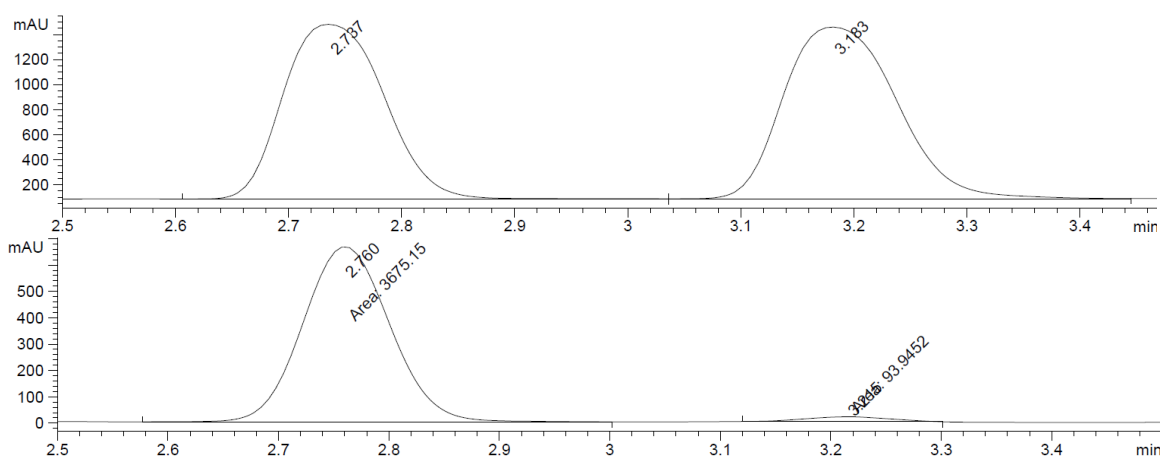

Area% report for *rac* and *R-11*:

| <i>rac-11</i>        |              |        | <i>R-11</i>          |              |        |
|----------------------|--------------|--------|----------------------|--------------|--------|
| Retention Time (min) | Area (mAU*s) | Area % | Retention Time (min) | Area (mAU*s) | Area % |
| 2.735                | 8677.04      | 47.45  | 2.760                | 3675.15      | 97.51  |
| 3.183                | 9609.04      | 52.55  | 3.215                | 93.95        | 2.49   |
| Total                | 18286.1      | 100.00 | Total                | 3769.10      | 100.00 |

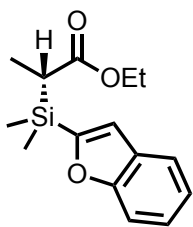

*rac* or *R*-12

Chiralpak IC, 3% *i*-PrOH in CO<sub>2</sub>, 3.5 mL/min, 210 nm

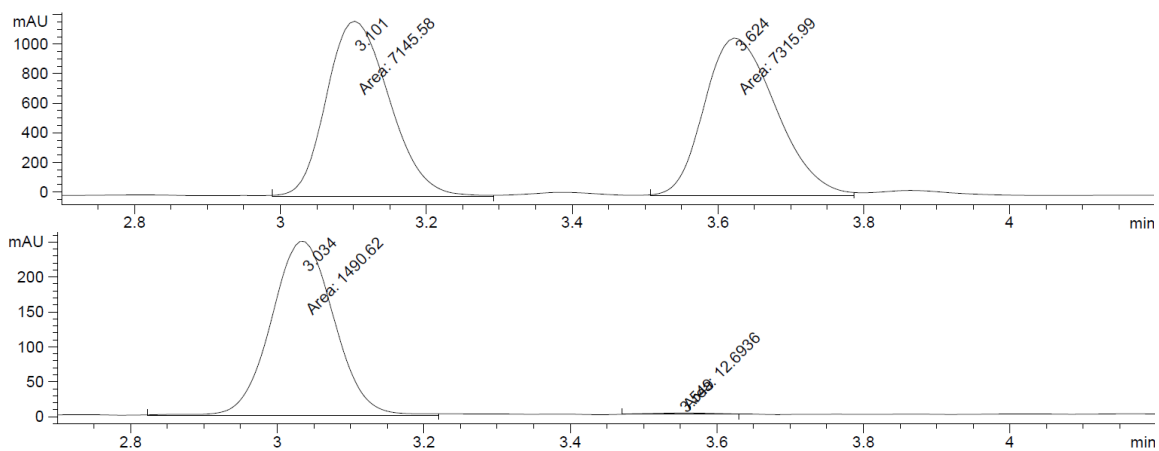

Area% report for *rac* and *R*-12:

| <i>rac</i> -12       |              |        | <i>R</i> -12         |              |        |
|----------------------|--------------|--------|----------------------|--------------|--------|
| Retention Time (min) | Area (mAU*s) | Area % | Retention Time (min) | Area (mAU*s) | Area % |
| 3.101                | 7145.58      | 49.41  | 3.034                | 1490.62      | 99.16  |
| 3.624                | 7315.99      | 50.59  | 3.549                | 12.69        | 0.84   |
| Total                | 14461.6      | 100.00 | Total                | 1503.31      | 100.00 |

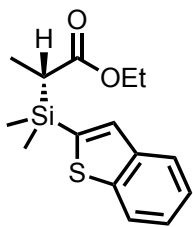

*rac* or *R-13*

Chiralpak IC, 7% *i*-PrOH in CO<sub>2</sub>, 3.5 mL/min, 210 nm

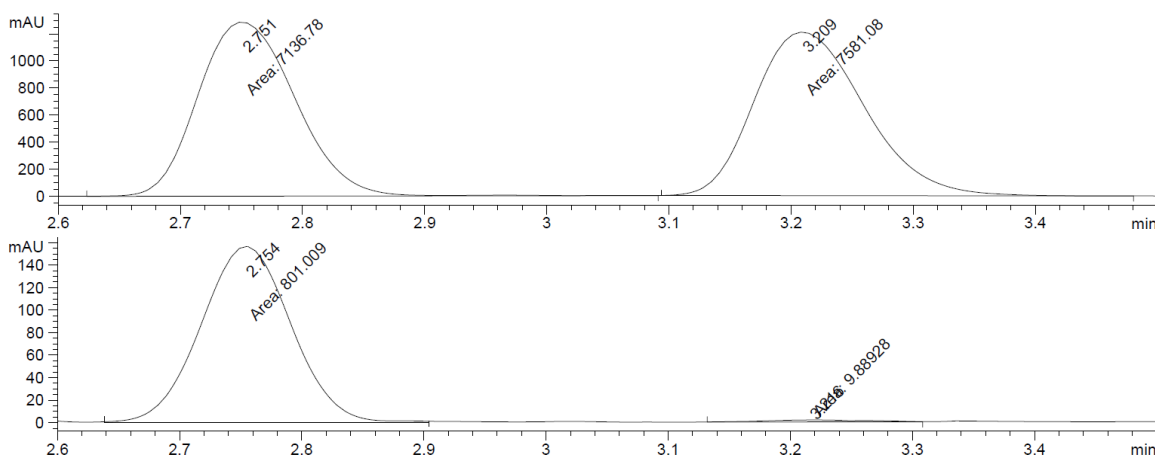

Area% report for *rac* and *R-13*:

| <i>rac-13</i>        |              |        | <i>R-13</i>          |              |        |
|----------------------|--------------|--------|----------------------|--------------|--------|
| Retention Time (min) | Area (mAU*s) | Area % | Retention Time (min) | Area (mAU*s) | Area % |
| 2.751                | 7136.78      | 48.49  | 2.764                | 801.009      | 98.78  |
| 3.209                | 7581.08      | 51.51  | 3.219                | 9.889        | 1.22   |
| Total                | 14717.9      | 100.00 | Total                | 810.898      | 100.00 |

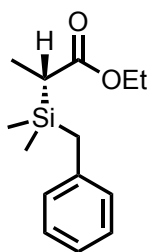

*rac* or *R-14*

Chiralpak AD-H, 3% *i*-PrOH in CO<sub>2</sub>, 2.5 mL/min, 210 nm

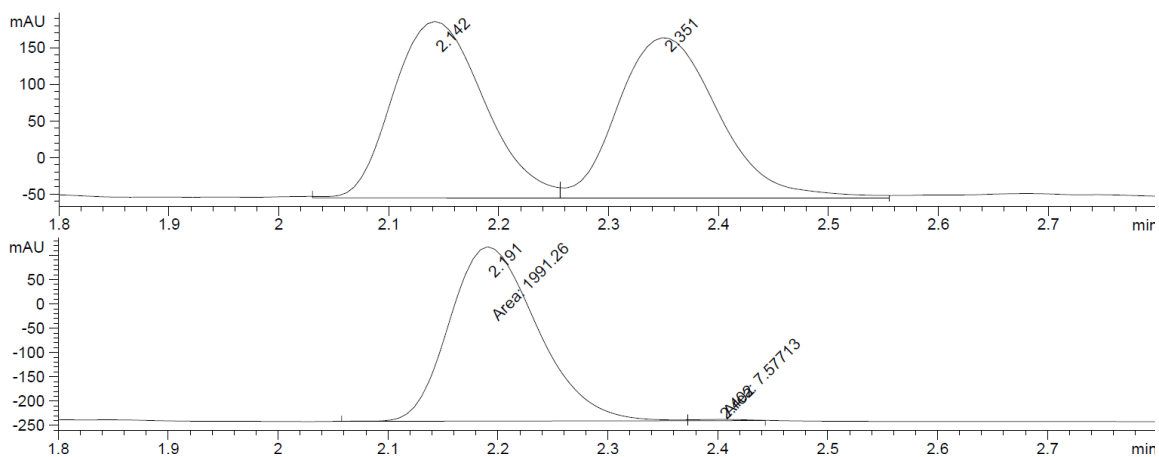

Area% report for *rac* and *R-14*:

| <i>rac-14</i>        |              |        | <i>R-14</i>          |              |        |
|----------------------|--------------|--------|----------------------|--------------|--------|
| Retention Time (min) | Area (mAU*s) | Area % | Retention Time (min) | Area (mAU*s) | Area % |
| 2.142                | 1384.73      | 49.85  | 2.191                | 1991.26      | 99.62  |
| 2.351                | 1393.07      | 50.15  | 2.402                | 7.58         | 0.38   |
| Total                | 2777.80      | 100.00 | Total                | 1998.84      | 100.00 |

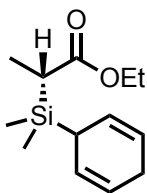

*rac* or *R-15*

Chiralpak IC, 3% *i*-PrOH in CO<sub>2</sub>, 3.5 mL/min, 210 nm

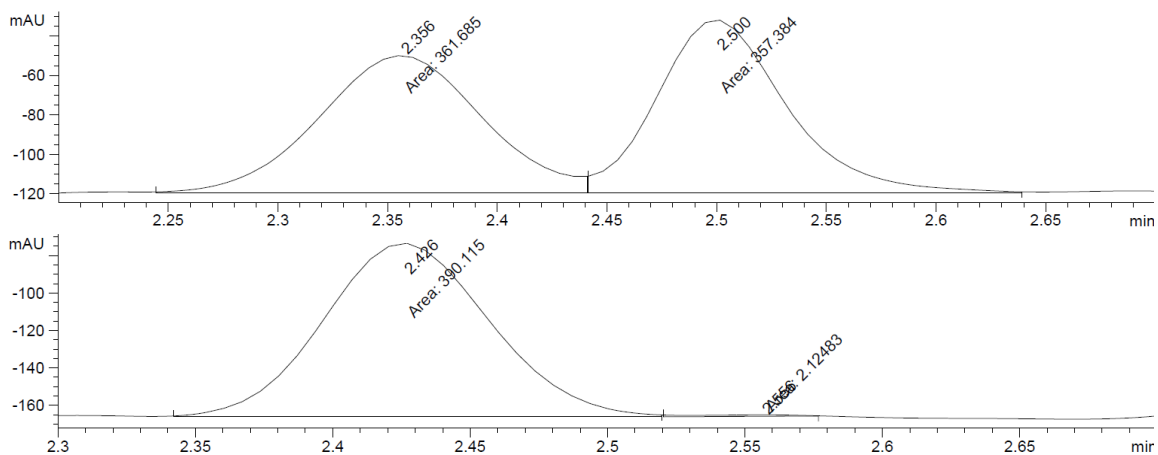

Area% report for *rac* and *R-15*:

| <i>rac-15</i>        |              |        | <i>R-15</i>          |              |        |
|----------------------|--------------|--------|----------------------|--------------|--------|
| Retention Time (min) | Area (mAU*s) | Area % | Retention Time (min) | Area (mAU*s) | Area % |
| 2.356                | 361.685      | 50.30  | 2.426                | 390.115      | 99.45  |
| 2.500                | 357.384      | 49.70  | 2.556                | 2.125        | 0.54   |
| Total                | 719.070      | 100.00 | Total                | 392.240      | 100.00 |

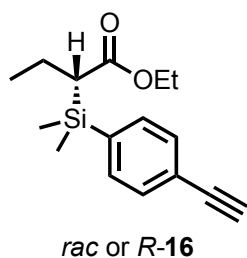

Chiralpak AD-H, 3% *i*-PrOH in CO<sub>2</sub>, 2.5 mL/min, 210 nm

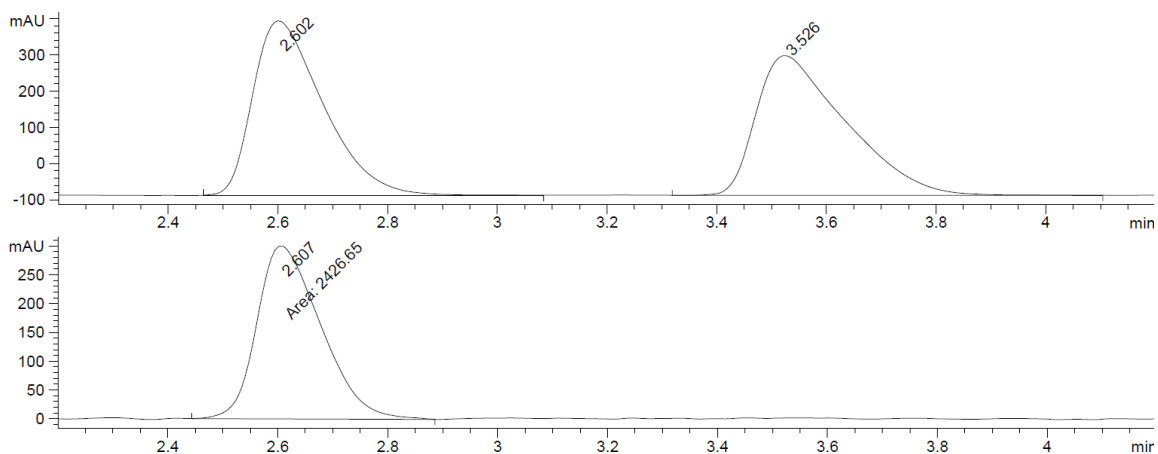

Area% report for *rac* and **R-16**:

| <b><i>rac</i>-16</b> |              |        | <b><i>R</i>-16</b>   |              |        |
|----------------------|--------------|--------|----------------------|--------------|--------|
| Retention Time (min) | Area (mAU*s) | Area % | Retention Time (min) | Area (mAU*s) | Area % |
| 2.602                | 4276.04      | 49.44  | 2.607                | 2426.65      | 100.00 |
| 3.526                | 4373.23      | 50.56  |                      |              |        |
| Total                | 8649.28      | 100.00 | Total                | 2426.65      | 100.00 |

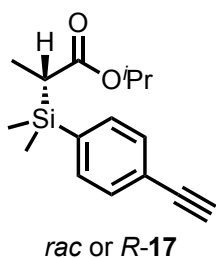

Chiralpak IC, 3% *i*-PrOH in CO<sub>2</sub>, 2.5 mL/min, 210 nm

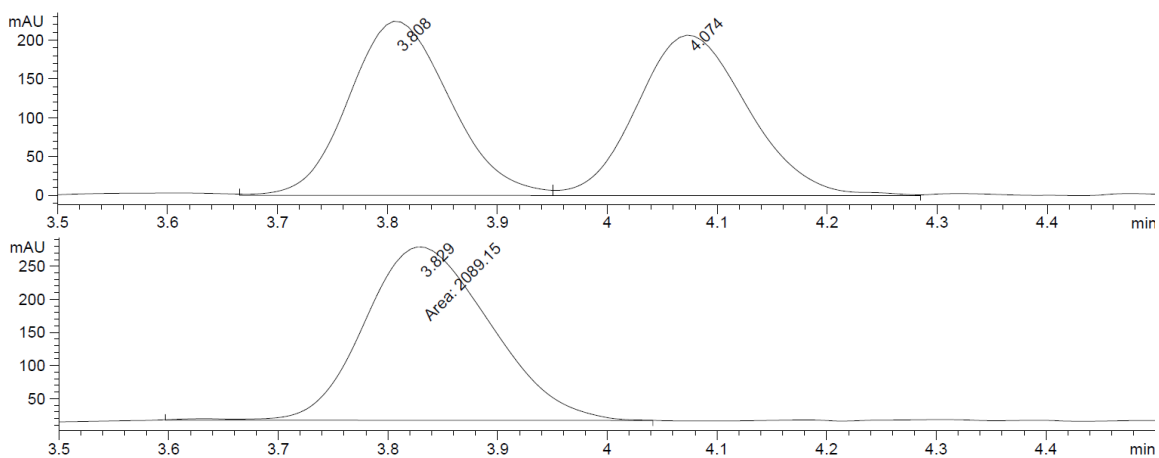

Area% report for *rac* and *R*-17:

| <i>rac</i> -17       |              |        | <i>R</i> -17         |              |        |
|----------------------|--------------|--------|----------------------|--------------|--------|
| Retention Time (min) | Area (mAU*s) | Area % | Retention Time (min) | Area (mAU*s) | Area % |
| 3.808                | 1442.74      | 49.78  | 3.829                | 2089.15      | 100.00 |
| 4.074                | 1455.49      | 50.22  |                      |              |        |
| Total                | 2898.23      | 100.00 | Total                | 2089.15      | 100.00 |



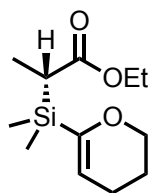

*rac* or **R-18**

Chiralpak IC, 3% *i*-PrOH in CO<sub>2</sub>, 3.5 mL/min, 210 nm

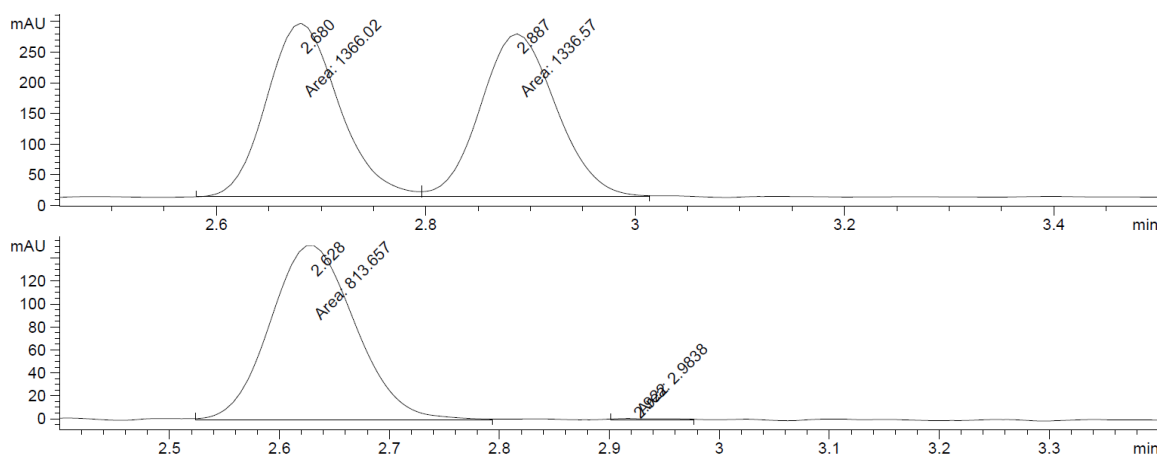

Area% report for *rac* and **R-18**:

| <b><i>rac</i>-18</b> |              |        | <b><i>R</i>-18</b>   |              |        |
|----------------------|--------------|--------|----------------------|--------------|--------|
| Retention Time (min) | Area (mAU*s) | Area % | Retention Time (min) | Area (mAU*s) | Area % |
| 2.680                | 1366.02      | 50.54  | 2.628                | 813.657      | 99.63  |
| 2.887                | 1336.57      | 49.46  | 2.922                | 2.984        | 0.37   |
| Total                | 2702.59      | 100.00 | Total                | 816.641      | 100.00 |

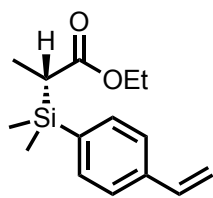

*rac* or *R*-19

Chiralpak IC, 3% *i*-PrOH in CO<sub>2</sub>, 3.5 mL/min, 210 nm

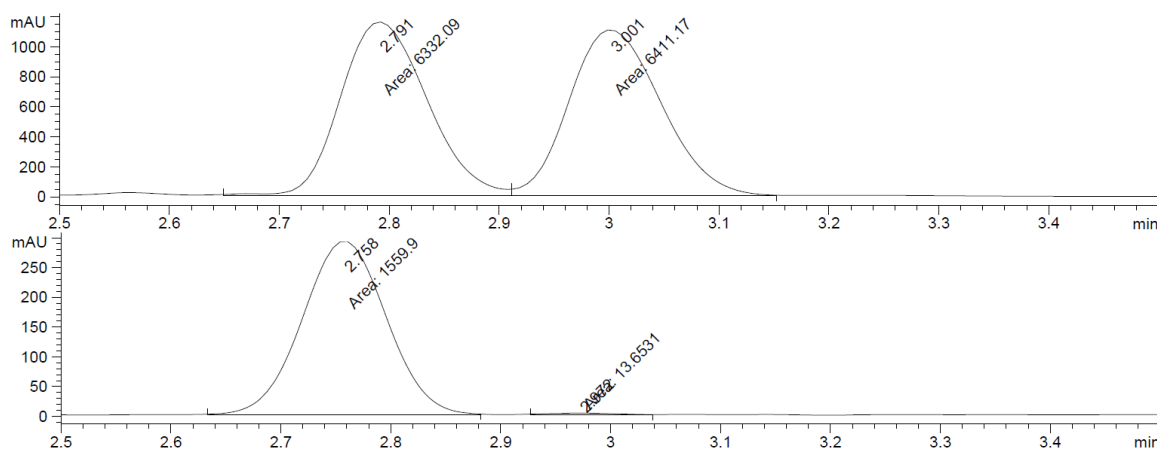

Area% report for *rac* and *R*-19:

| <i>rac</i> -19       |              |        | <i>R</i> -19         |              |        |
|----------------------|--------------|--------|----------------------|--------------|--------|
| Retention Time (min) | Area (mAU*s) | Area % | Retention Time (min) | Area (mAU*s) | Area % |
| 2.791                | 6332.09      | 49.69  | 2.758                | 1559.90      | 99.13  |
| 3.001                | 6411.17      | 50.31  | 2.972                | 13.65        | 0.87   |
| Total                | 12743.3      | 100.00 | Total                | 1573.56      | 100.00 |

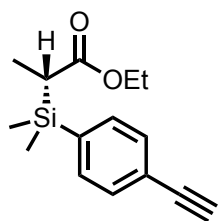

*rac* or *R-20*

Chiralcel OD-H, 3% *i*-PrOH in CO<sub>2</sub>, 2.5 mL/min, 210 nm

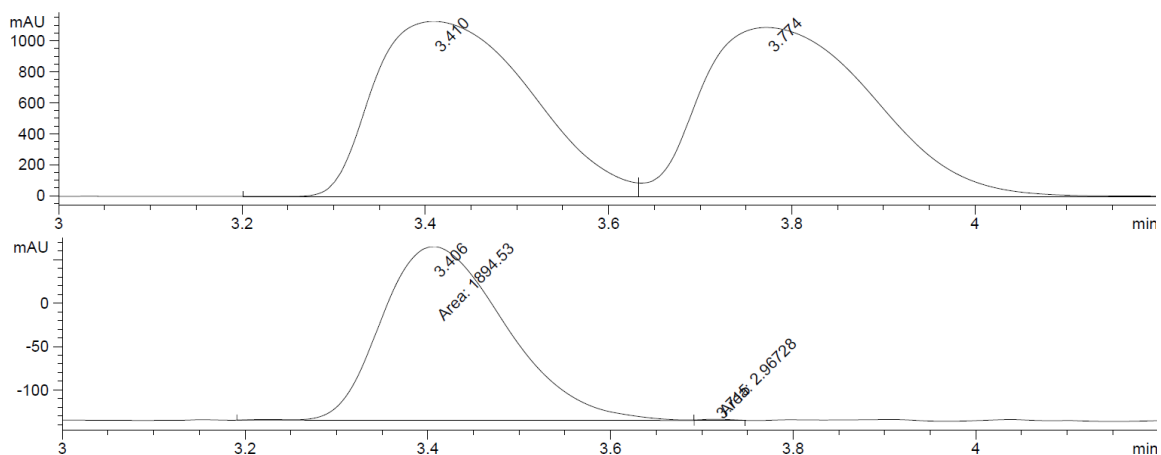

Area% report for *rac* and *R-20*:

| <i>rac-20</i>        |              |        | <i>R-20</i>          |              |        |
|----------------------|--------------|--------|----------------------|--------------|--------|
| Retention Time (min) | Area (mAU*s) | Area % | Retention Time (min) | Area (mAU*s) | Area % |
| 3.410                | 13436.2      | 48.40  | 3.406                | 1894.53      | 99.84  |
| 3.774                | 14326.4      | 51.60  | 3.715                | 2.97         | 0.16   |
| Total                | 27762.6      | 100.00 | Total                | 1897.50      | 100.00 |

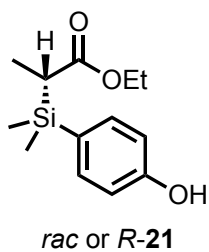

Chiralpak IC, 10% *i*-PrOH in CO<sub>2</sub>, 2.5 mL/min, 210 nm

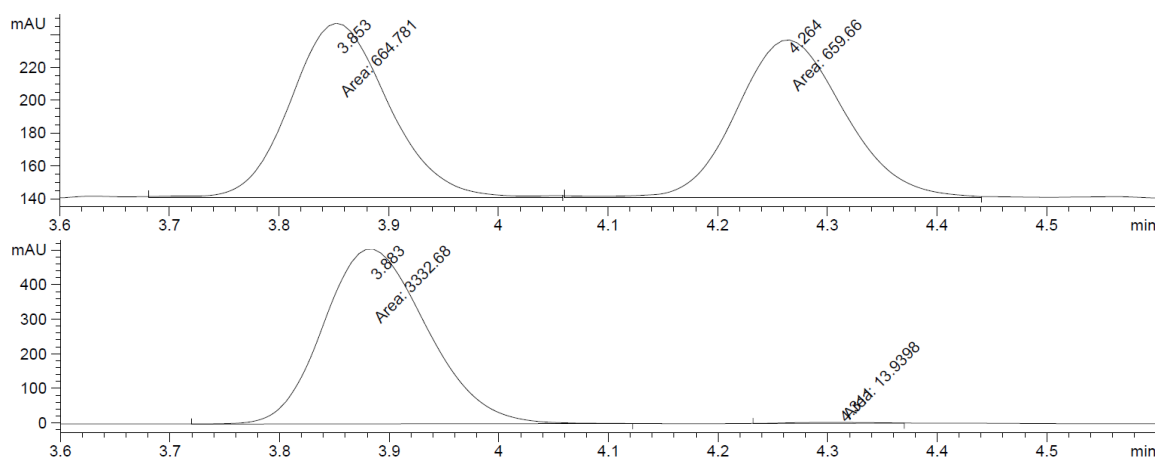

Area% report for *R-21*:

| <i>rac-21</i>        |              |        | <i>R-21</i>          |              |        |
|----------------------|--------------|--------|----------------------|--------------|--------|
| Retention Time (min) | Area (mAU*s) | Area % | Retention Time (min) | Area (mAU*s) | Area % |
| 3.853                | 664.781      | 50.19  | 3.883                | 3332.68      | 99.58  |
| 4.264                | 659.660      | 49.81  | 4.331                | 13.94        | 0.42   |
| Total                | 1324.441     | 100.00 | Total                | 3346.62      | 100.00 |

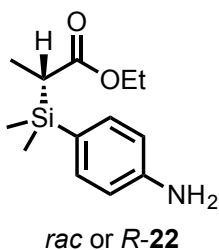

Chiralpak AD-H, 10% *i*-PrOH in CO<sub>2</sub>, 2.5 mL/min, 210 nm

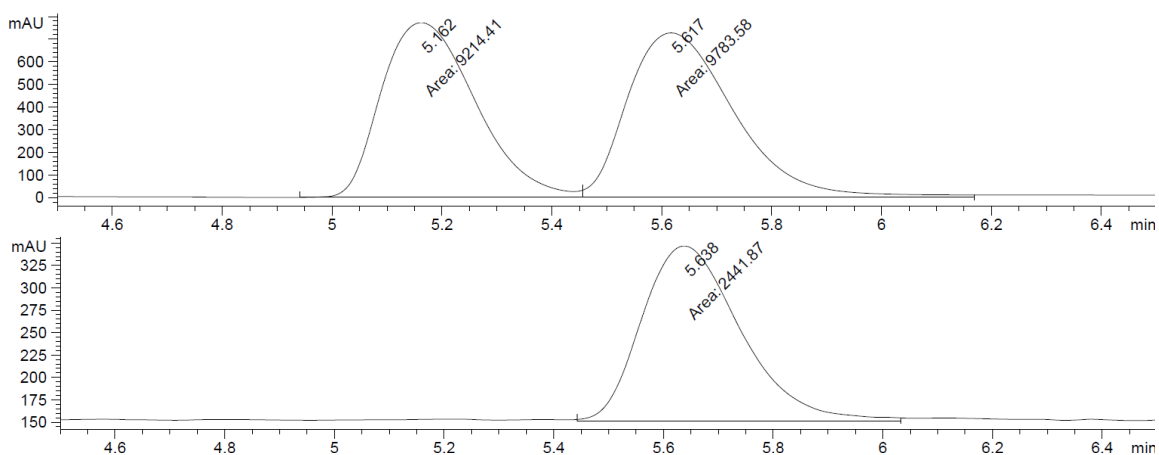

Area% report for *rac* and *R*-22:

| <i>rac</i> -22       |              |        | <i>R</i> -22         |              |        |
|----------------------|--------------|--------|----------------------|--------------|--------|
| Retention Time (min) | Area (mAU*s) | Area % | Retention Time (min) | Area (mAU*s) | Area % |
| 5.162                | 9214.41      | 48.50  | -                    | -            | -      |
| 5.617                | 9783.58      | 51.50  | 5.638                | 195.47       | 100.00 |
| Total                | 18998.0      | 100.00 | Total                | 195.47       | 100.00 |

Preparative-scale reaction (0.1 mmol):

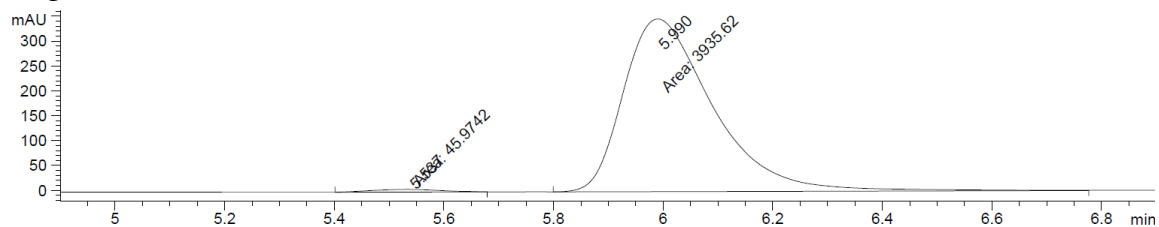

Area% report for *R*-22:

| <i>R</i> -22 (OD 15-whole cell) |              |        |
|---------------------------------|--------------|--------|
| Retention Time (min)            | Area (mAU*s) | Area % |
| 5.537                           | 45.97        | 1.15   |
| 5.990                           | 3935.62      | 98.85  |
| Total                           | 3981.59      | 100.00 |

## IX. References

1. M. B. Frampton, P. M. Zelisko, Organosilicon biotechnology. *Silicon* **1**, 147–163 (2009).
2. Z. Rappoport, Y. Apeloig, Eds., *The Chemistry of Organic Silicon Compounds* (Wiley, 2003), vol. 3.
3. S. A. Ponomarenko, S. Kirchmeyer, Conjugated organosilicon materials for organic electronics and photonics. *Adv. Polym. Sci.* **235**, 33–110 (2011).
4. G. A. Showell, J. S. Mills, Chemistry challenges in lead optimization: Silicon isosteres in drug discovery. *Drug Discov. Today* **8**, 551–556 (2003).
5. A. K. Franz, S. O. Wilson, Organosilicon molecules with medicinal applications. *J. Med. Chem.* **56**, 388–405 (2013).
6. P. T. Anastas, J. Warner, *Green Chemistry: Theory and Practice* (Oxford Univ. Press, New York, 1998).
7. A. M. Tondreau, C. C. H. Atienza, K. J. Weller, S. A. Nye, K. M. Lewis, J. G. P. Delis, P. J. Chirik, Iron catalysts for selective anti-Markovnikov alkene hydrosilylation using tertiary silanes. *Science* **335**, 567–570 (2012).
8. A. A. Toutov, W.-B. Liu, K. N. Betz, A. Fedorov, B. M. Stoltz, R. H. Grubbs, Silylation of C-H bonds in aromatic heterocycles by an Earth-abundant metal catalyst. *Nature* **518**, 80–84 (2015).
9. B. Marciniec, Ed., *Hydrosilylation: A Comprehensive Review on Recent Advances* (Springer, Netherlands, 2009).
10. T. Lee, J. F. Hartwig, Rhodium-catalyzed enantioselective silylation of cyclopropyl C-H bonds. *Angew. Chem. Int. Ed.* **55**, 8723–8727 (2016) and references therein.
11. R. Sambasivan, Z. T. Ball, Metallopeptides for asymmetric dirhodium catalysis. *J. Am. Chem. Soc.* **132**, 9289–9291 (2010).
12. D. Chen, D.-X. Zhu, M.-H. Xu, Rhodium(I)-catalyzed highly enantioselective insertion of carbenoid into Si-H: Efficient access to functional chiral silanes. *J. Am. Chem. Soc.* **138**, 1498–1501 (2016).
13. Y. Yasutomi, H. Suematsu, T. Katsuki, Iridium(III)-catalyzed enantioselective Si-H bond insertion and formation of an enantioenriched silicon center. *J. Am. Chem. Soc.* **132**, 4510–4511 (2010).
14. Y.-Z. Zhang, S.-F. Zhu, L.-X. Wang, Q.-L. Zhou, Copper-catalyzed highly enantioselective carbenoid insertion into Si-H bonds. *Angew. Chem. Int. Ed.* **47**, 8496–8498 (2008).
15. S. Hyde, J. Veliks, B. Liégault, D. Grassi, M. Taillefer, V. Gouverneur, Copper-catalyzed insertion into heteroatom-hydrogen bonds with trifluorodiazalkanes. *Angew. Chem. Int. Ed.* **55**, 3785–3789 (2016).
16. See supplementary materials for details.
17. U. T. Bornscheuer, G. W. Huisman, R. J. Kazlauskas, S. Lutz, J. C. Moore, K. Robins, Engineering the third wave of biocatalysis. *Nature* **485**, 185–194 (2012).

18. J. L. Tucker, M. M. Faul, Industrial research: Drug companies must adopt green chemistry. *Nature* **534**, 27–29 (2016).
19. P. J. O'Brien, D. Herschlag, Catalytic promiscuity and the evolution of new enzymatic activities. *Chem. Biol.* **6**, R91–R105 (1999).
20. S. D. Copley, Enzymes with extra talents: Moonlighting functions and catalytic promiscuity. *Curr. Opin. Chem. Biol.* **7**, 265–272 (2003).
21. O. Khersonsky, D. S. Tawfik, Enzyme promiscuity: A mechanistic and evolutionary perspective. *Annu. Rev. Biochem.* **79**, 471–505 (2010).
22. P. S. Coelho, E. M. Brustad, A. Kannan, F. H. Arnold, Olefin cyclopropanation via carbene transfer catalyzed by engineered cytochrome P450 enzymes. *Science* **339**, 307–310 (2013).
23. Z. J. Wang, N. E. Peck, H. Renata, F. H. Arnold, Cytochrome P450-catalyzed insertion of carbenoids into N–H bonds. *Chem. Sci.* **5**, 598–601 (2014).
24. V. Tyagi, R. B. Bonn, R. Fasan, Intermolecular carbene S–H insertion catalysed by engineered myoglobin-based catalysts. *Chem. Sci.* **6**, 2488–2494 (2015).
25. Only stoichiometric iron carbenoid insertion into Si–H bonds has been reported (30).
26. M. Stelter, A. M. P. Melo, M. M. Pereira, C. M. Gomes, G. O. Hreggvidsson, S. Hjorleifsdottir, L. M. Saraiva, M. Teixeira, M. Archer, A novel type of monoheme cytochrome c: Biochemical and structural characterization at 1.23 Å resolution of *Rhodothermus marinus* cytochrome c. *Biochemistry* **47**, 11953–11963 (2008).
27. J. G. Kleingardner, K. L. Bren, Biological significance and applications of heme c proteins and peptides. *Acc. Chem. Res.* **48**, 1845–1852 (2015).
28. B. D. Levin, K. A. Walsh, K. K. Sullivan, K. L. Bren, S. J. Elliott, Methionine ligand lability of homologous monoheme cytochromes c. *Inorg. Chem.* **54**, 38–46 (2015).
29. S. Zaidi, M. I. Hassan, A. Islam, F. Ahmad, The role of key residues in structure, function, and stability of cytochrome-c. *Cell. Mol. Life Sci.* **71**, 229–255 (2014).
30. E. Scharrer, M. Brookhart, Insertion reactions of electrophilic iron carbene complexes with organosilanes: A synthetic and mechanistic study. *J. Organomet. Chem.* **497**, 61–71 (1995).
31. D. G. Gibson, L. Young, R. Y. Chuang, J. C. Venter, C. A. Hutchison 3rd, H. O. Smith, Enzymatic assembly of DNA molecules up to several hundred kilobases. *Nat. Methods* **6**, 343–345 (2009).
32. E. Arslan, H. Schulz, R. Zufferey, P. Künzler, L. Thöny-Meyer, Overproduction of the *Bradyrhizobium japonicum* c-type cytochrome subunits of the *cbb3* oxidase in *Escherichia coli*. *Biochem. Biophys. Res. Commun.* **251**, 744–747 (1998).
33. J. Sambrook, E. Fritsch, T. Maniatis, *Molecular Cloning: A Laboratory Manual* (Cold Spring Harbor Laboratory Press, New York, 1989).
34. E. A. Berry, B. L. Trumpower, Simultaneous determination of hemes a, b, and c from pyridine hemochrome spectra. *Anal. Biochem.* **161**, 1–15 (1987).
35. S. Kille, C. G. Acevedo-Rocha, L. P. Parra, Z. G. Zhang, D. J. Opperman, M. T. Reetz, J. P. Acevedo, Reducing codon redundancy and screening effort of combinatorial protein libraries created by saturation mutagenesis. *ACS Synth. Biol.* **2**, 83–92 (2013).

36. J. Wu, J. S. Panek, Total synthesis of (-)-virginiamycin M<sub>2</sub>: Application of crotylsilanes accessed by enantioselective Rh(II) or Cu(I) promoted carbenoid Si-H insertion. *J. Org. Chem.* **76**, 9900–9918 (2011).
37. L. A. Dakin, P. C. Ong, J. S. Panek, R. J. Staples, P. Stavropoulos, Speciation and mechanistic studies of chiral copper(I) Schiff base precursors mediating asymmetric carbenoid insertion reactions of diazoacetates into the Si–H bond of silanes. *Organometallics* **19**, 2896–2908 (2000).
38. L. A. Dakin, S. E. Schaus, E. N. Jacobsen, J. S. Panek, Carbenoid insertions into the silicon–hydrogen bond catalyzed by chiral copper(I) Schiff base complexes. *Tetrahedron Lett.* **39**, 8947–8950 (1998).
39. J.-C. Wang, Z. J. Xu, Z. Guo, Q. H. Deng, C. Y. Zhou, X. L. Wan, C. M. Che, Highly enantioselective intermolecular carbene insertion to C-H and Si-H bonds catalyzed by a chiral iridium(III) complex of a D<sub>4</sub>-symmetric Halterman porphyrin ligand. *Chem. Commun. (Camb.)* **48**, 4299–4301 (2012).
40. R. Hrdina, L. Guénée, D. Moraleda, J. Lacour, Synthesis, structural analysis, and catalytic properties of tetrakis(binaphthyl or octahydrobinaphthyl phosphate) dirhodium(II,II) complexes. *Organometallics* **32**, 473–479 (2013).
41. M. Ge, E. J. Corey, A method for the catalytic enantioselective synthesis of 6-silylated 2-cyclohexenones. *Tetrahedron Lett.* **47**, 2319–2321 (2006).
42. R. T. Buck, D. M. Coe, M. J. Drysdale, L. Ferris, D. Haigh, C. J. Moody, N. D. Pearson, J. B. Sanghera, Asymmetric rhodium carbene insertion into the Si–H bond: Identification of new dirhodium(II) carboxylate catalysts using parallel synthesis techniques. *Tetrahedron Asymmetry* **14**, 791–816 (2003).
43. R. T. Buck, D. M. Coe, M. J. Drysdale, C. J. Moody, N. D. Pearson, Parallel synthesis techniques in the identification of new chiral dirhodium(II) carboxylates for asymmetric carbenoid insertion reactions. *Tetrahedron Lett.* **39**, 7181–7184 (1998). See also reference 47.
44. M. P. Doyle, W. Hu, I. M. Phillips, C. J. Moody, A. G. Pepper, A. M. Z. Slawin, Reactivity enhancement for chiral dirhodium(II) tetrakis(carboxamidates). *Adv. Synth. Catal.* **343**, 112–117 (2001).
45. S. Kitagaki, M. Kinoshita, M. Takeba, M. Anada, S. Hashimoto, Enantioselective Si–H insertion of methyl phenyldiazoacetate catalyzed by dirhodium(II) carboxylates incorporating *N*-phthaloyl-(*S*)-amino acids as chiral bridging ligands. *Tetrahedron Asymmetry* **11**, 3855–3859 (2000).
46. H. M. L. Davies, T. Hansen, J. Rutberg, P. R. Bruzinski, Rhodium (II) (*S*)-*N*-(arylsulfonyl)prolinate catalyzed asymmetric insertions of vinyl- and phenylcarbenoids into the Si–H bond. *Tetrahedron Lett.* **38**, 1741–1744 (1997).
47. R. T. Buck, M. P. Doyle, M. J. Drysdale, L. Ferris, D. C. Forbes, D. Haigh, C. J. Moody, N. D. Pearson, Q.-L. Zhou, Asymmetric rhodium carbenoid insertion into the Si–H bond. *Tetrahedron Lett.* **37**, 7631–7634 (1996).
48. A. DeAngelis, R. Panish, J. M. Fox, Rh-catalyzed intermolecular reactions of  $\alpha$ -alkyl- $\alpha$ -diazo carbonyl compounds with selectivity over  $\beta$ -hydride migration. *Acc. Chem. Res.* **49**, 115–127 (2016).



49. Z. J. Wang, H. Renata, N. E. Peck, C. C. Farwell, P. S. Coelho, F. H. Arnold, Improved cyclopropanation activity of histidine-ligated cytochrome P450 enables the enantioselective formal synthesis of levomilnacipran. *Angew. Chem. Int. Ed.* **53**, 6810–6813 (2014).
50. T. K. Hyster, C. C. Farwell, A. R. Buller, J. A. McIntosh, F. H. Arnold, Enzyme-controlled nitrogen-atom transfer enables regiodivergent C-H amination. *J. Am. Chem. Soc.* **136**, 15505–15508 (2014).
51. P. S. Coelho, Z. J. Wang, M. E. Ener, S. A. Baril, A. Kannan, F. H. Arnold, E. M. Brustad, A serine-substituted P450 catalyzes highly efficient carbene transfer to olefins in vivo. *Nat. Chem. Biol.* **9**, 485–487 (2013).
52. H. Renata, R. D. Lewis, M. J. Sweredoski, A. Moradian, S. Hess, Z. J. Wang, F. H. Arnold, Identification of mechanism-based inactivation in P450-catalyzed cyclopropanation facilitates engineering of improved enzymes. *J. Am. Chem. Soc.* **138**, 12527–12533 (2016).
53. M. Bordeaux, V. Tyagi, R. Fasan, Highly diastereoselective and enantioselective olefin cyclopropanation using engineered myoglobin-based catalysts. *Angew. Chem. Int. Ed.* **54**, 1744–1748 (2015).
54. Y. Landais, D. Planchenault, Preparation of optically active alpha-silylcarbonyl compounds using asymmetric alkylation of alpha-silylacetic esters and asymmetric metal-carbene insertion into the Si–H bond. *Tetrahedron* **53**, 2855–2870 (1997).
55. Y. Landais, L. Parra-Rapado, D. Planchenault, V. Weber, Mechanism of metal-carbenoid insertion into the Si–H bond. *Tetrahedron Lett.* **38**, 229–232 (1997).
56. C. Peng, Y. Wang, J. Wang, Palladium-catalyzed cross-coupling of  $\alpha$ -diazocarbonyl compounds with arylboronic acids. *J. Am. Chem. Soc.* **130**, 1566–1567 (2008).
57. L. Huang, W. D. Wulff, Catalytic asymmetric synthesis of trisubstituted aziridines. *J. Am. Chem. Soc.* **133**, 8892–8895 (2011).
58. E. J. Rayment, N. Summerhill, E. A. Anderson, Synthesis of phenols via fluoride-free oxidation of arylsilanes and arylmethoxysilanes. *J. Org. Chem.* **77**, 7052–7060 (2012).
59. W.-C. Liao, W.-H. Chen, C.-H. Chen, T.-S. Lim, T.-Y. Luh, Photoinduced electron transfer as a probe for the folding behavior of dimethylsilylene-spaced alternating donor–acceptor oligomers and polymers. *Macromolecules* **46**, 1305–1311 (2013).
60. F. T. Oakes, J. F. Sebastian, Direct observation of acyl anion equivalents by carbon-13 Fourier transform Nuclear Magnetic Resonance. *J. Org. Chem.* **45**, 4959–4961 (1980).
61. H. Rosenberg, T. T. Tsai, N. K. Ngo, Synthesis of carbonate-containing high-temperature poly(arylene-siloxanylenes). *J. Polym. Sci. A Polym. Chem.* **20**, 1–13 (1982).
62. T. K. Dougherty, Aromatic amine terminated silicone monomers, oligomers, and polymers therefrom. U.S. Patent no. 5,286,890 (1994).
63. D. S. Kim, S. C. Shim, Synthesis and properties of poly(silylenephenylene-vinylene)s. *J. Polym. Sci. A Polym. Chem.* **37**, 2263–2273 (1999).

64. B. Wang, H. W. Ma, Y. S. Wang, Y. Li, Synthesis and characterization of novel liquid crystalline polystyrene. *Chem. Lett.* **42**, 915–917 (2013).
65. A. Simonneau, M. Oestreich, 3-Silylated cyclohexa-1,4-dienes as precursors for gaseous hydrosilanes: The  $B(C_6F_5)_3$ -catalyzed transfer hydrosilylation of alkenes. *Angew. Chem. Int. Ed.* **52**, 11905–11907 (2013).
66. C. M. Kisukuri, D. J. Palmeira, T. S. Rodrigues, P. H. C. Camargo, L. H. Andrade, Bimetallic nanoshells as platforms for metallo- and biometallo-catalytic applications. *ChemCatChem* **8**, 171–179 (2016).
67. S. E. Denmark, R. C. Smith, W.-T. T. Chang, J. M. Muhihi, Cross-coupling reactions of aromatic and heteroaromatic silanolates with aromatic and heteroaromatic halides. *J. Am. Chem. Soc.* **131**, 3104–3118 (2009).

## X. NMR Spectra

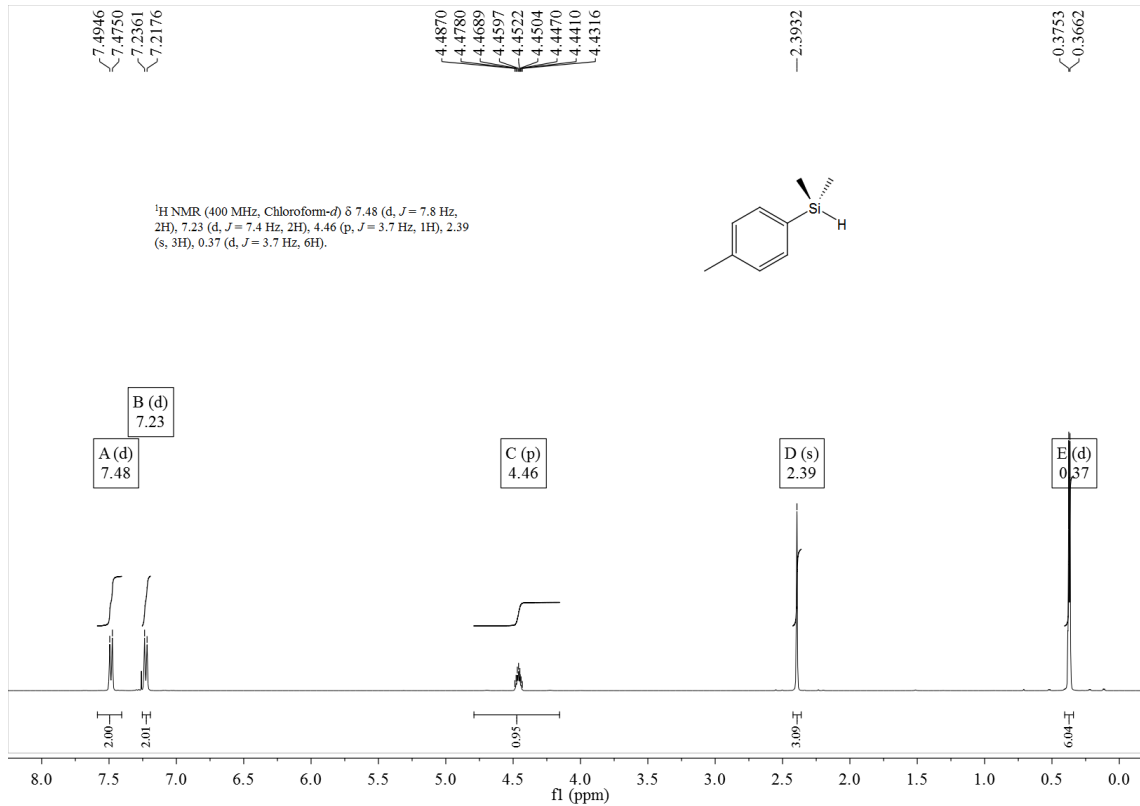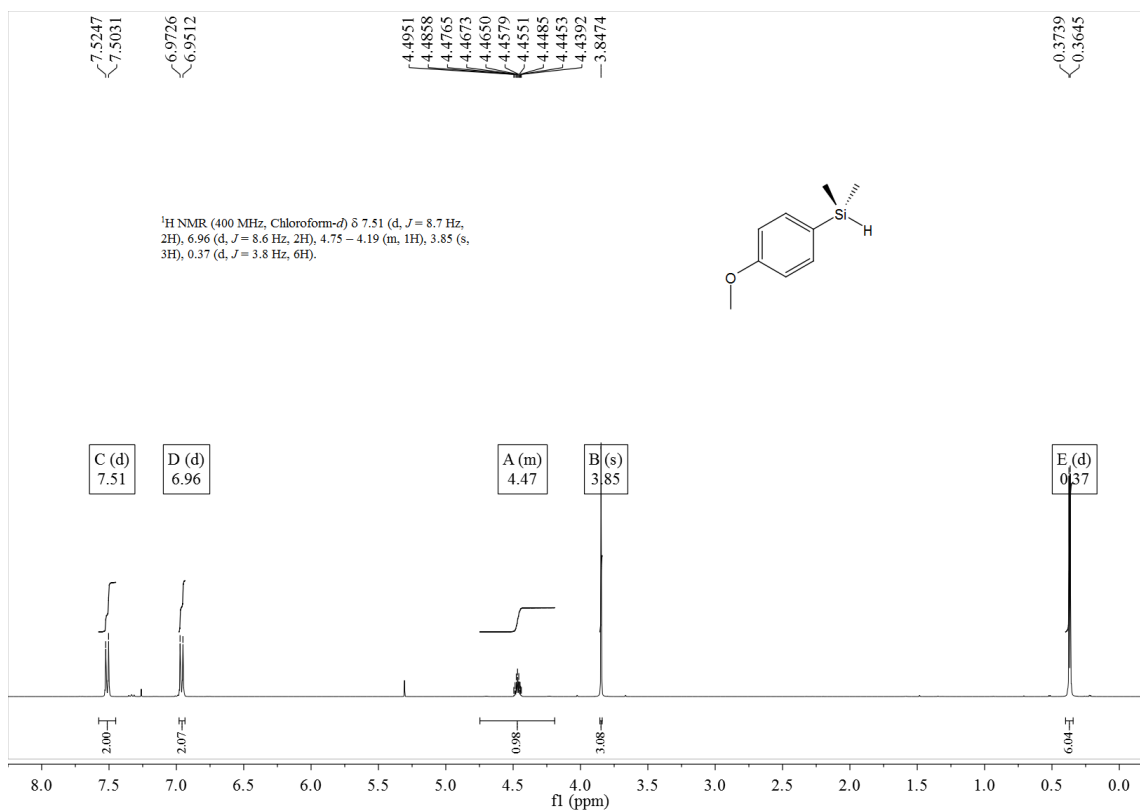

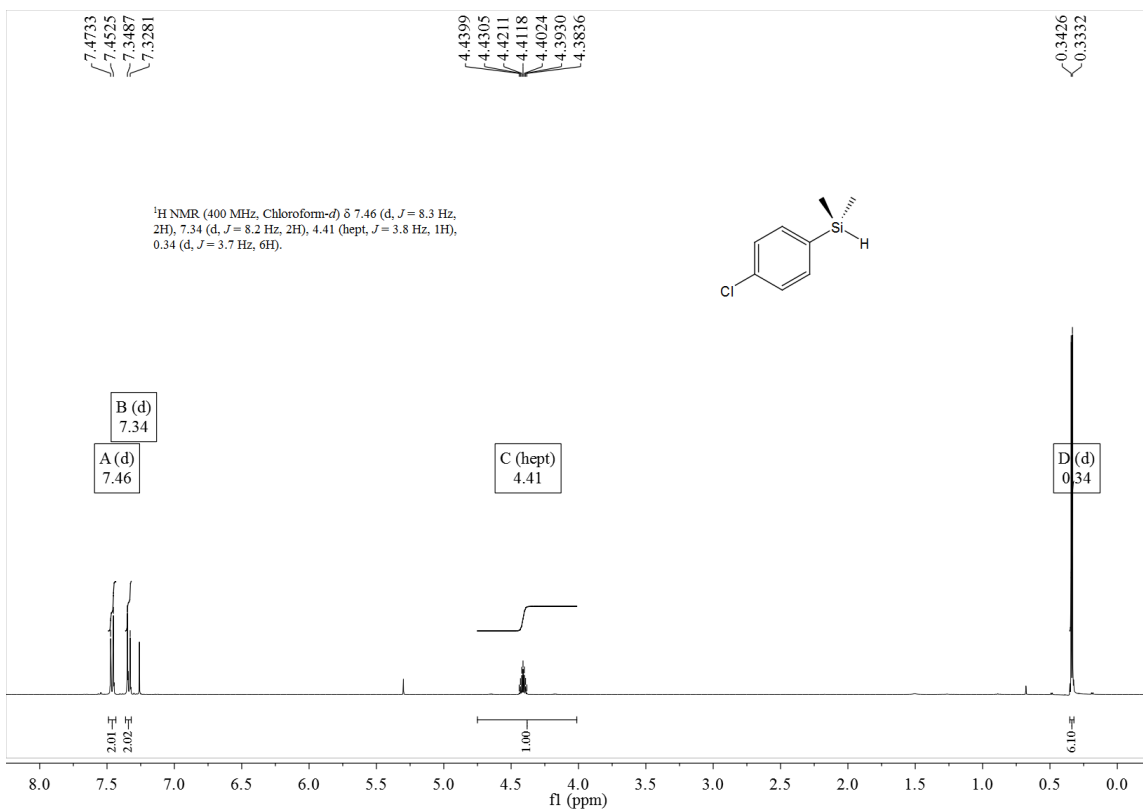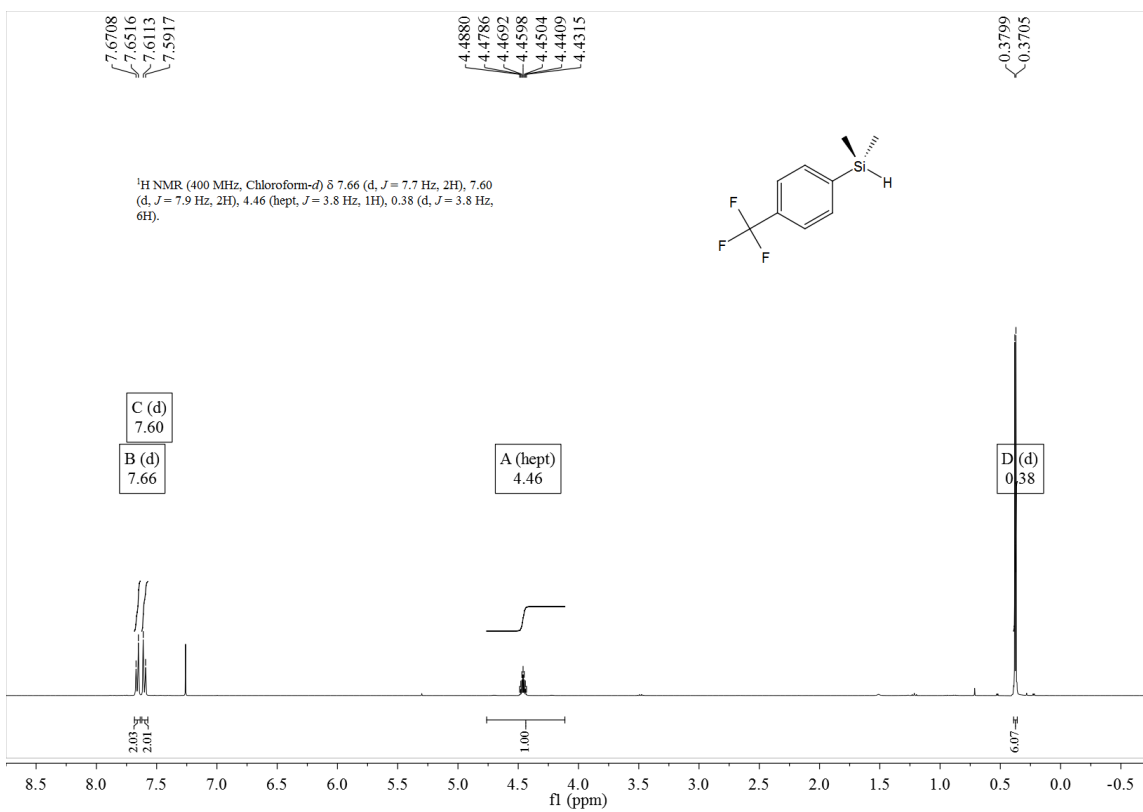

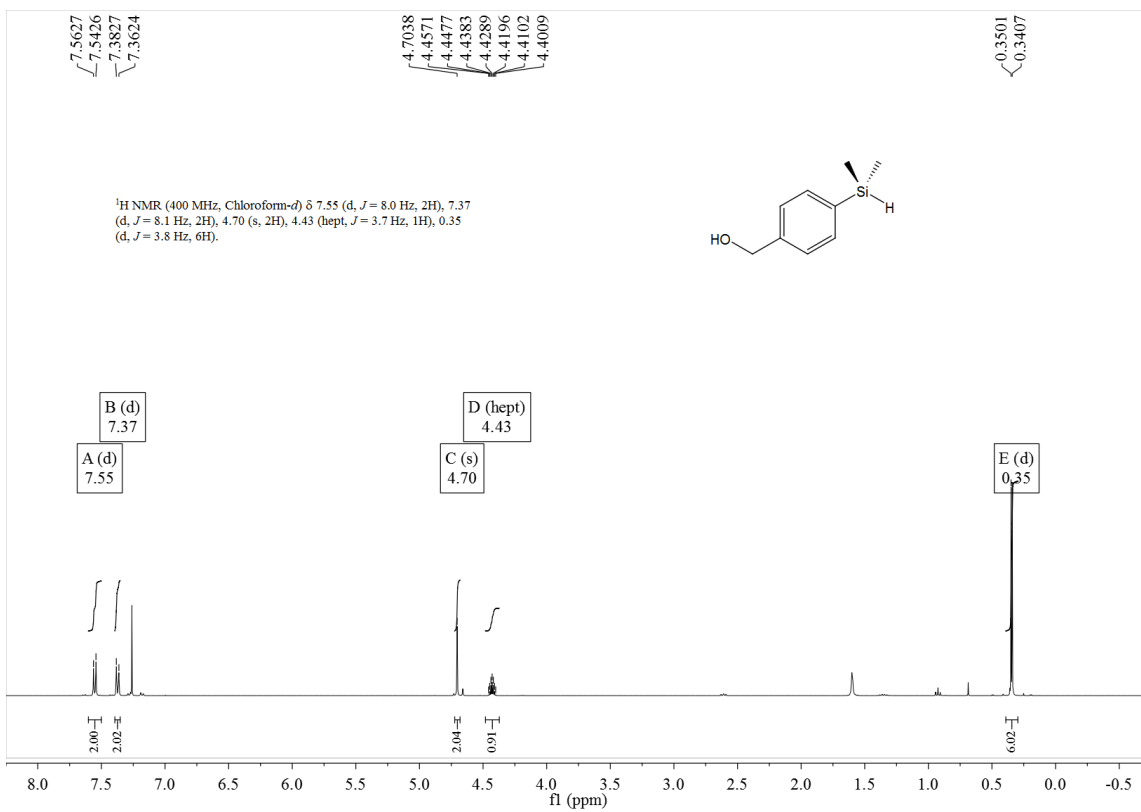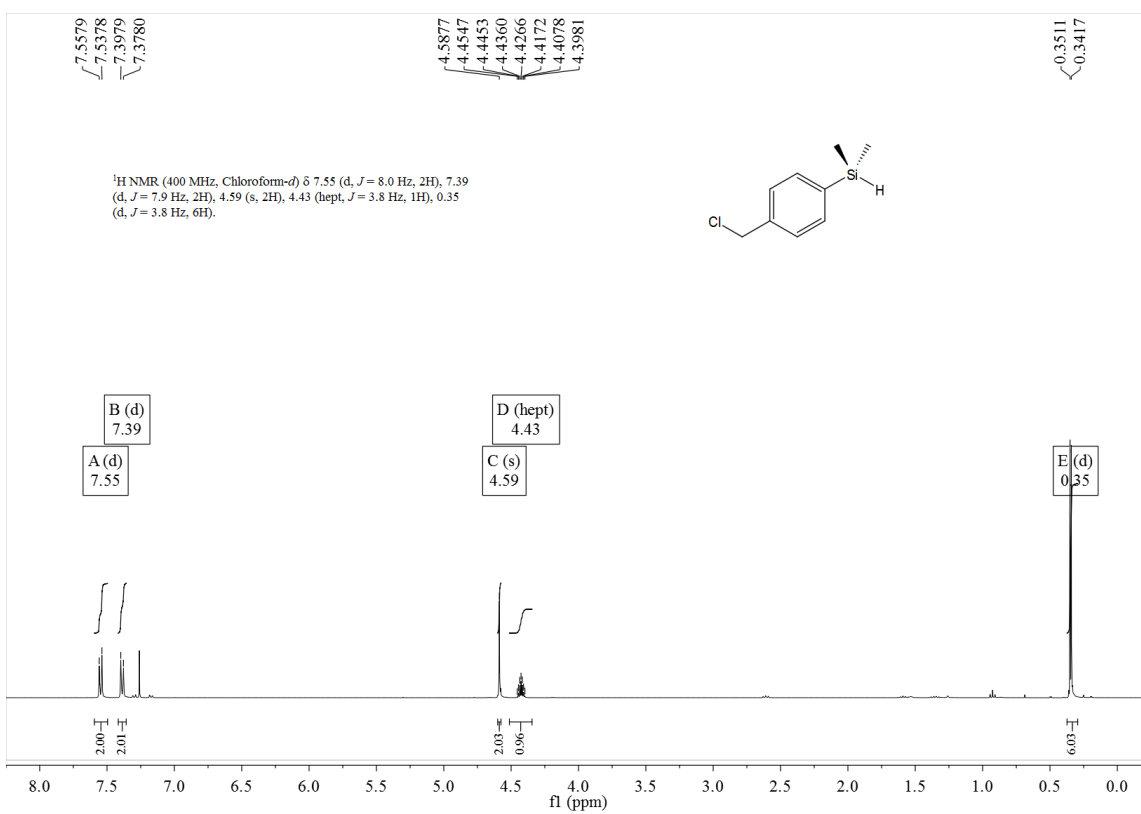

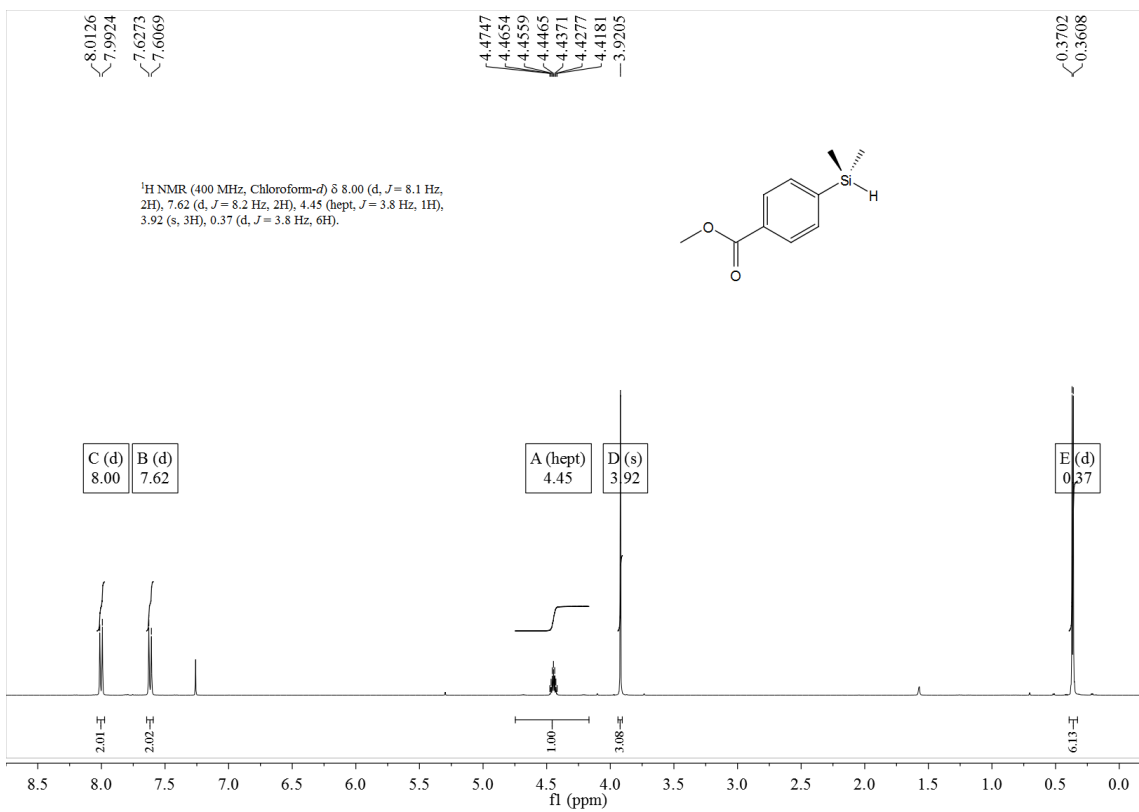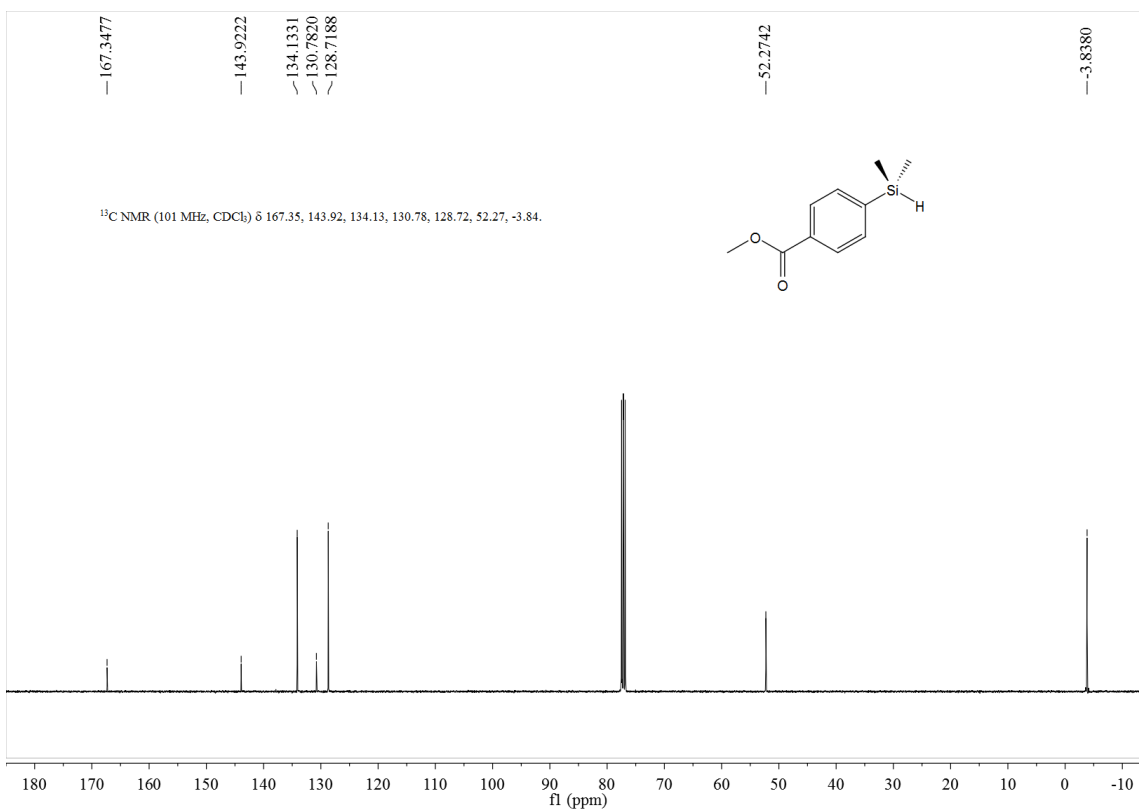

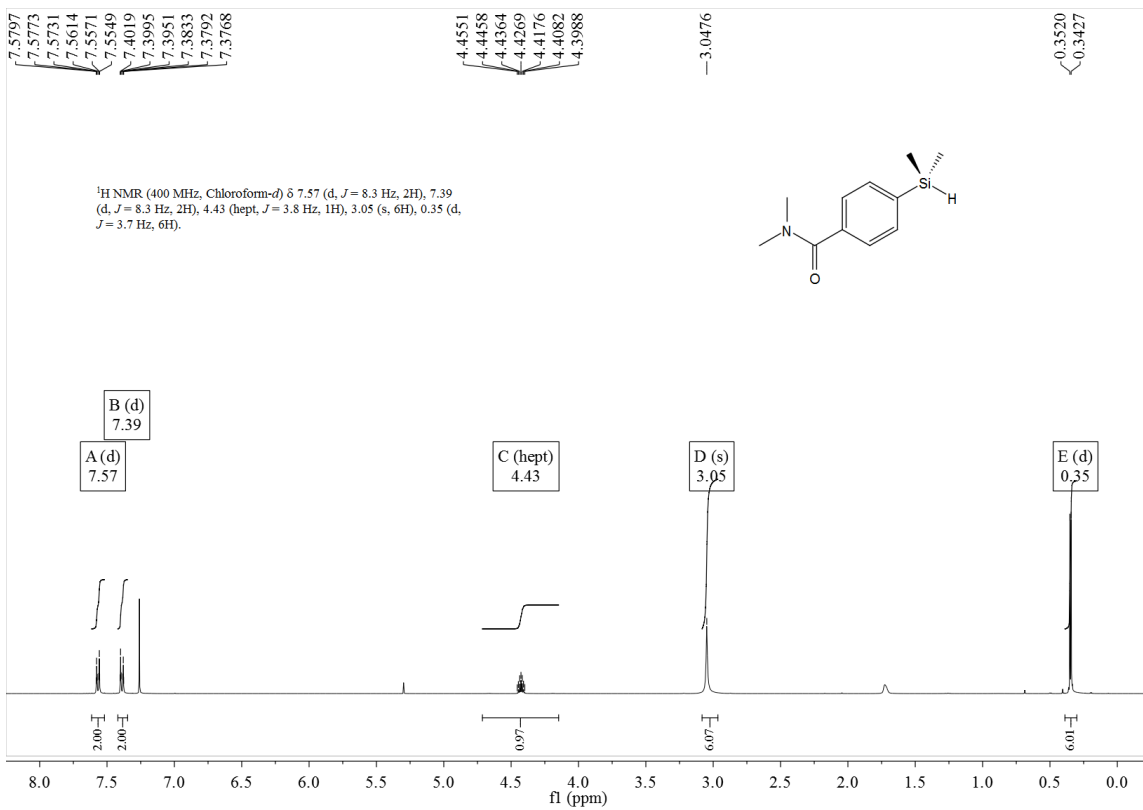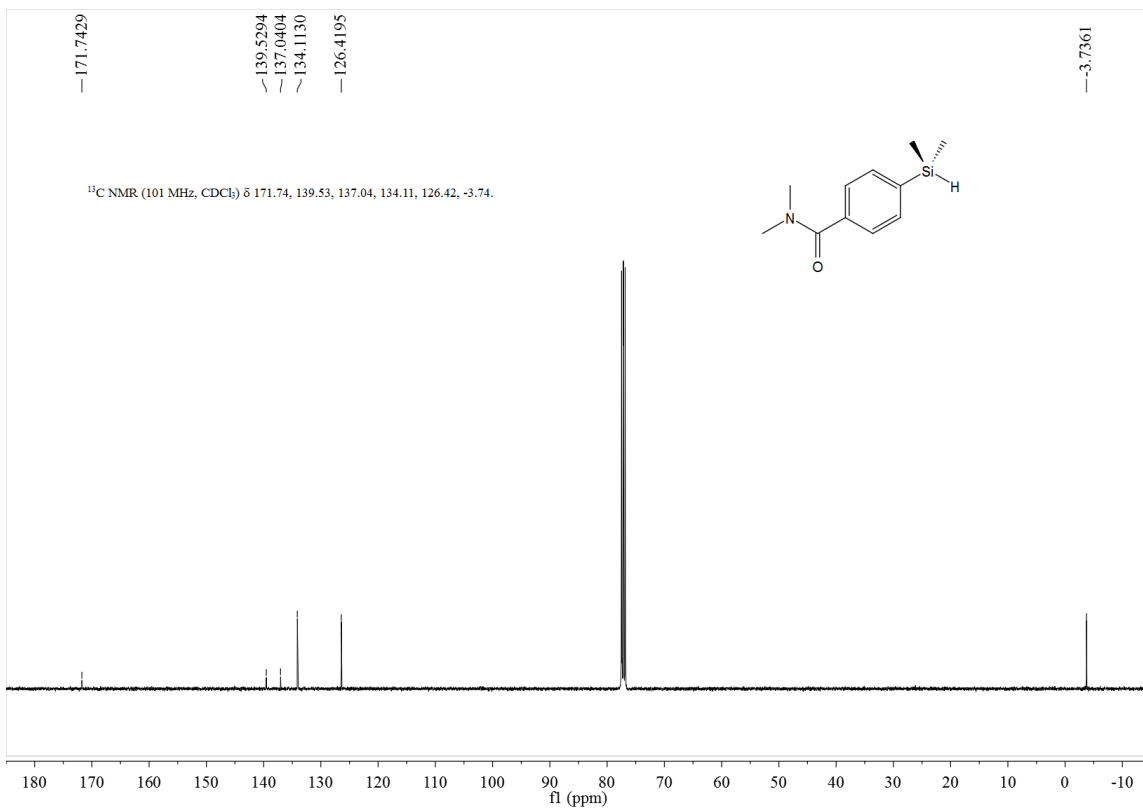

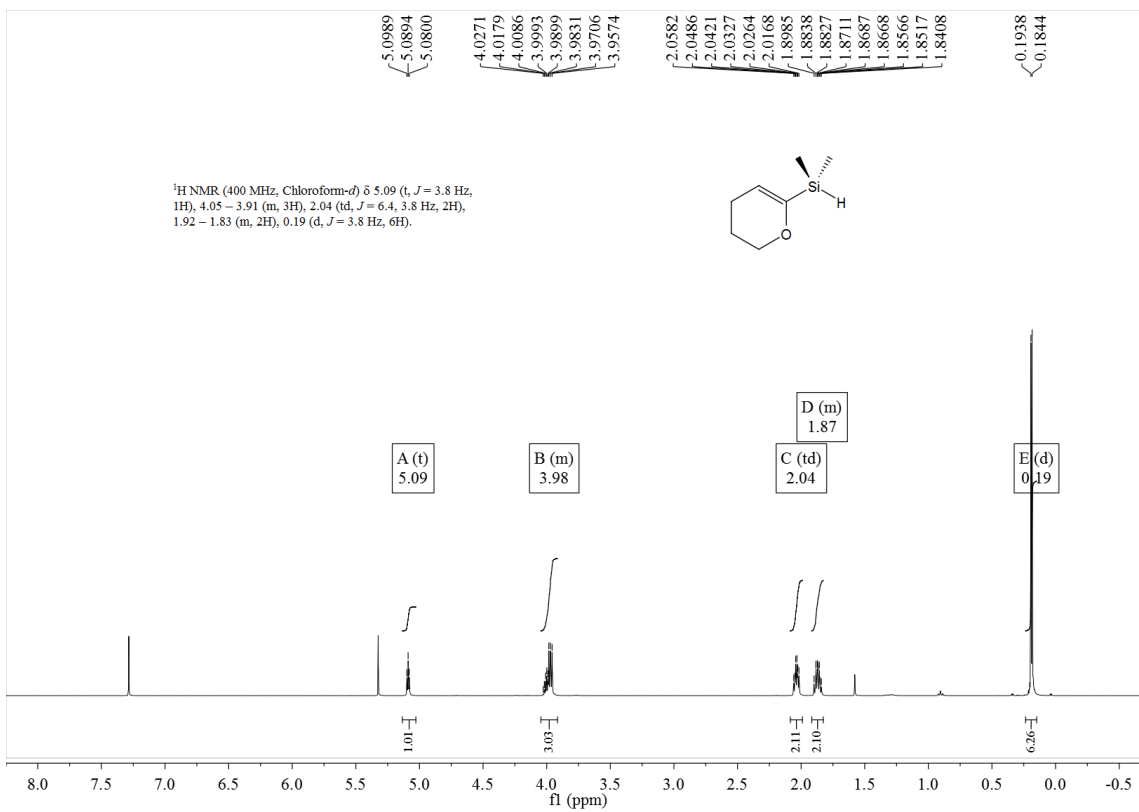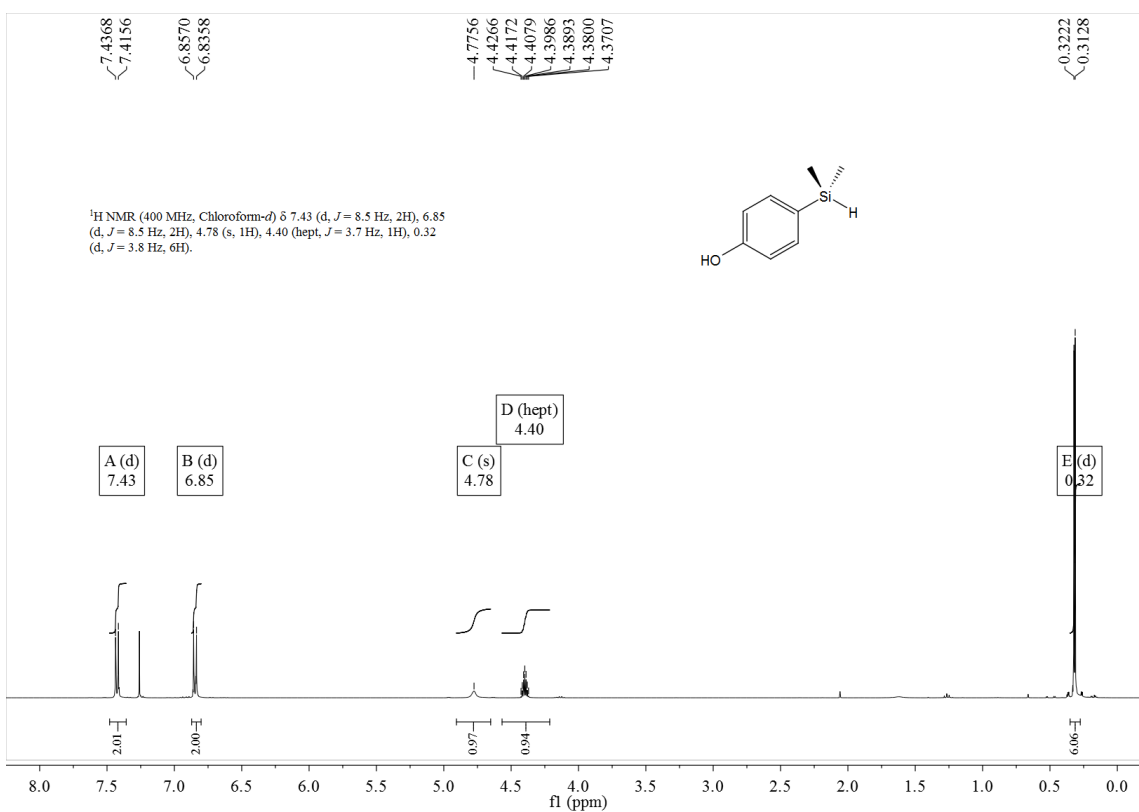



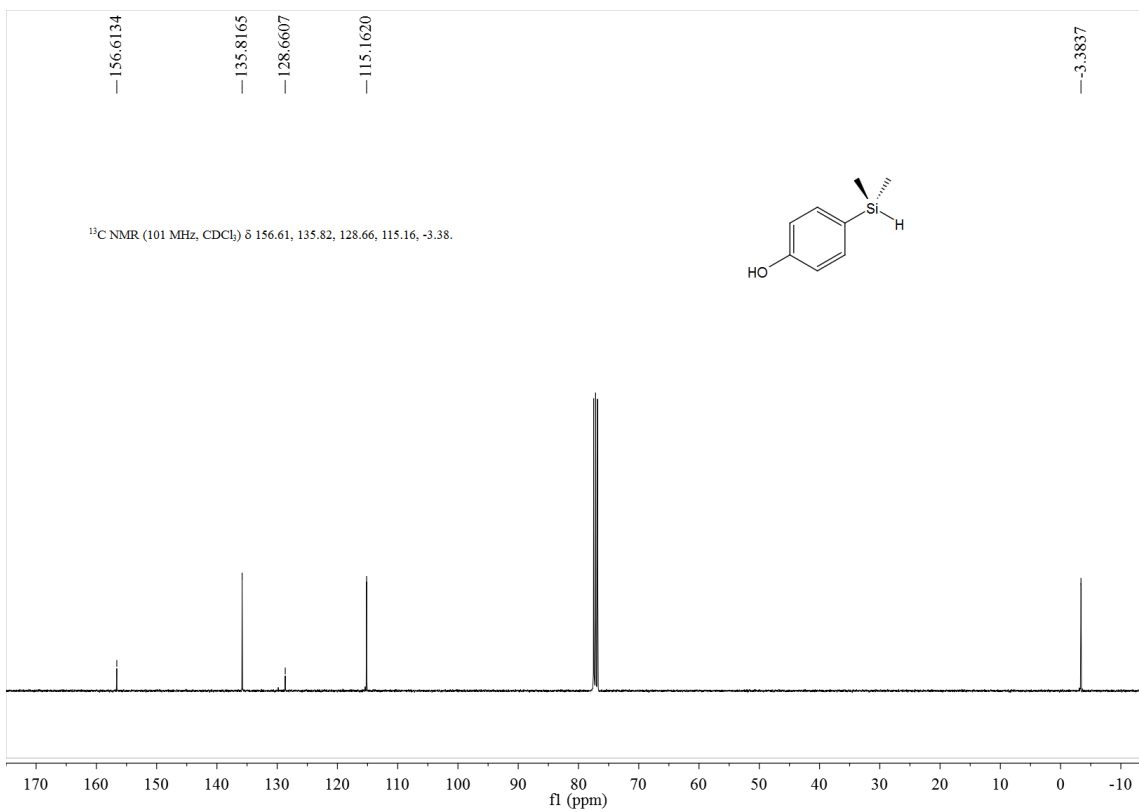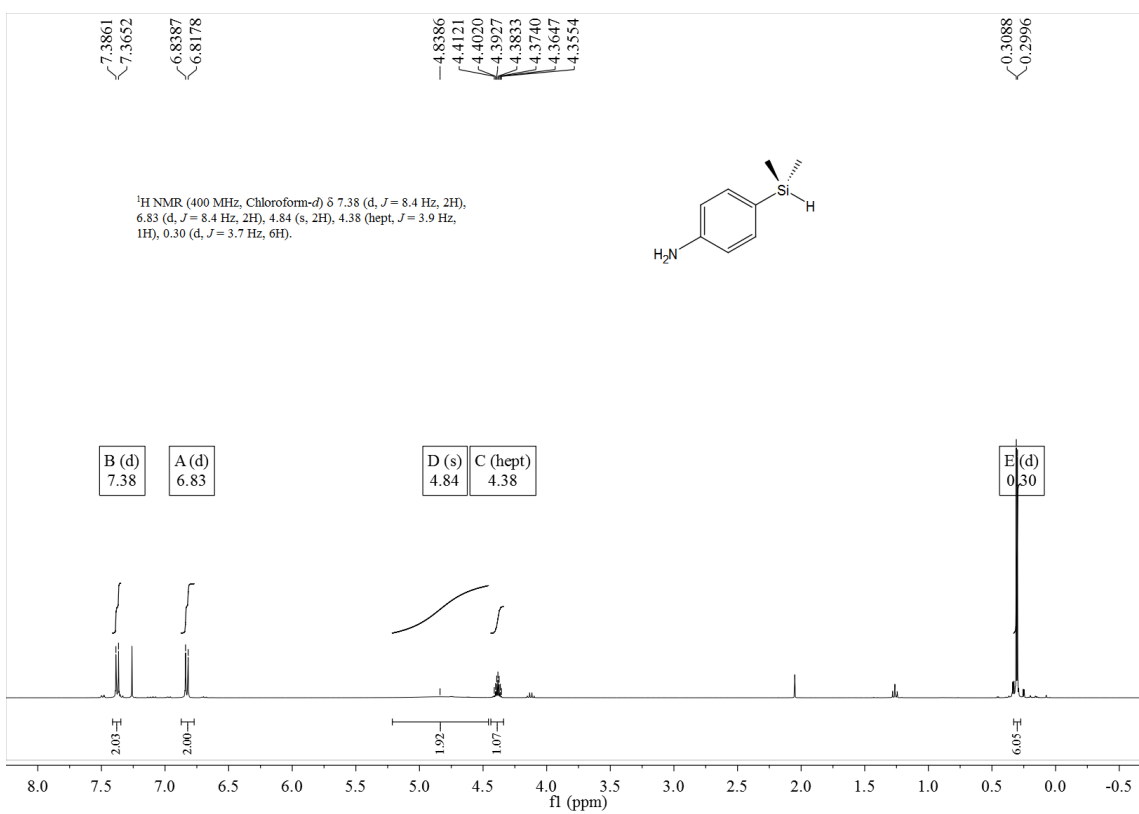

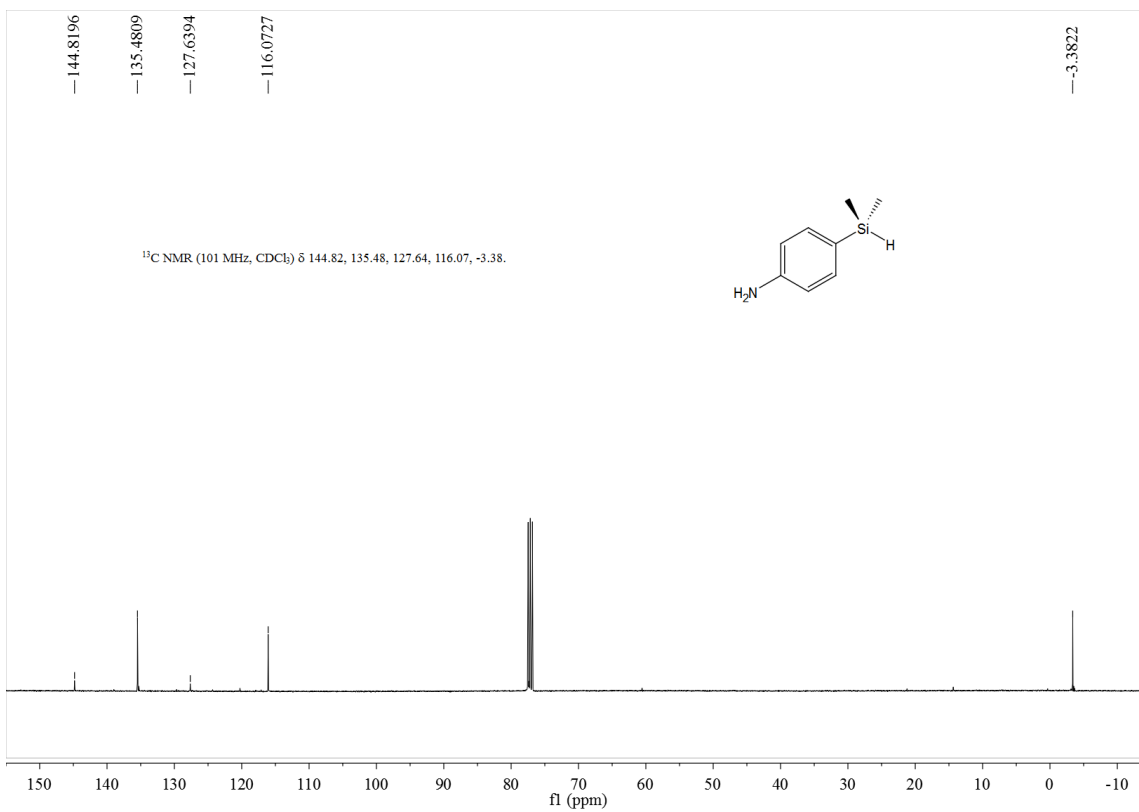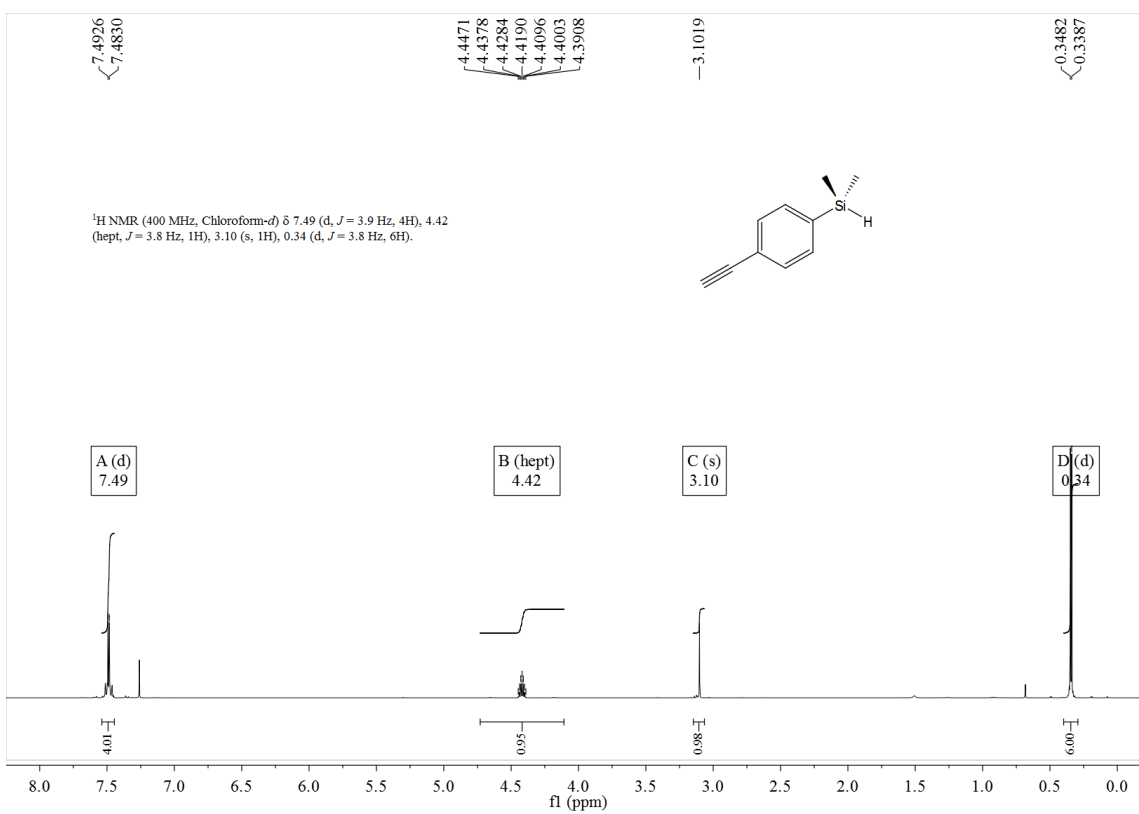

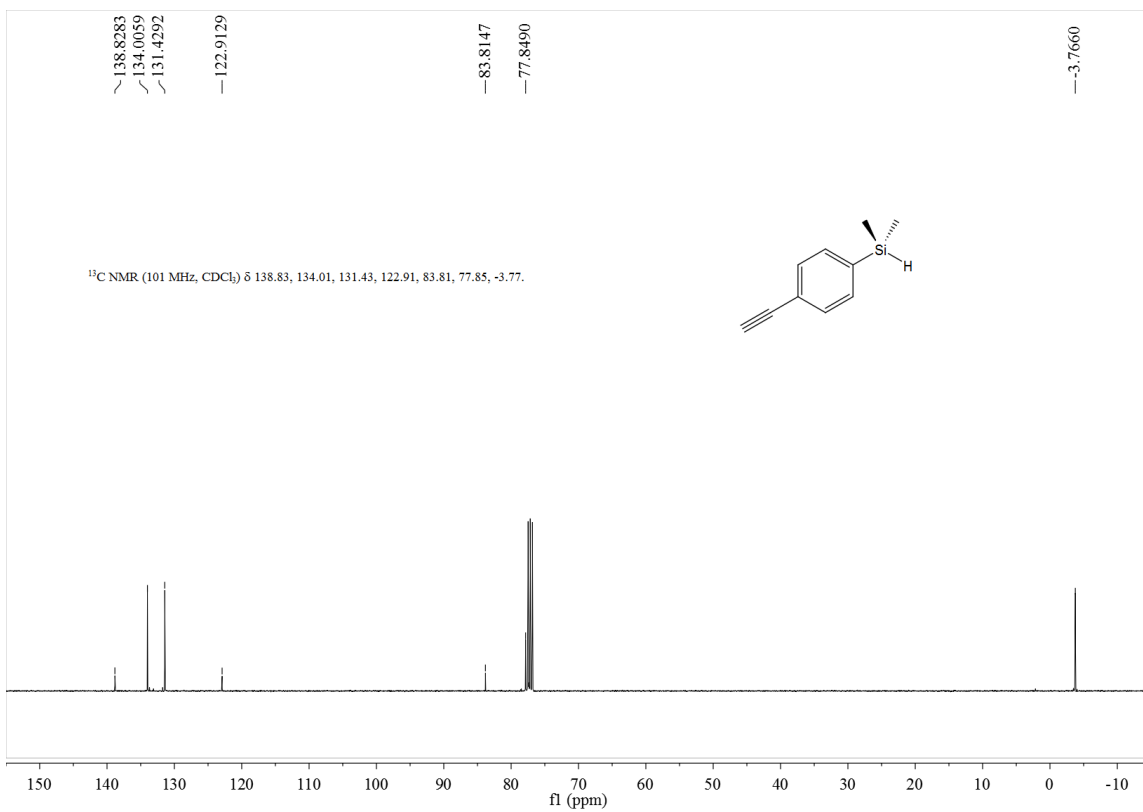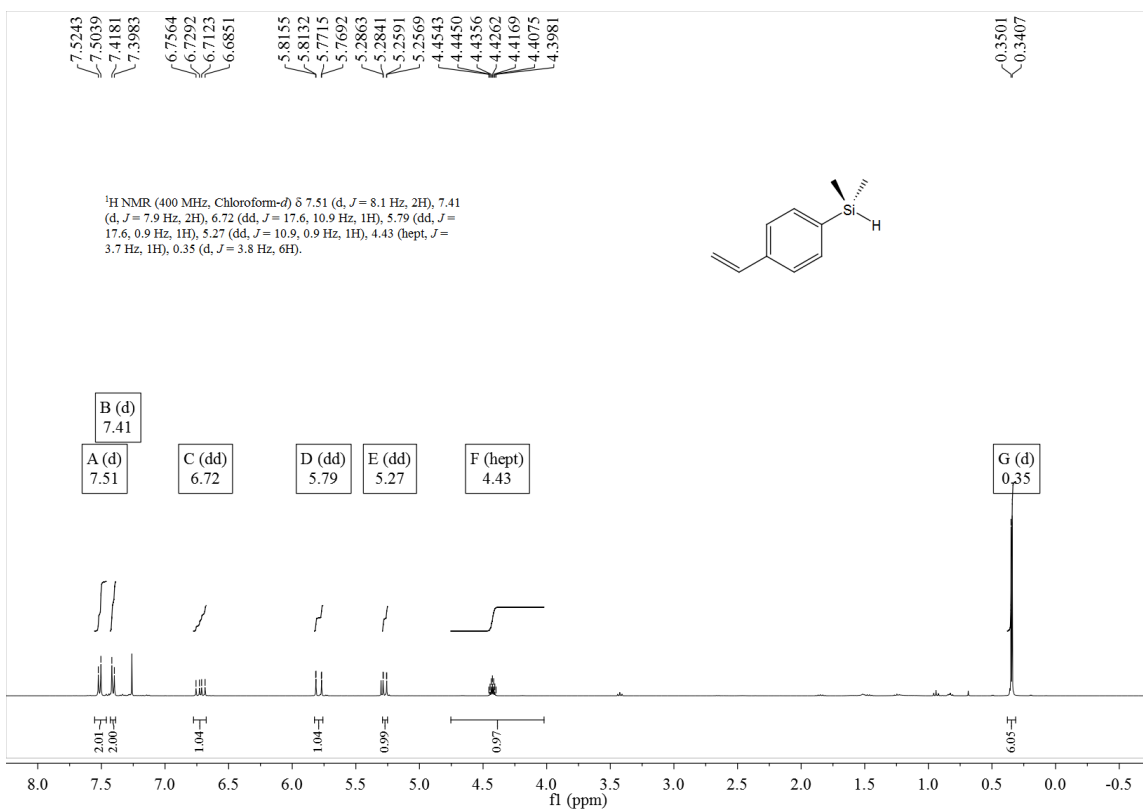

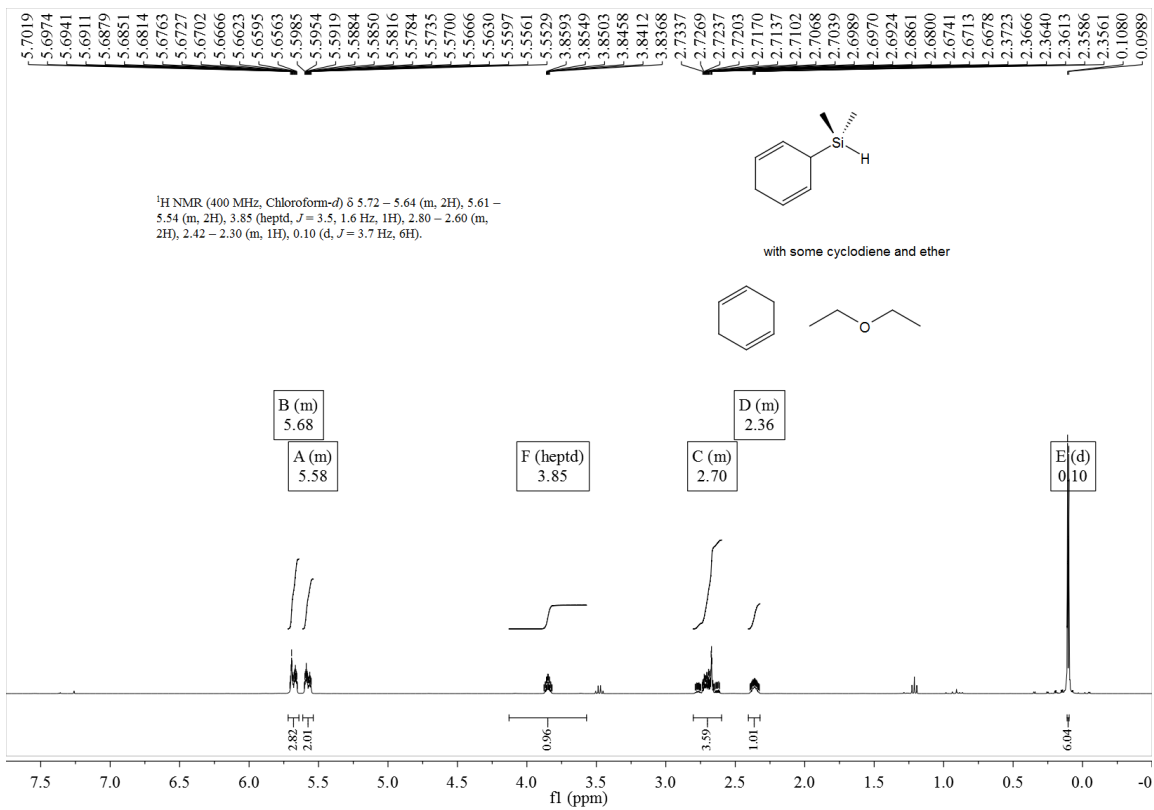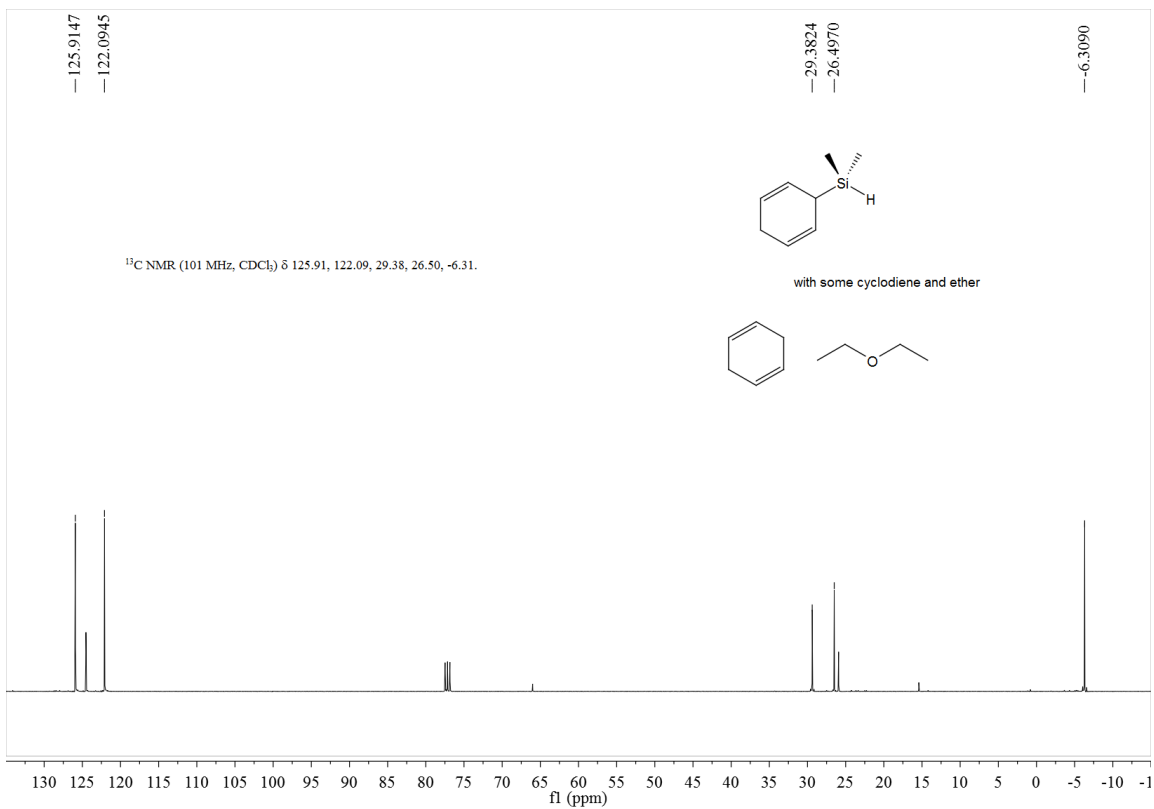

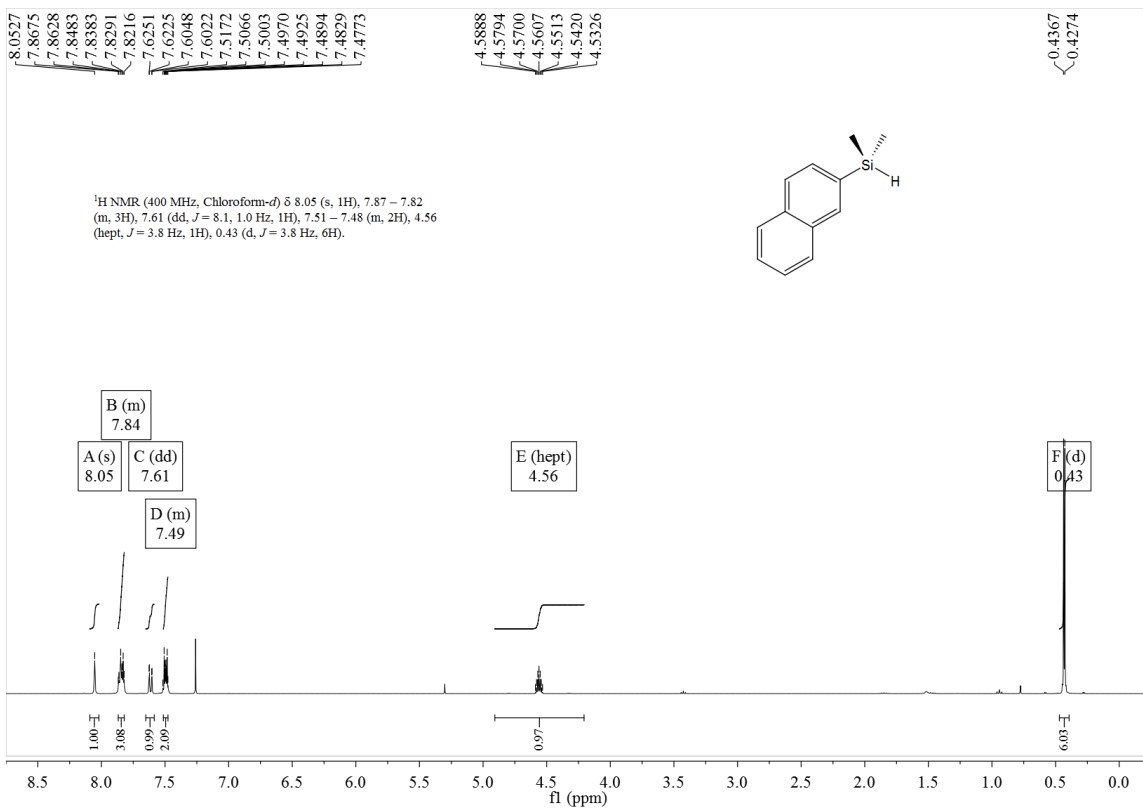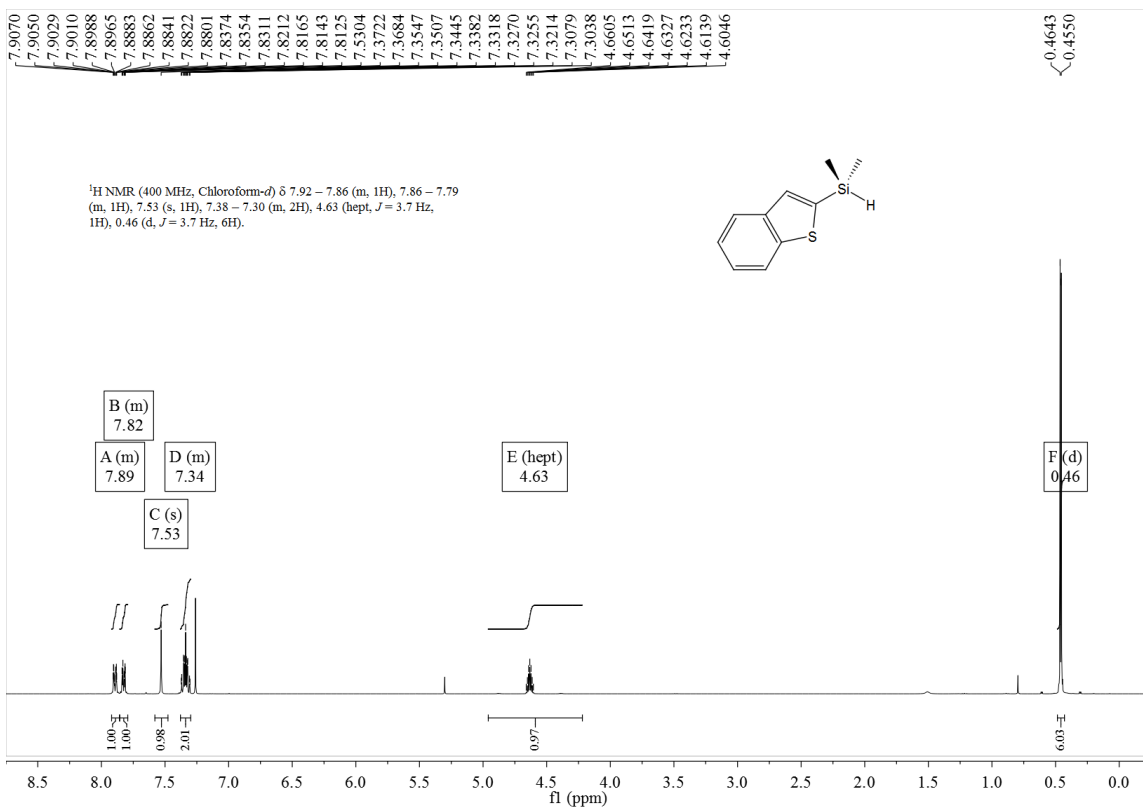

— 143.8658  
— 141.0793  
— 138.5711  
— 132.1820  
— 124.4736  
— 124.1998  
— 123.6306  
— 122.3244

— -2.9266

<sup>13</sup>C NMR (101 MHz, CDCl<sub>3</sub>) δ 143.87, 141.08, 138.57, 132.18, 124.47, 124.20, 123.63, 122.32, -2.93.

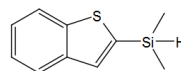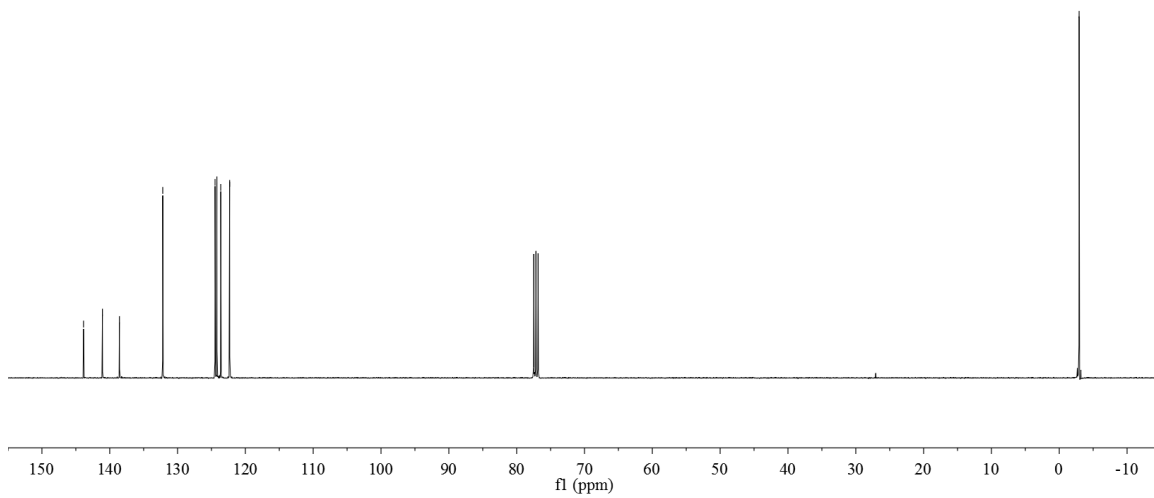

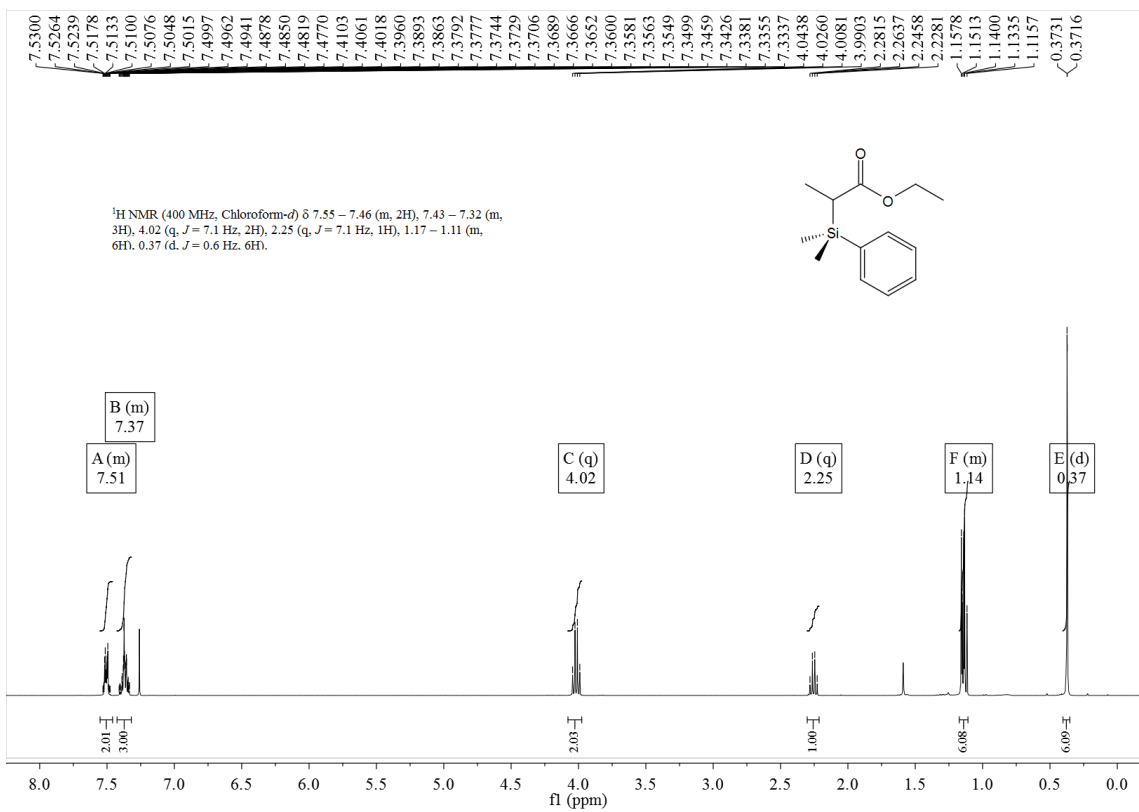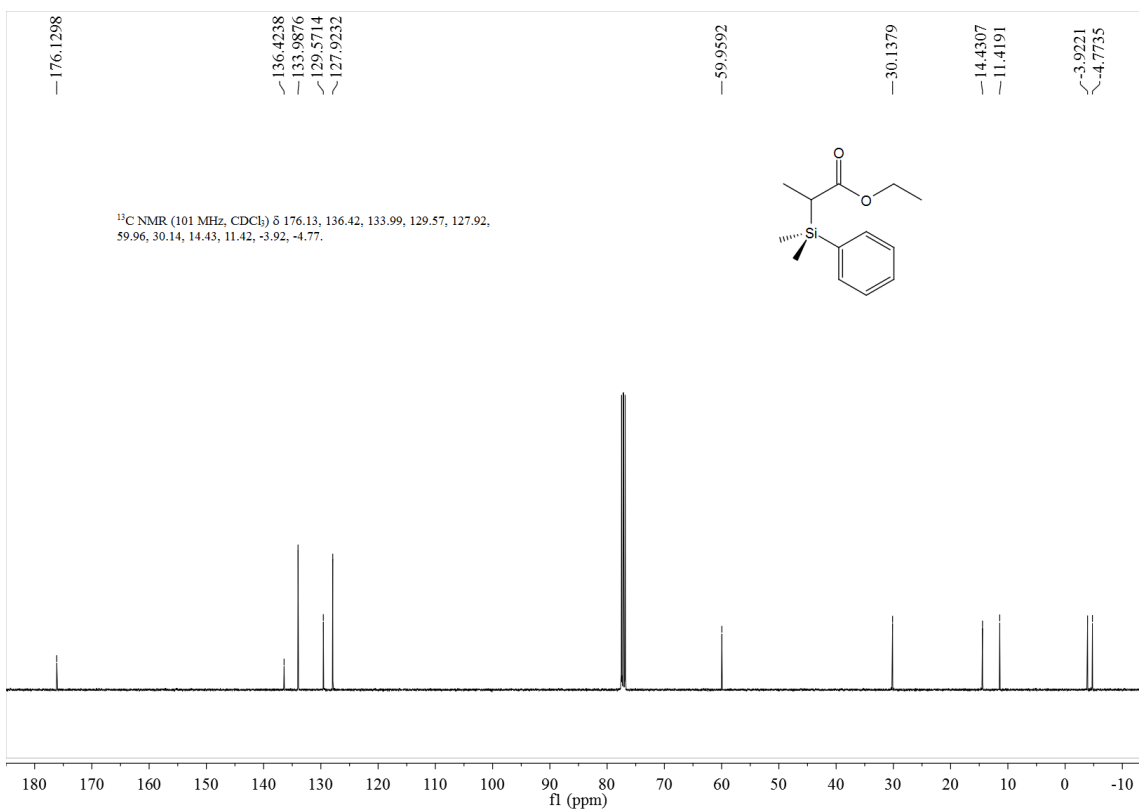

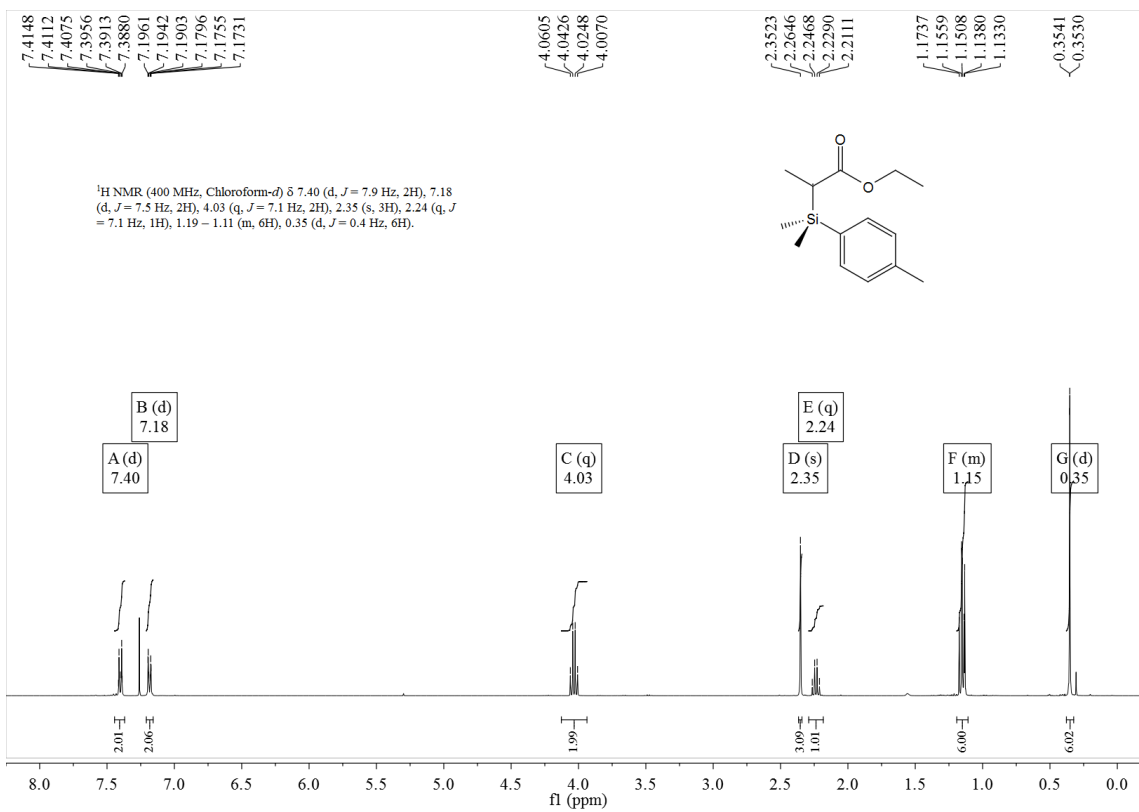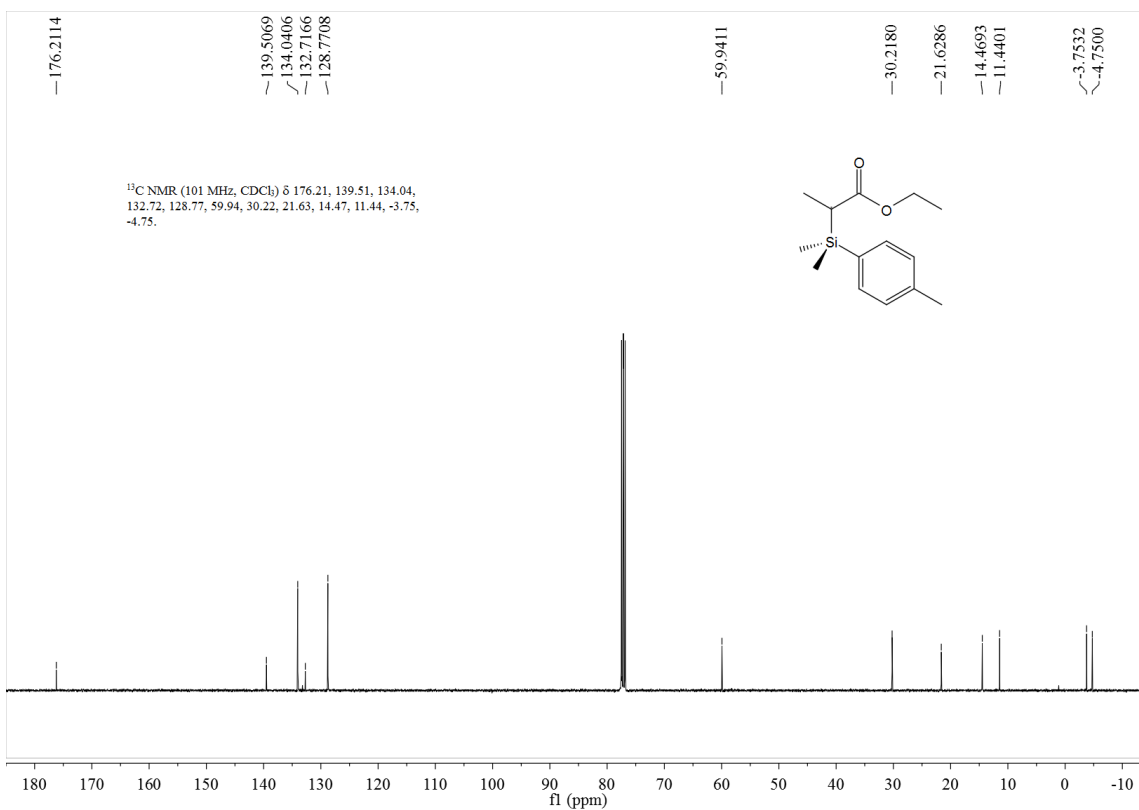



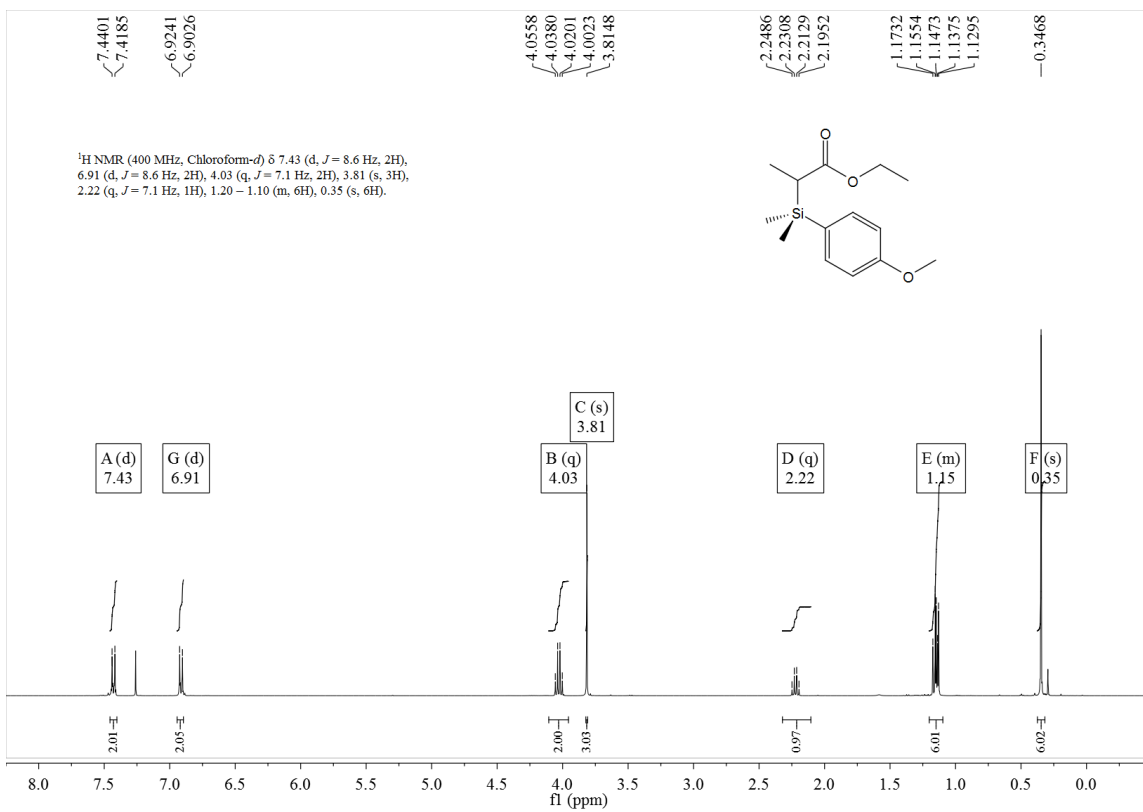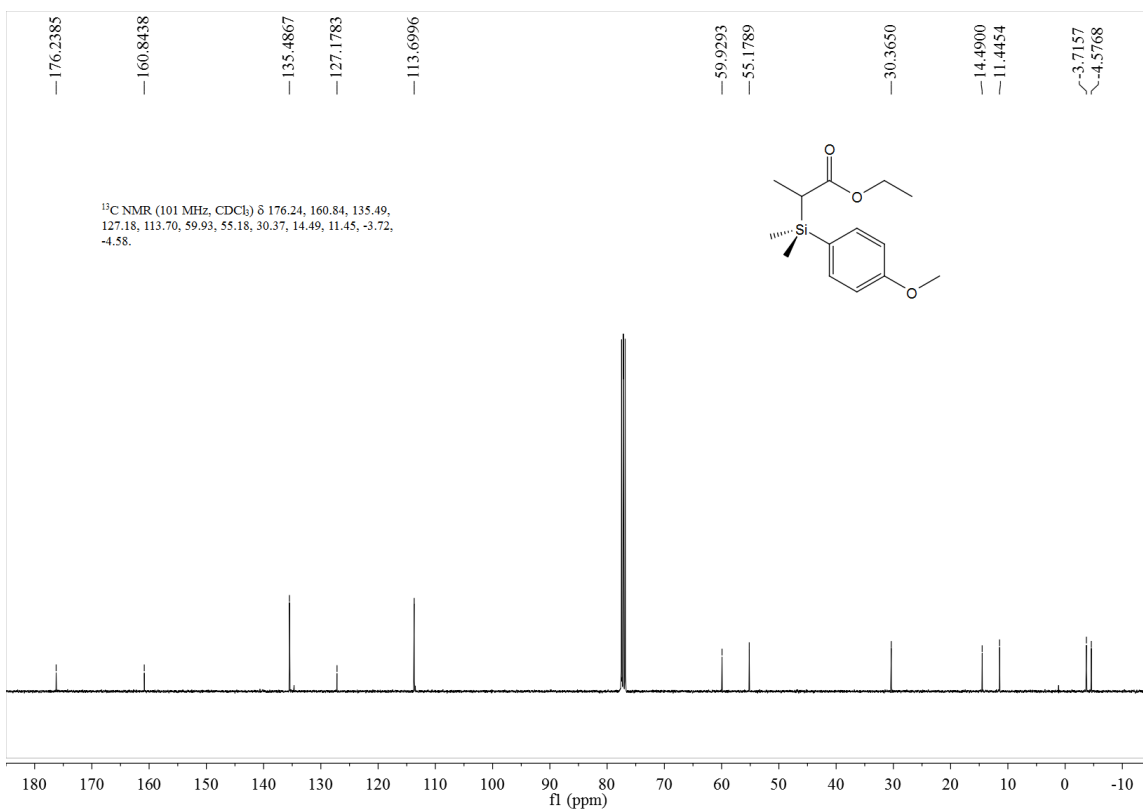

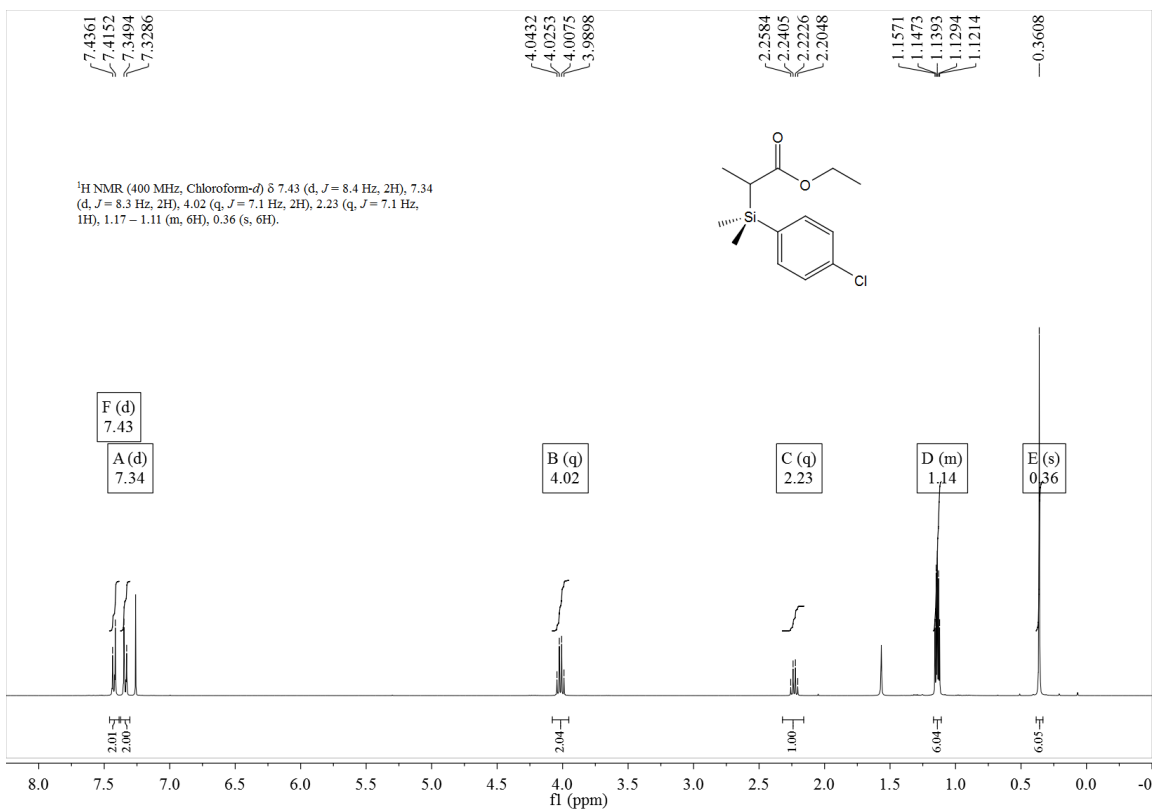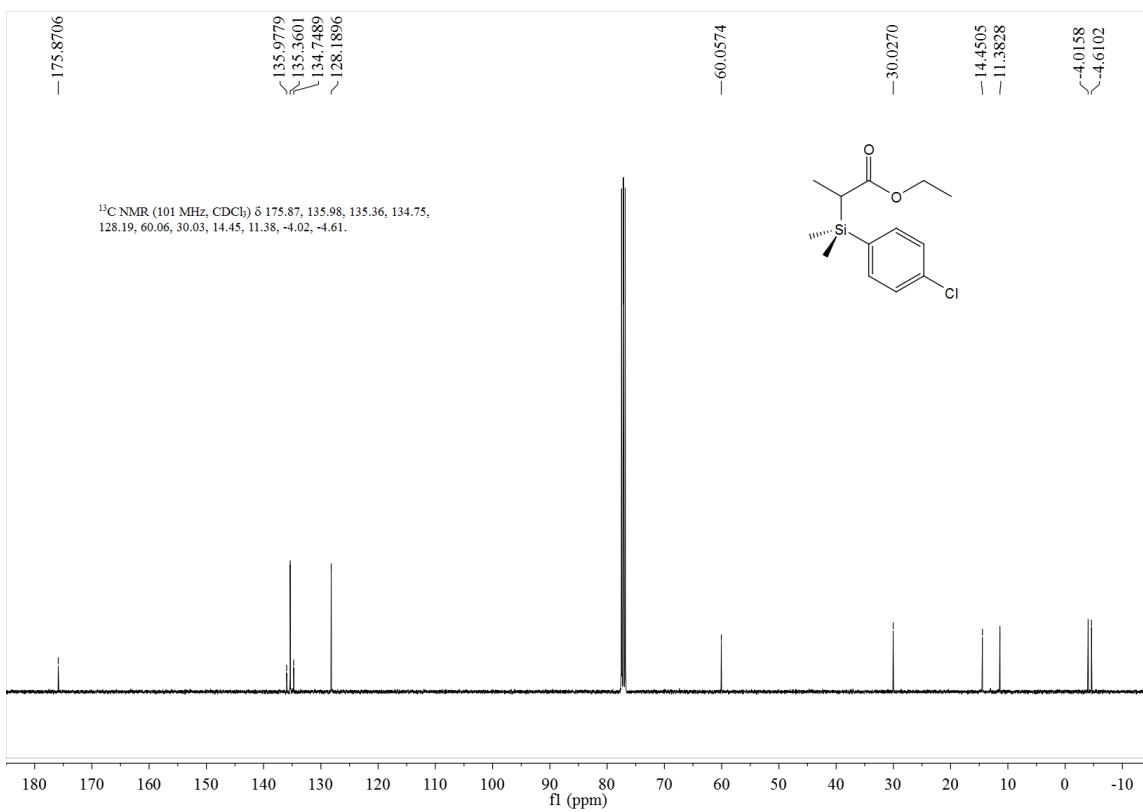

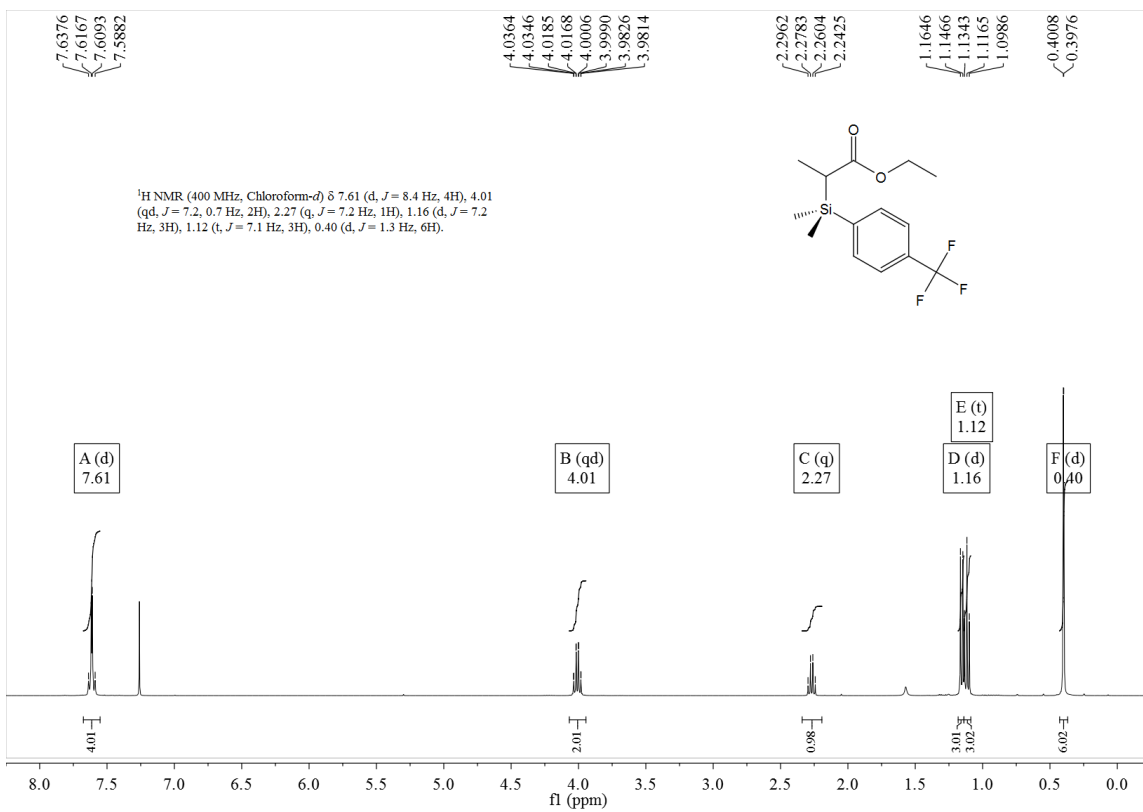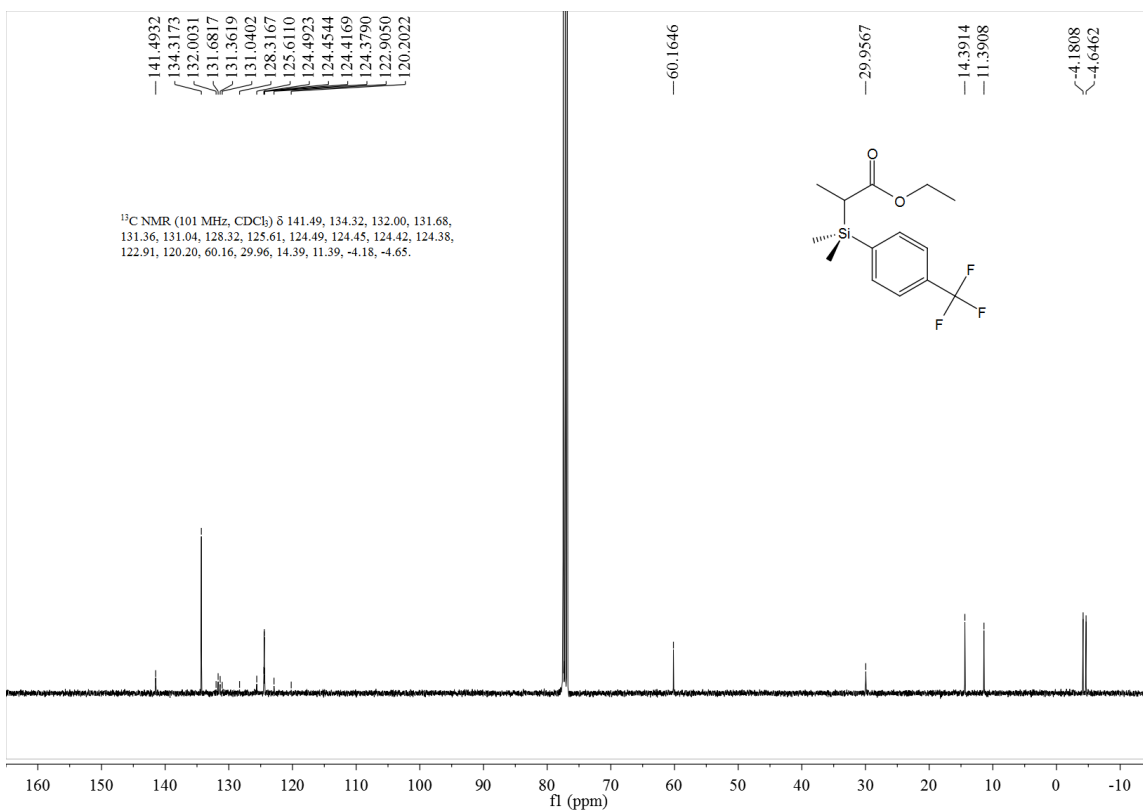

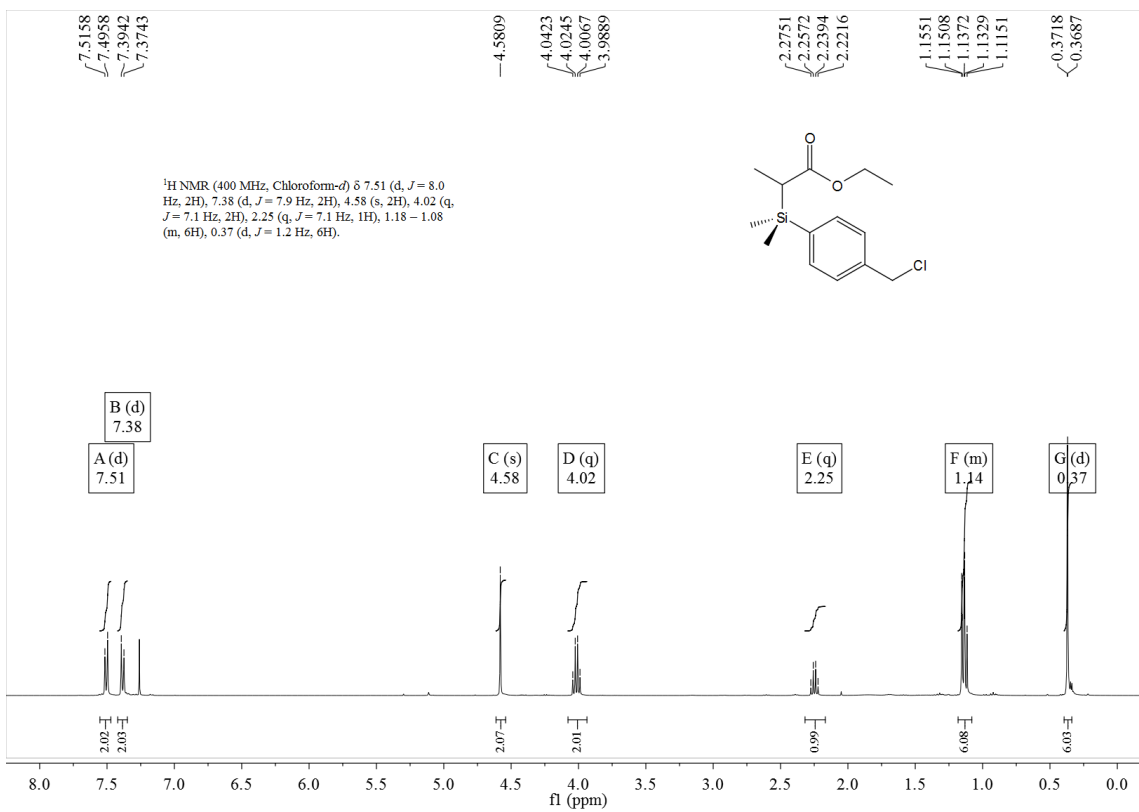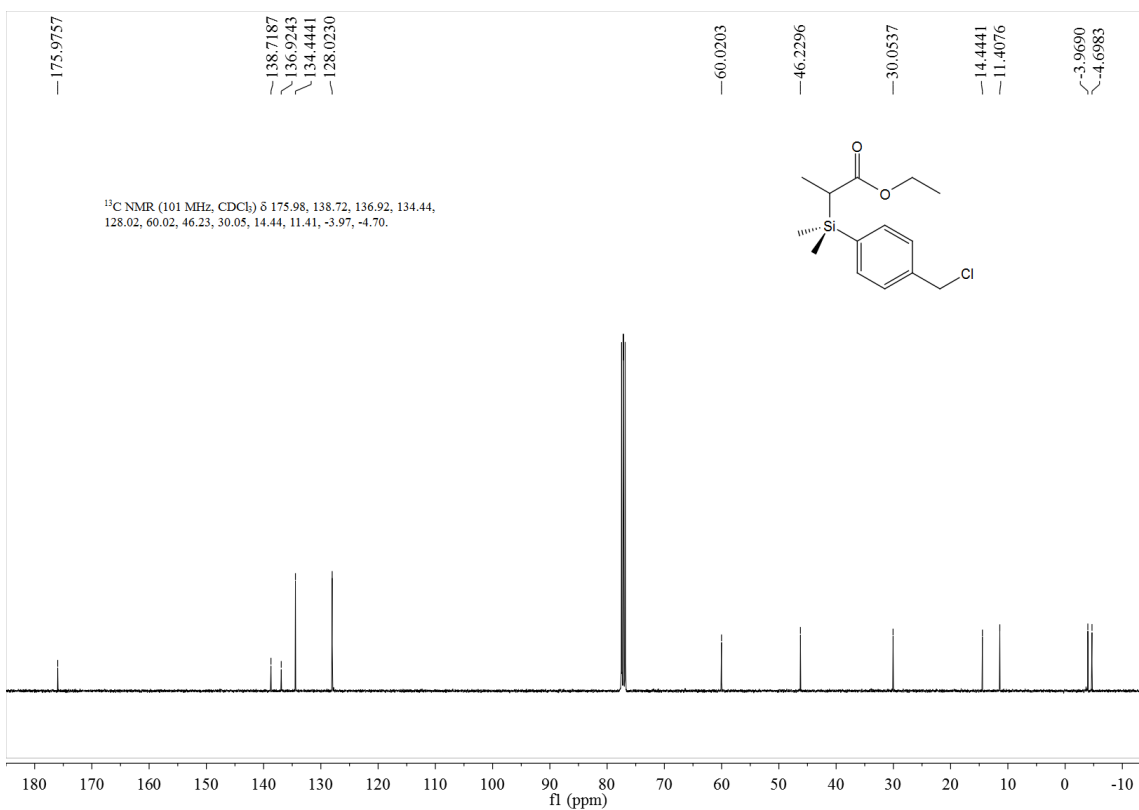

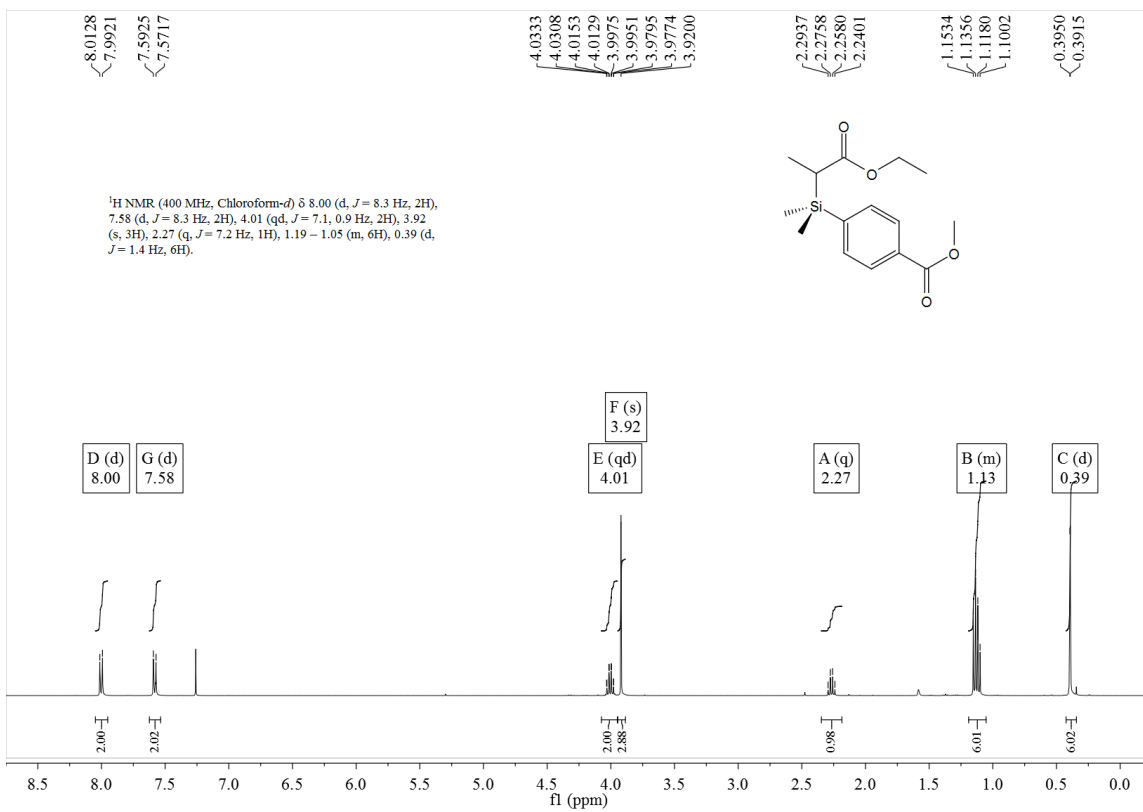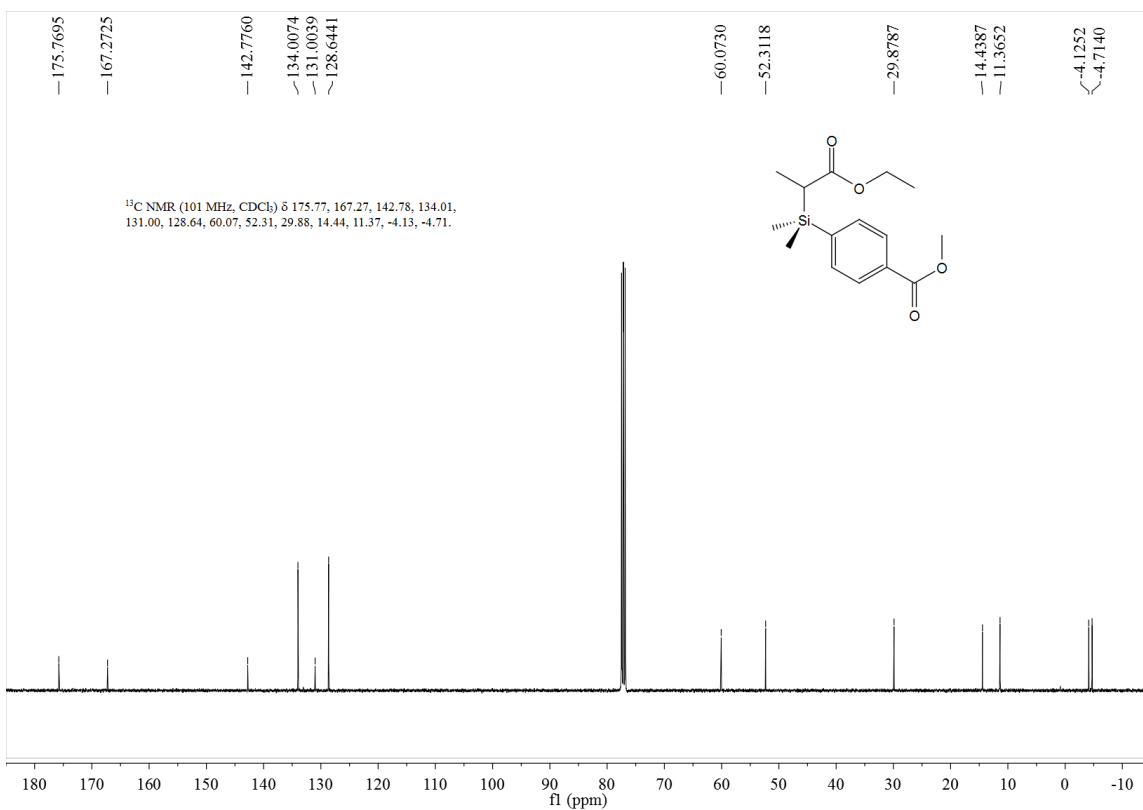

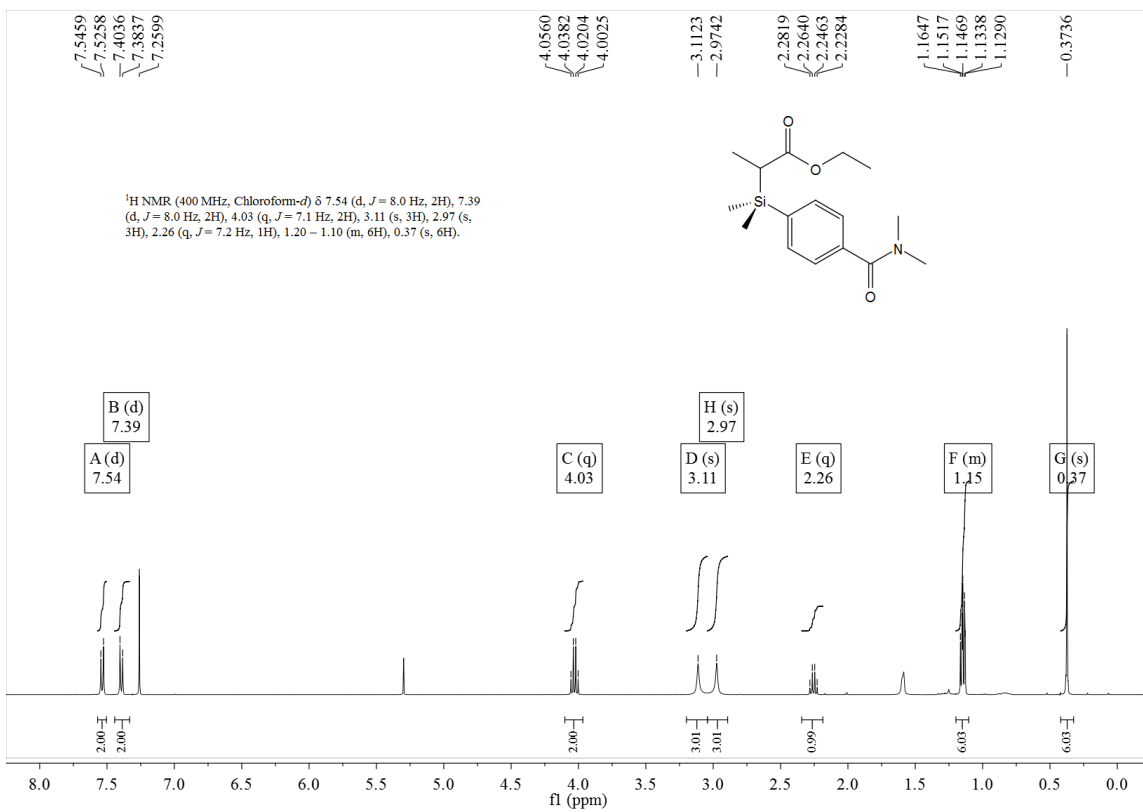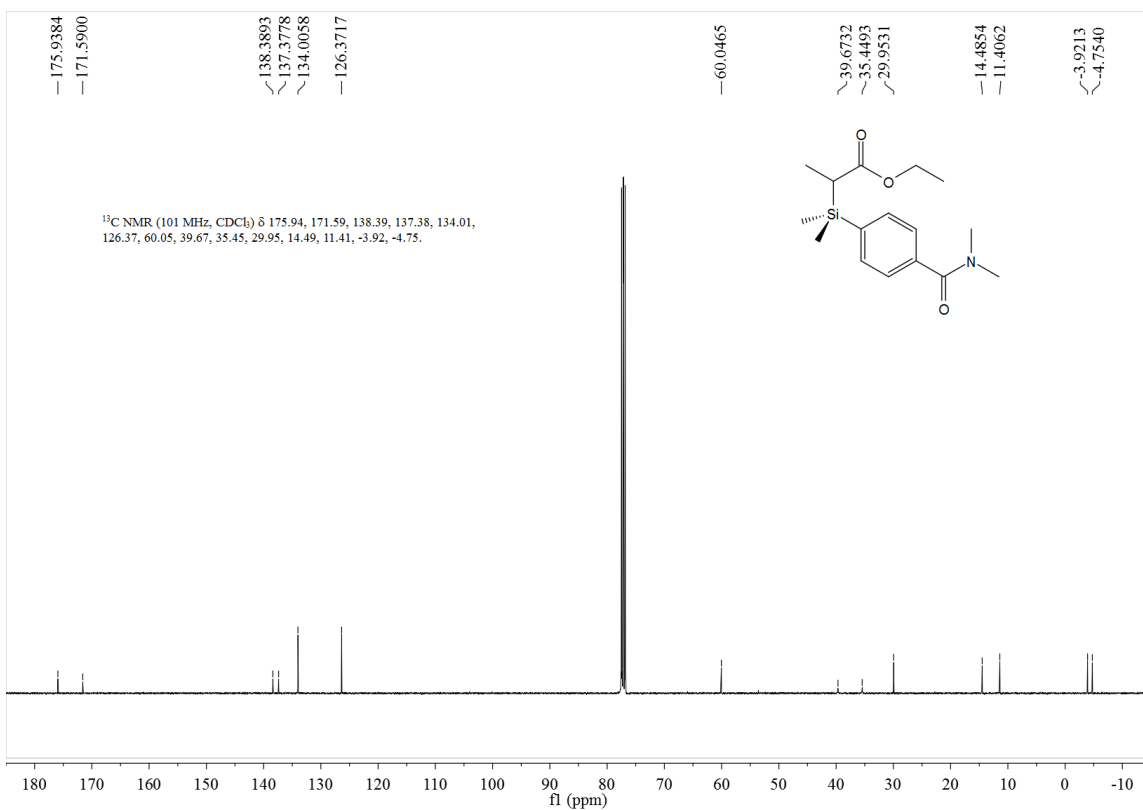

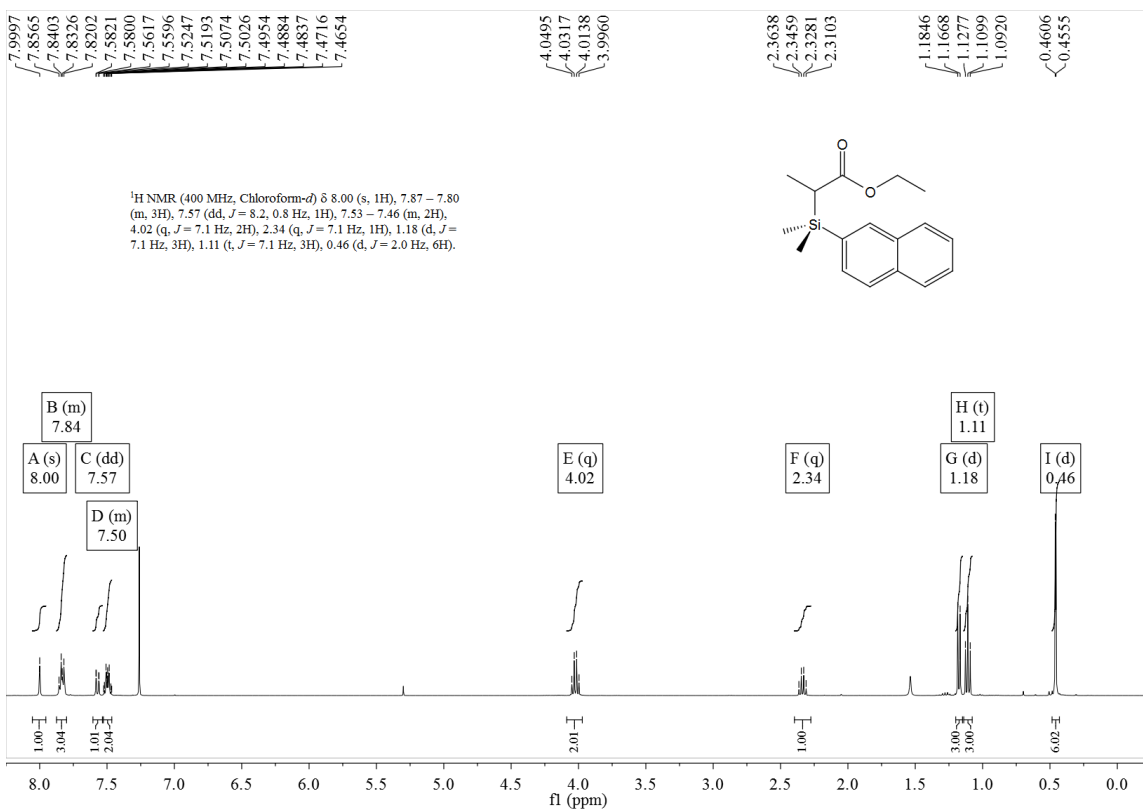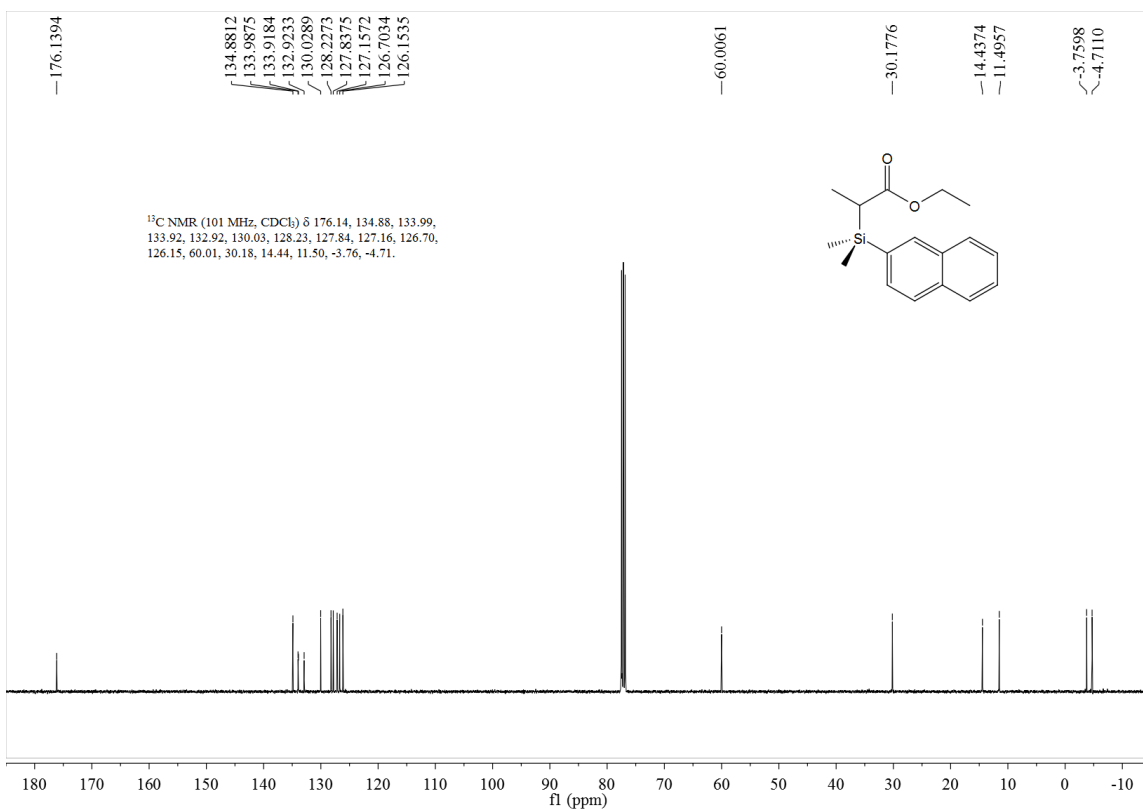

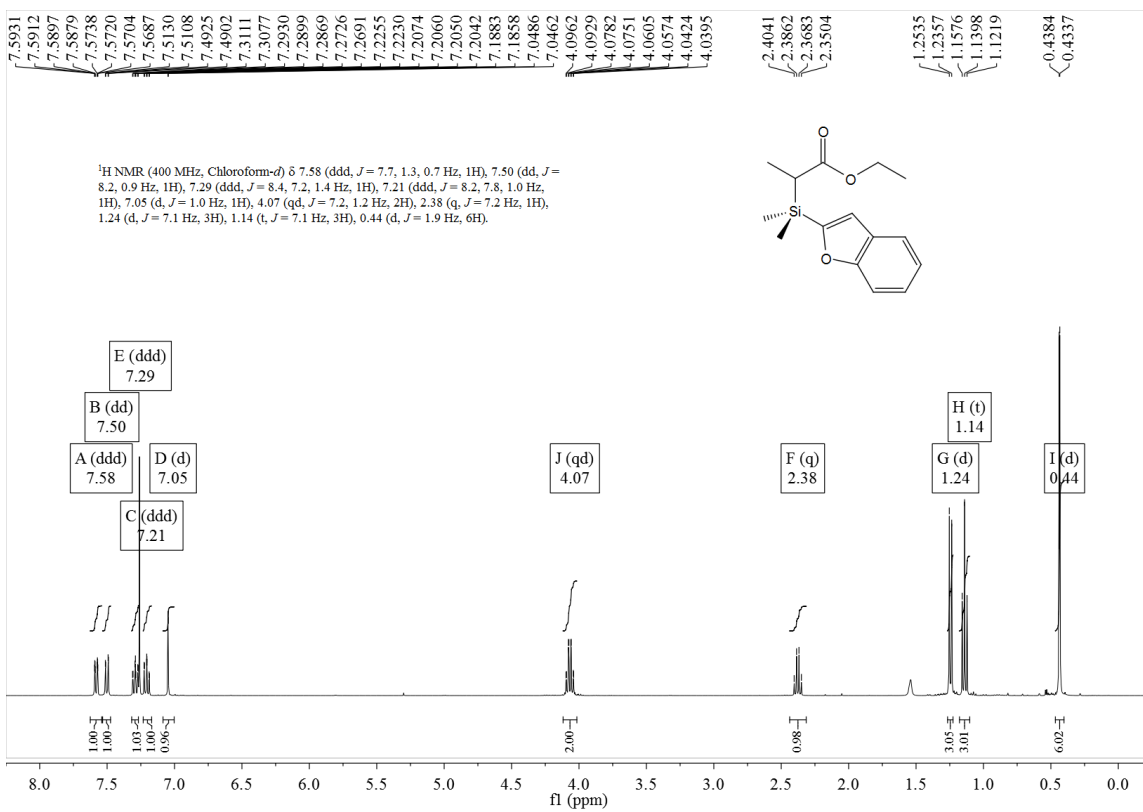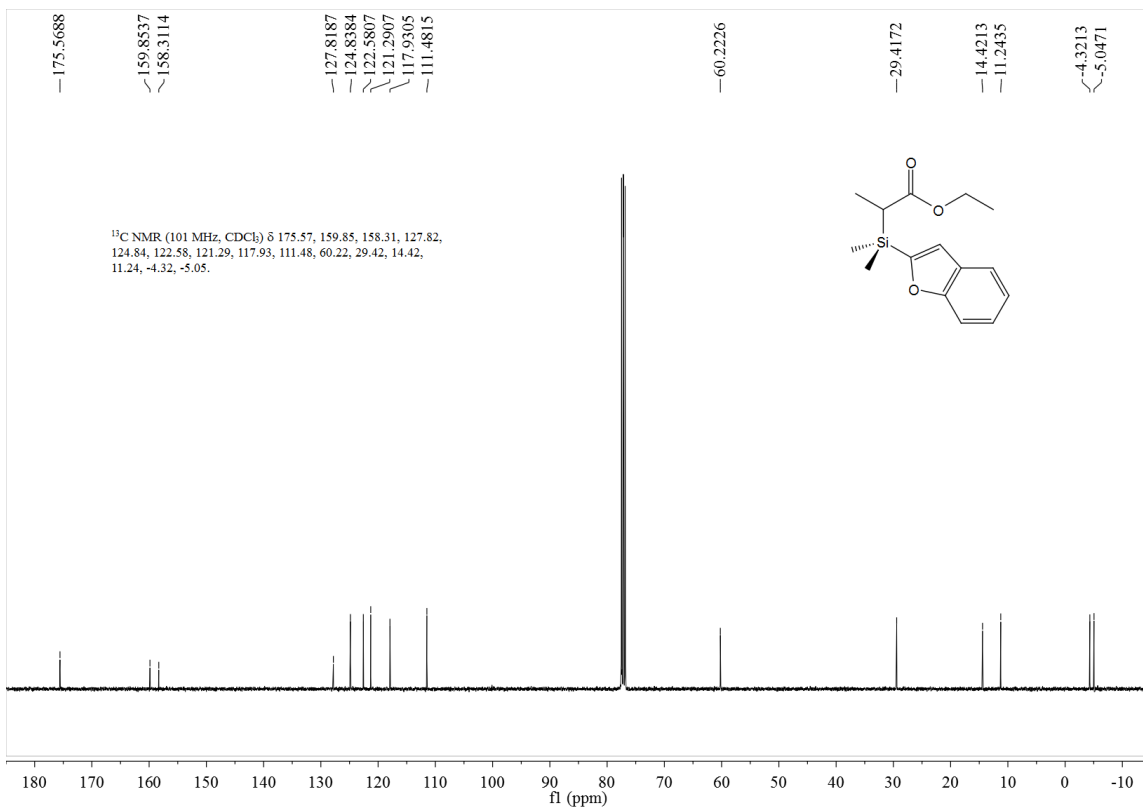



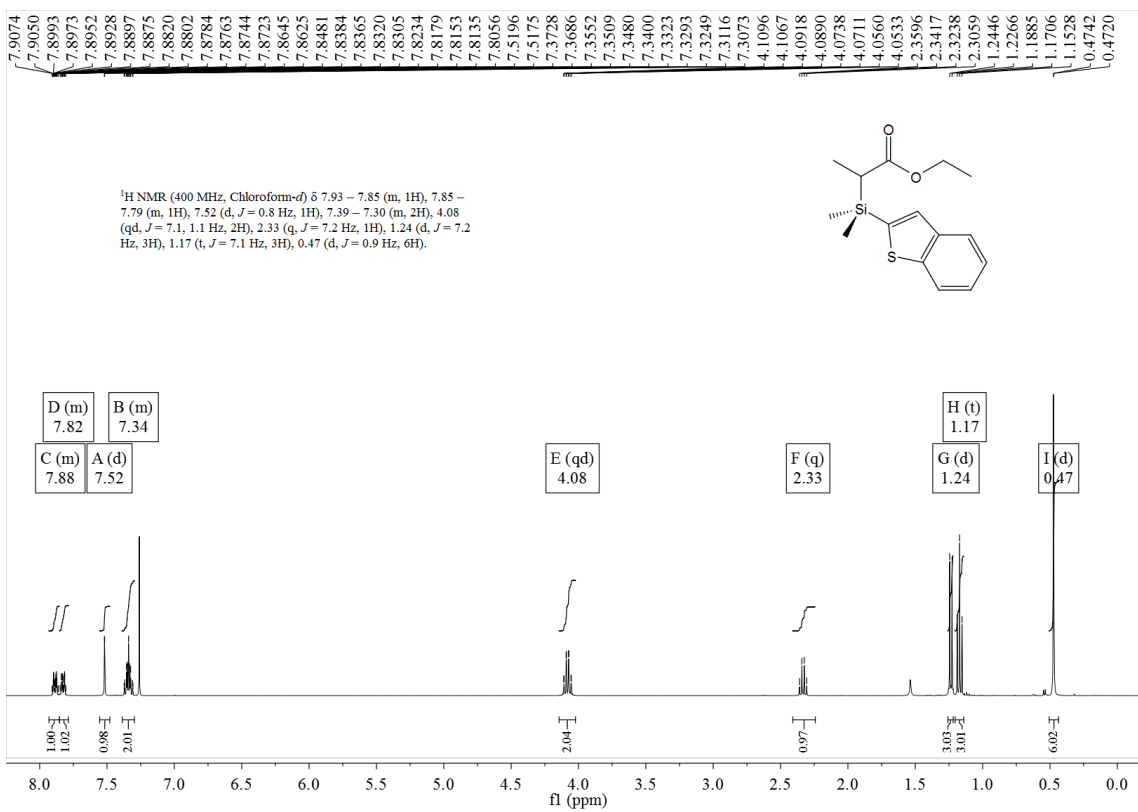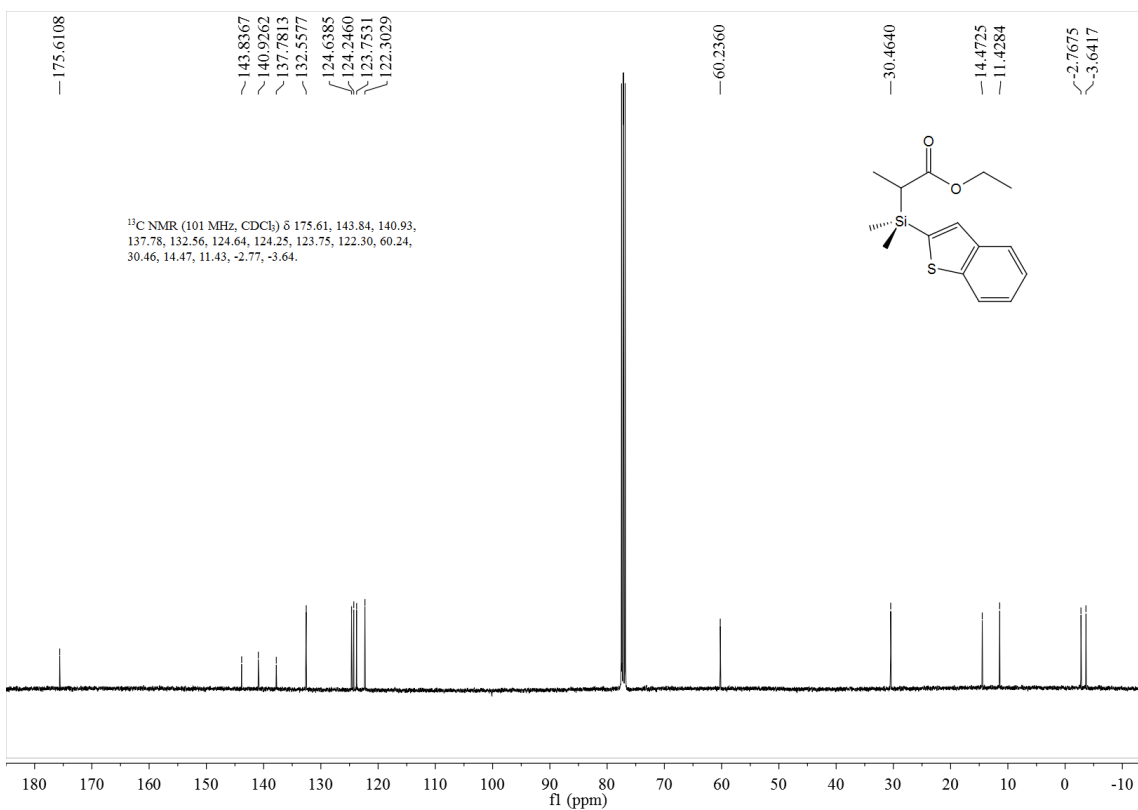

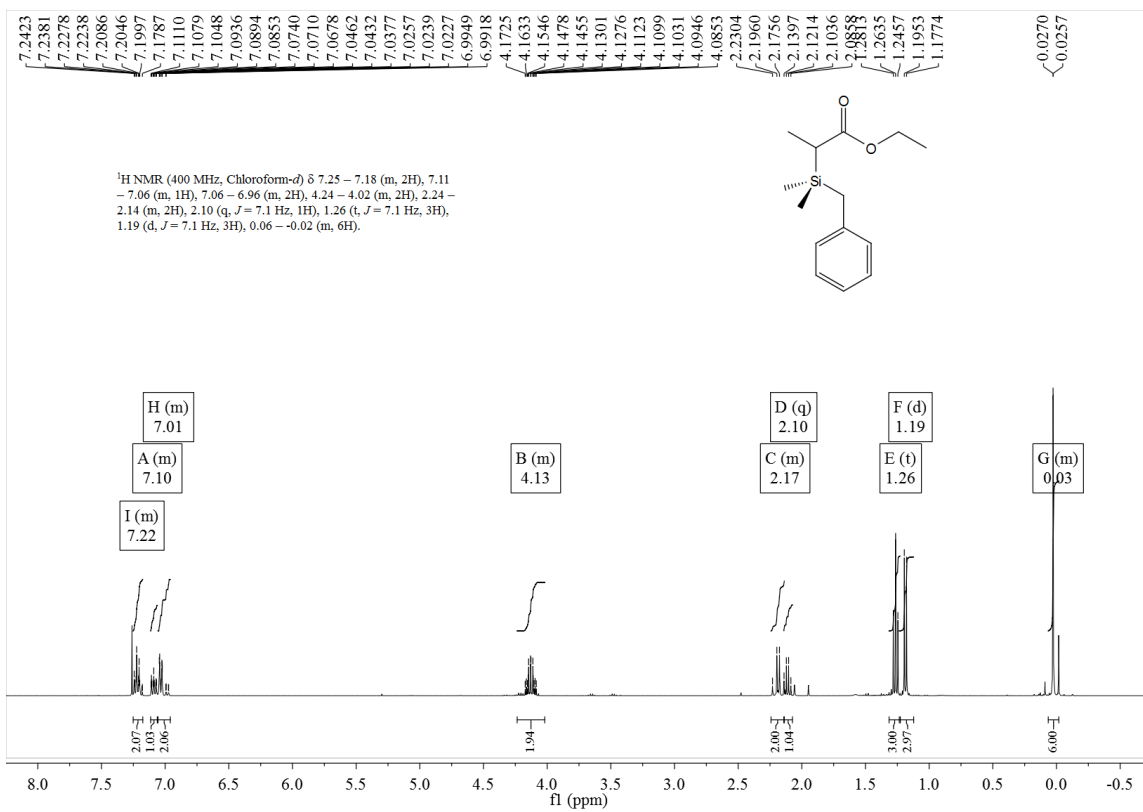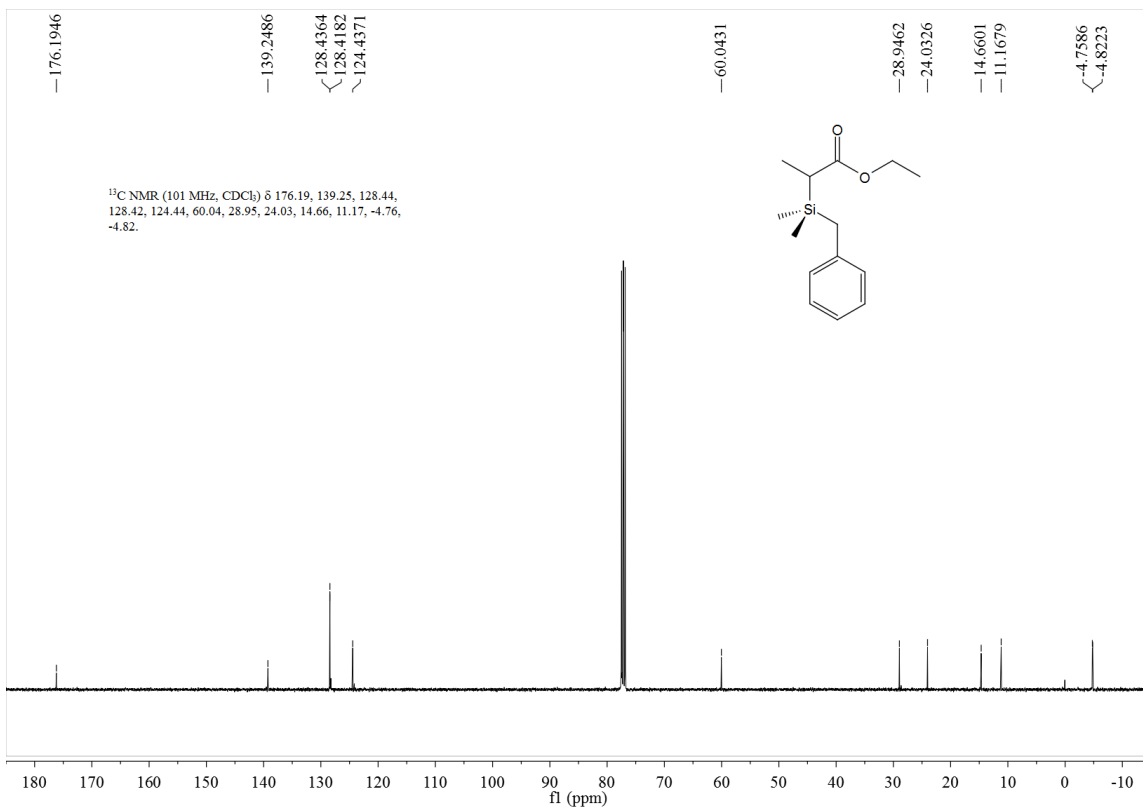

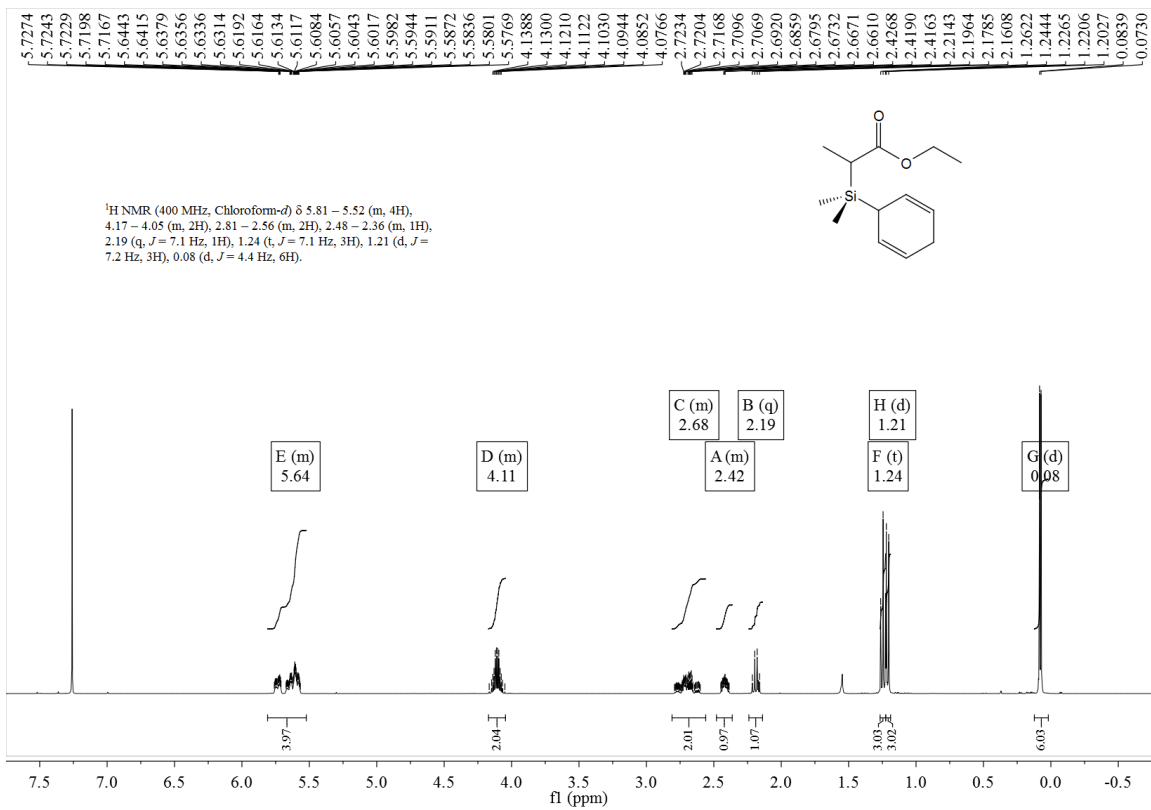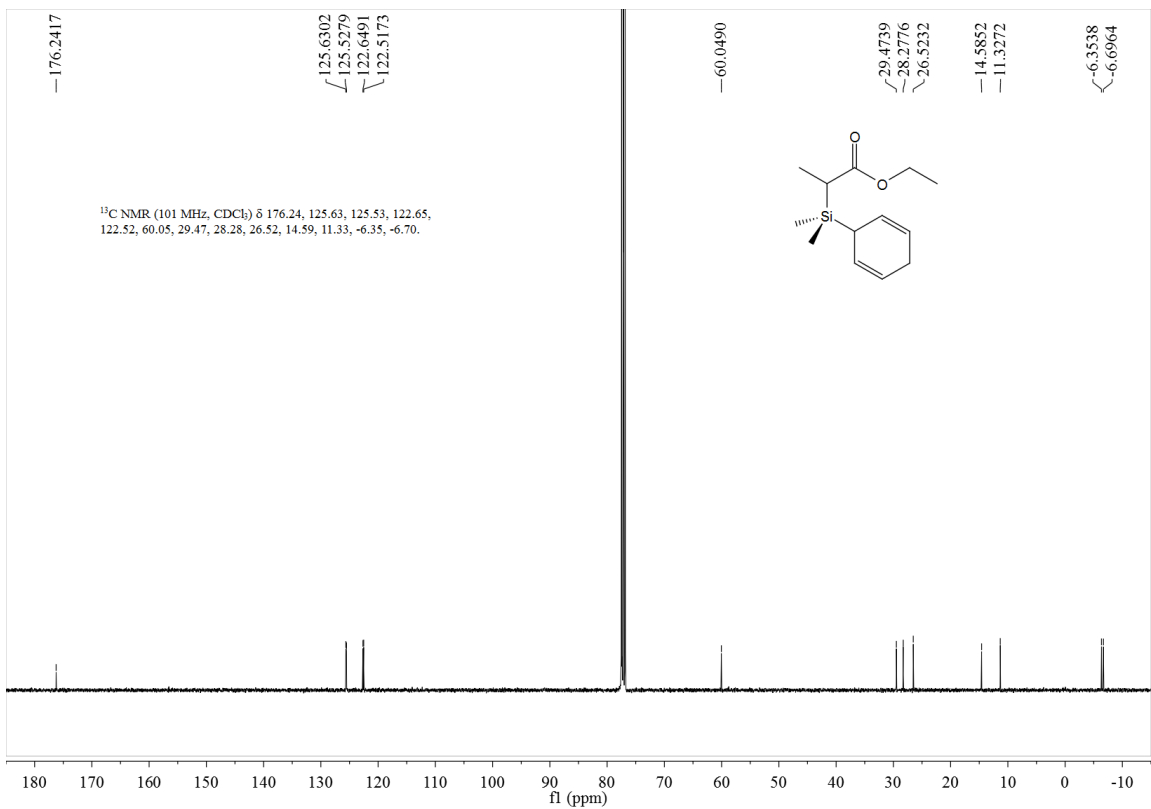

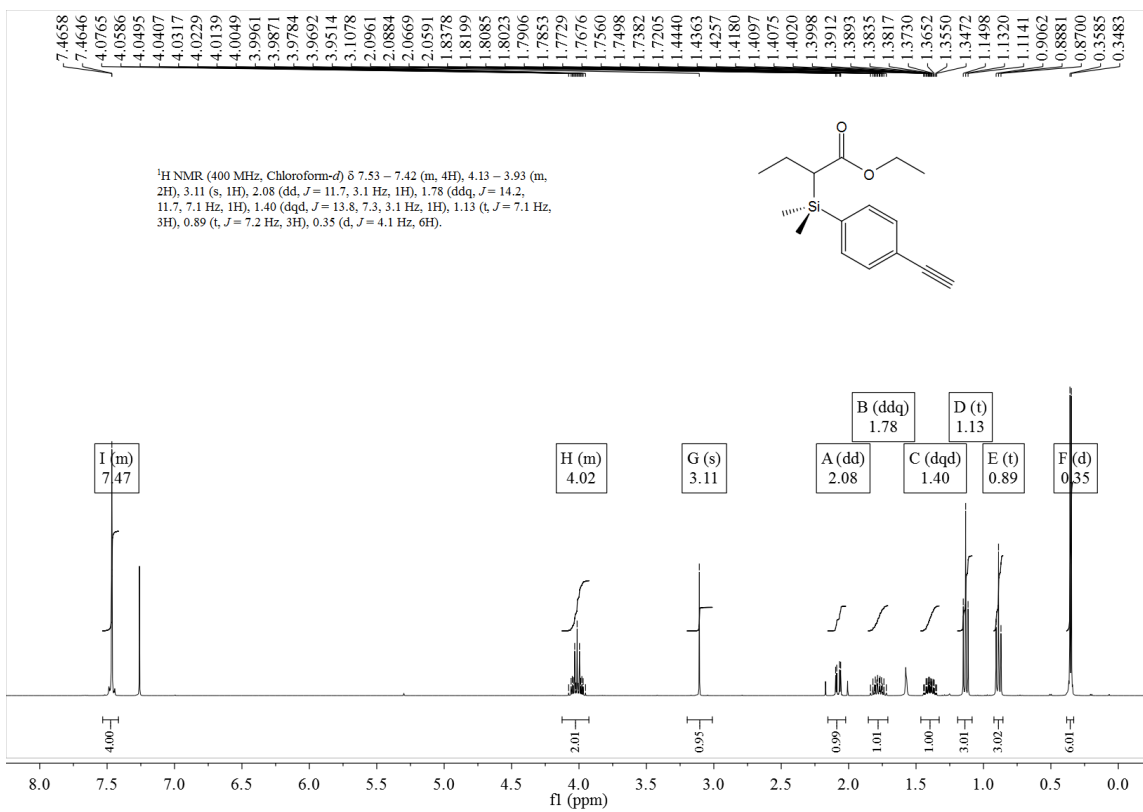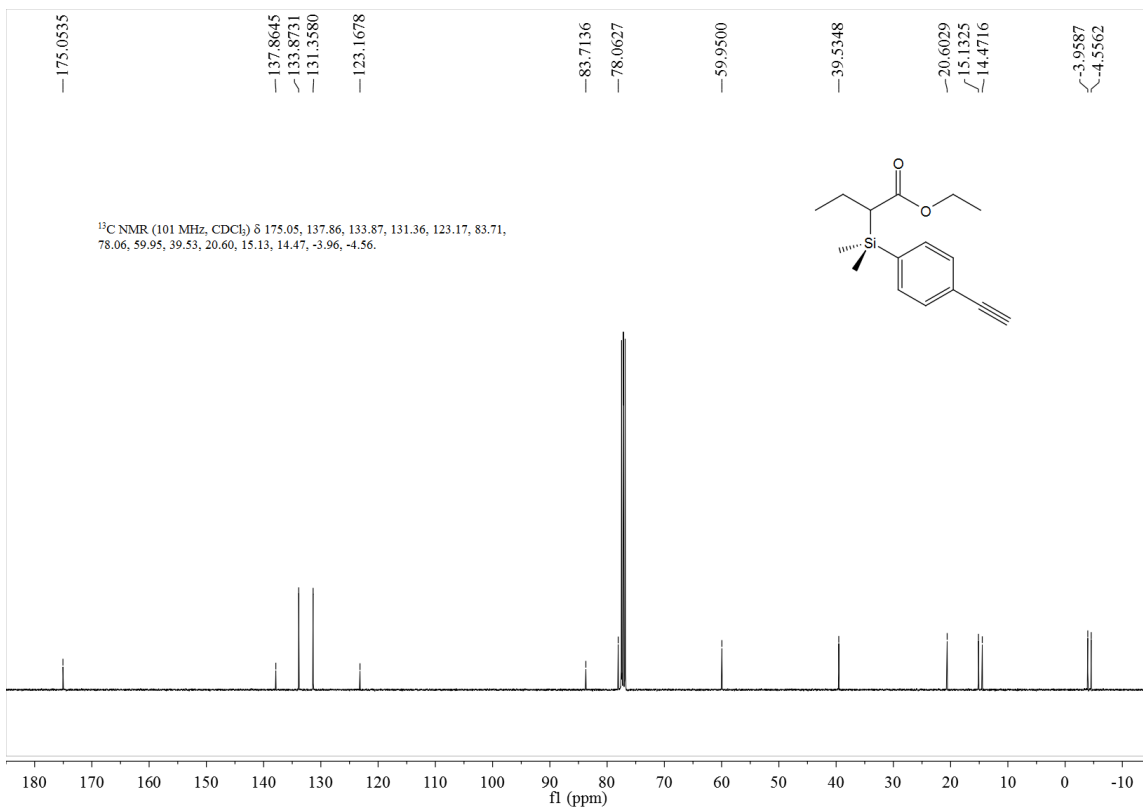

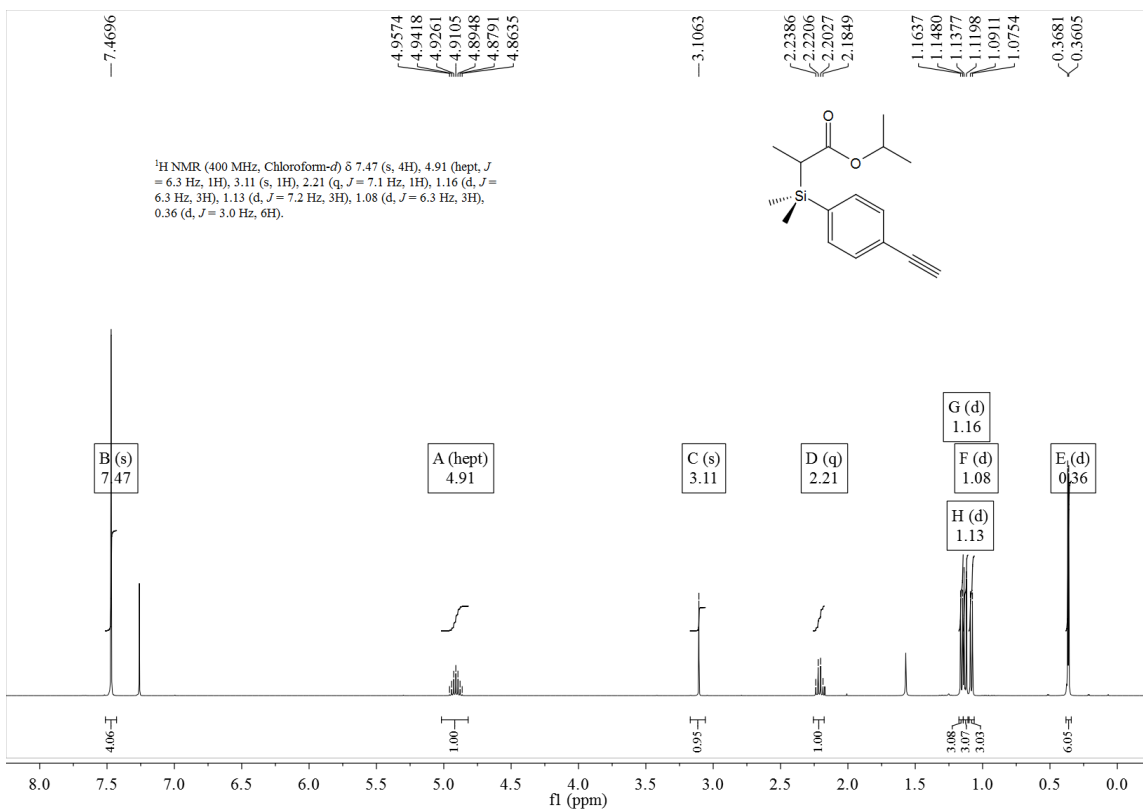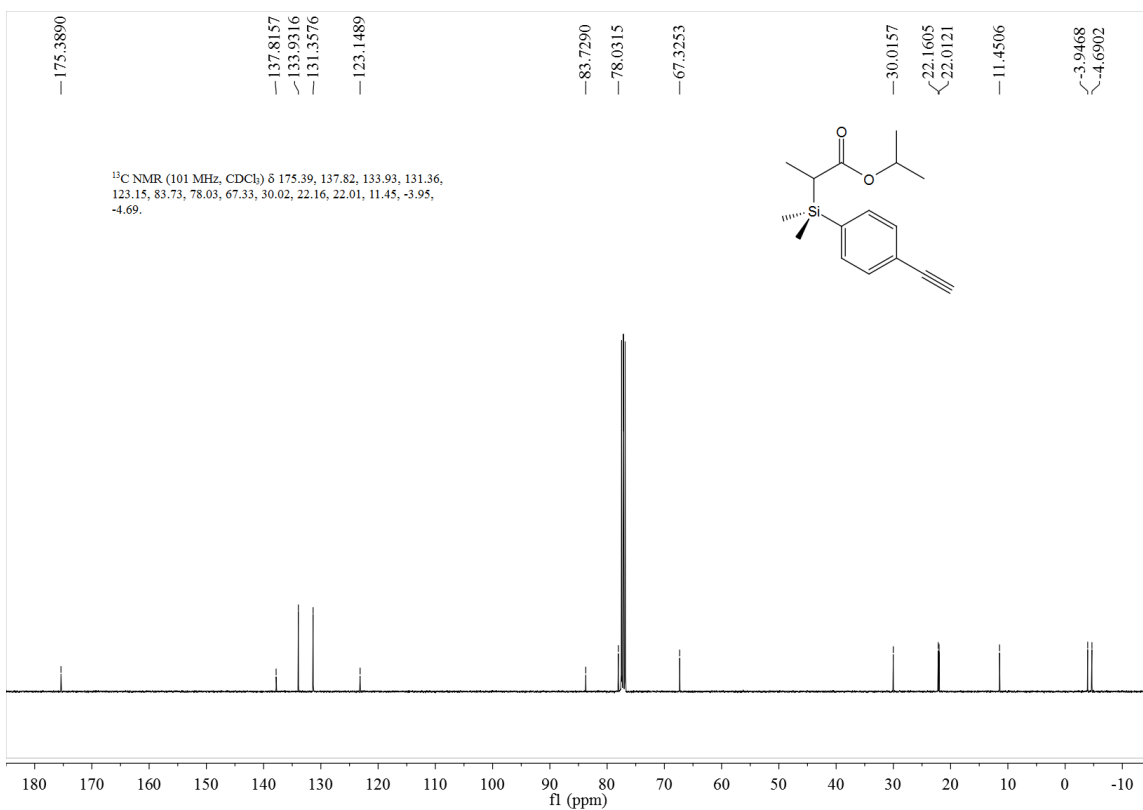



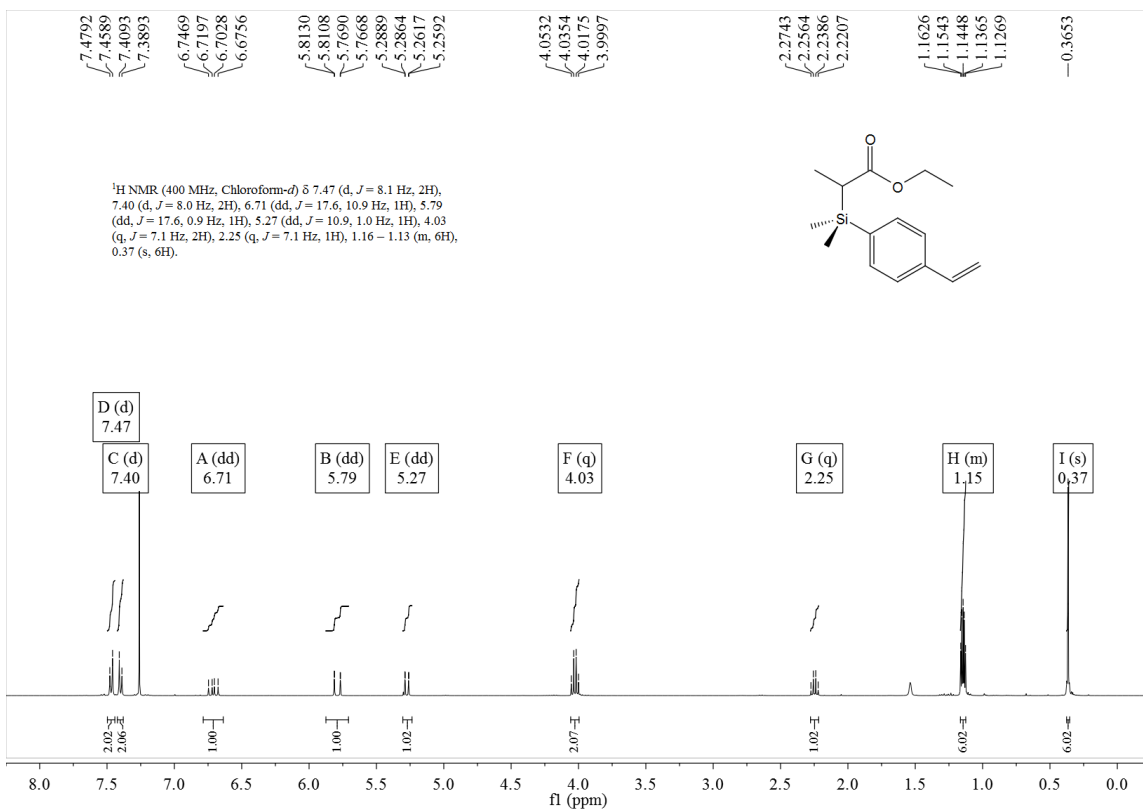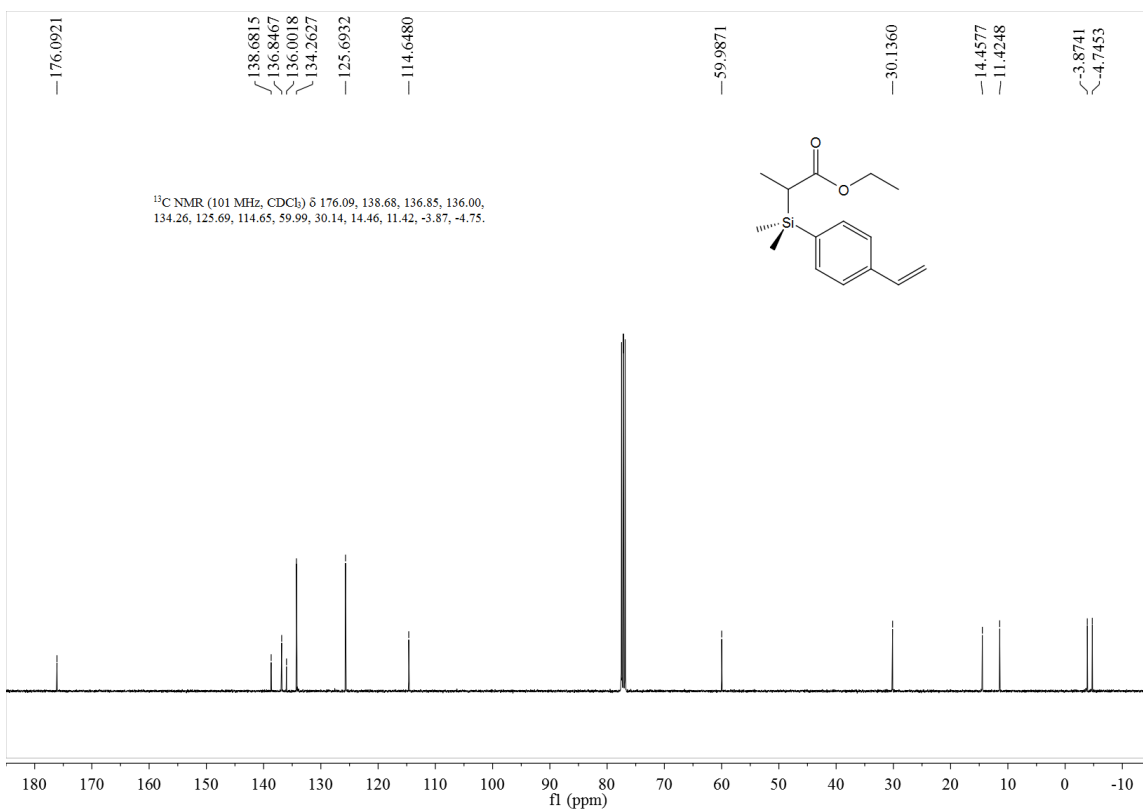

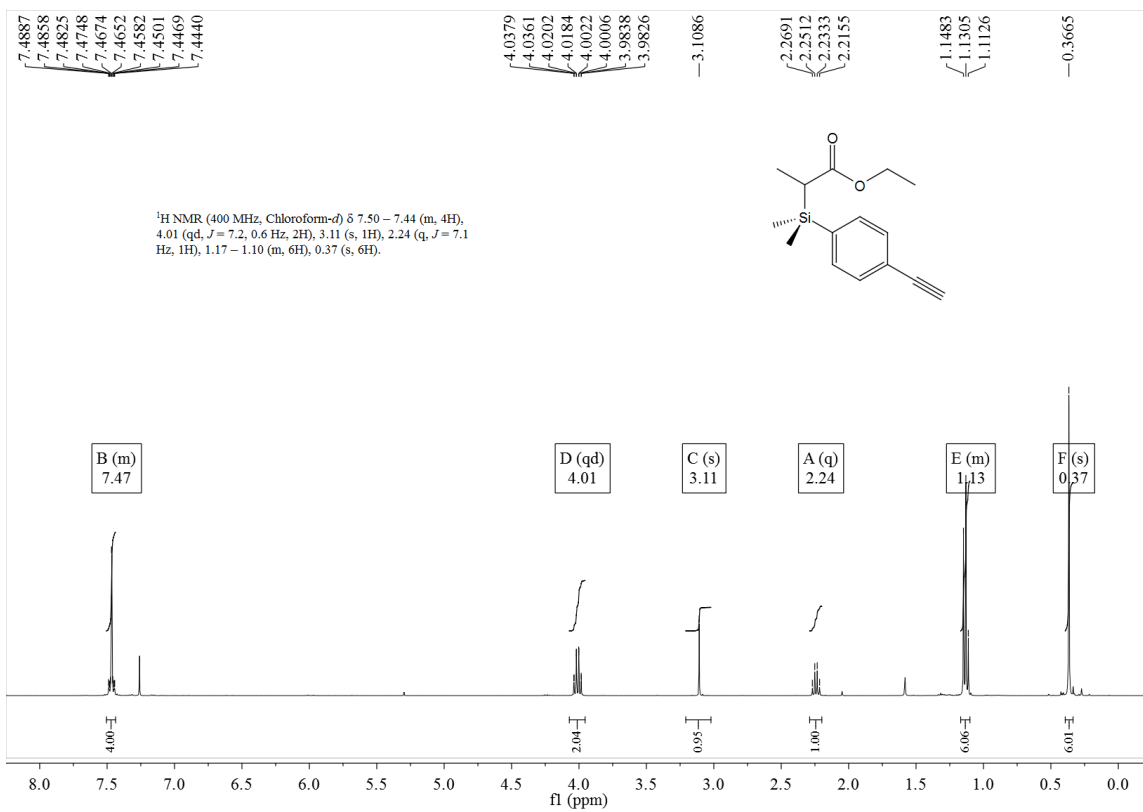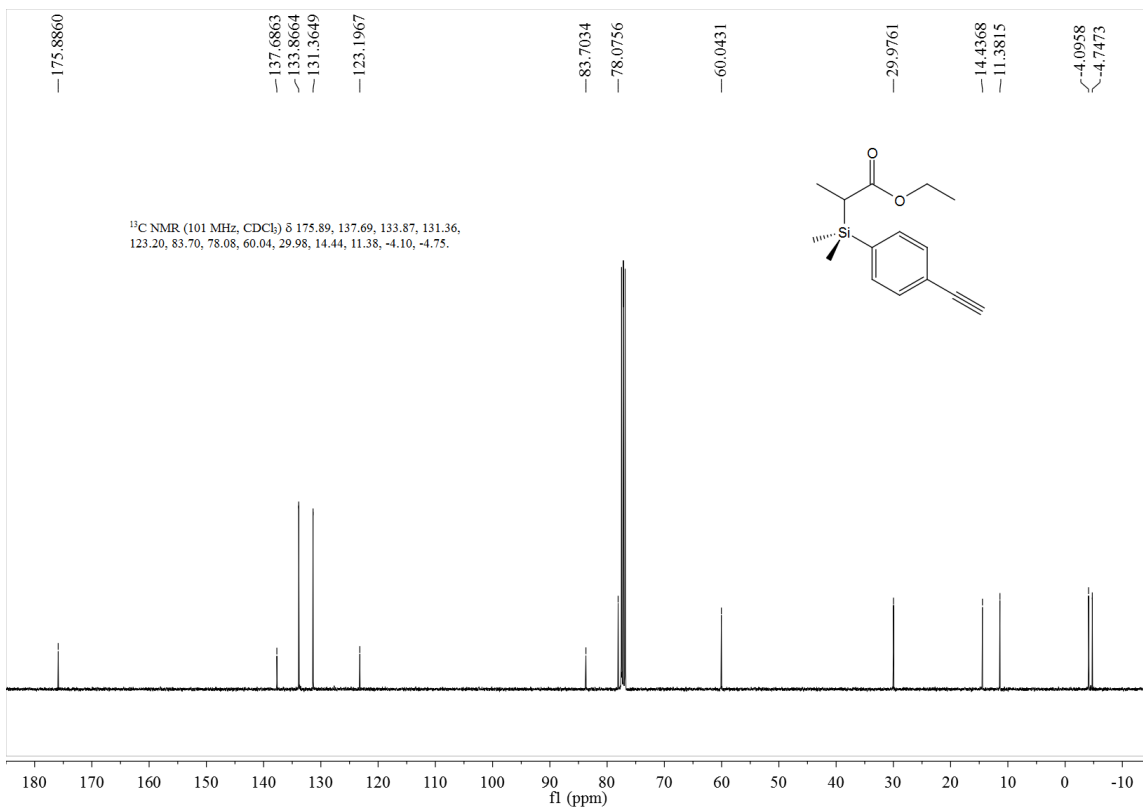



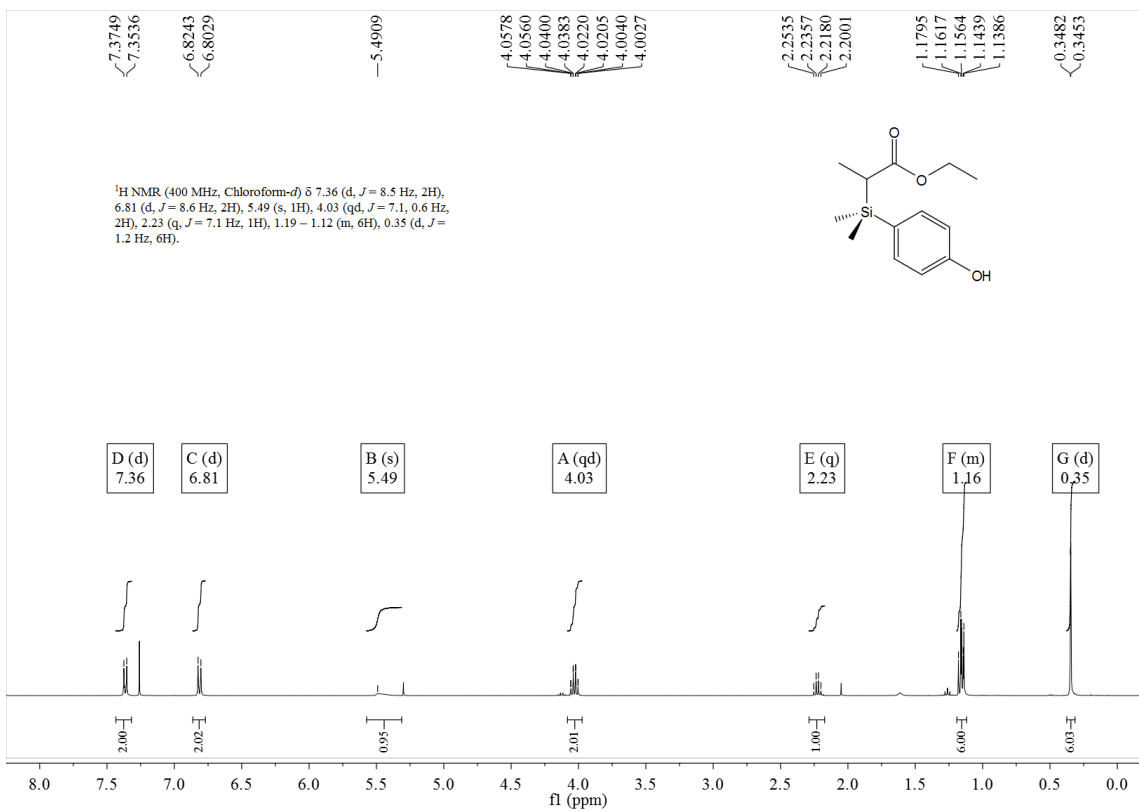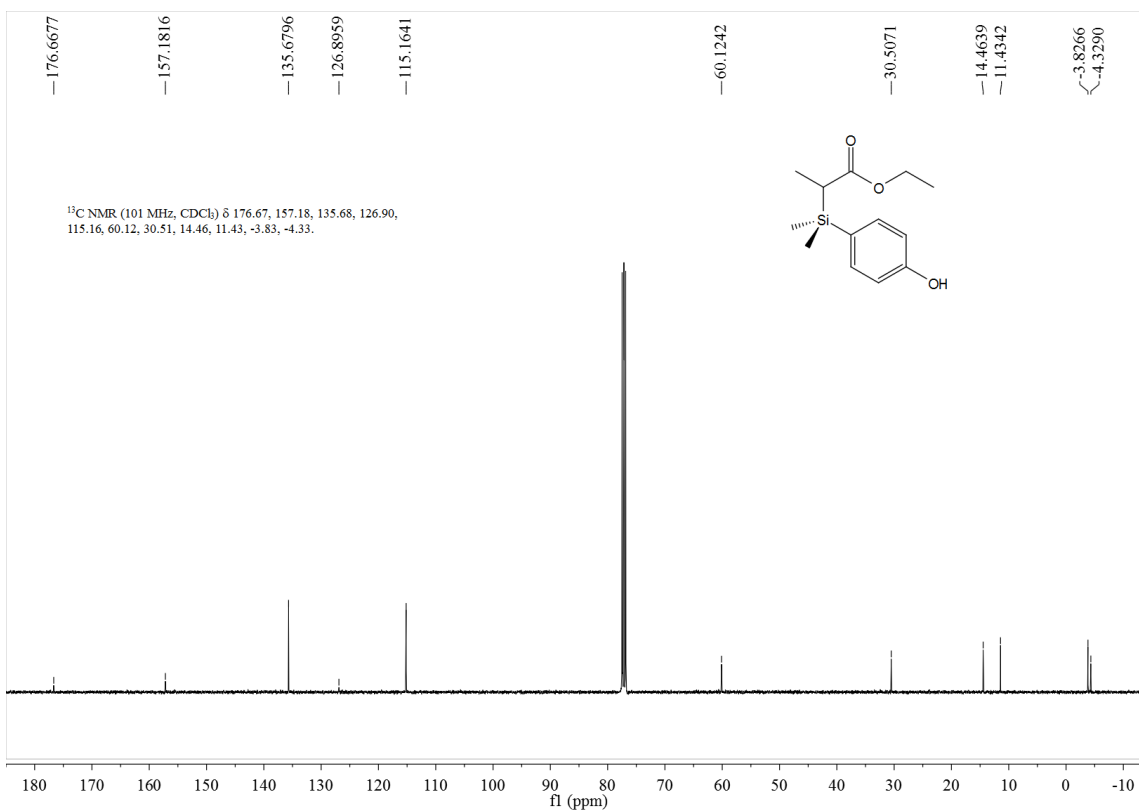

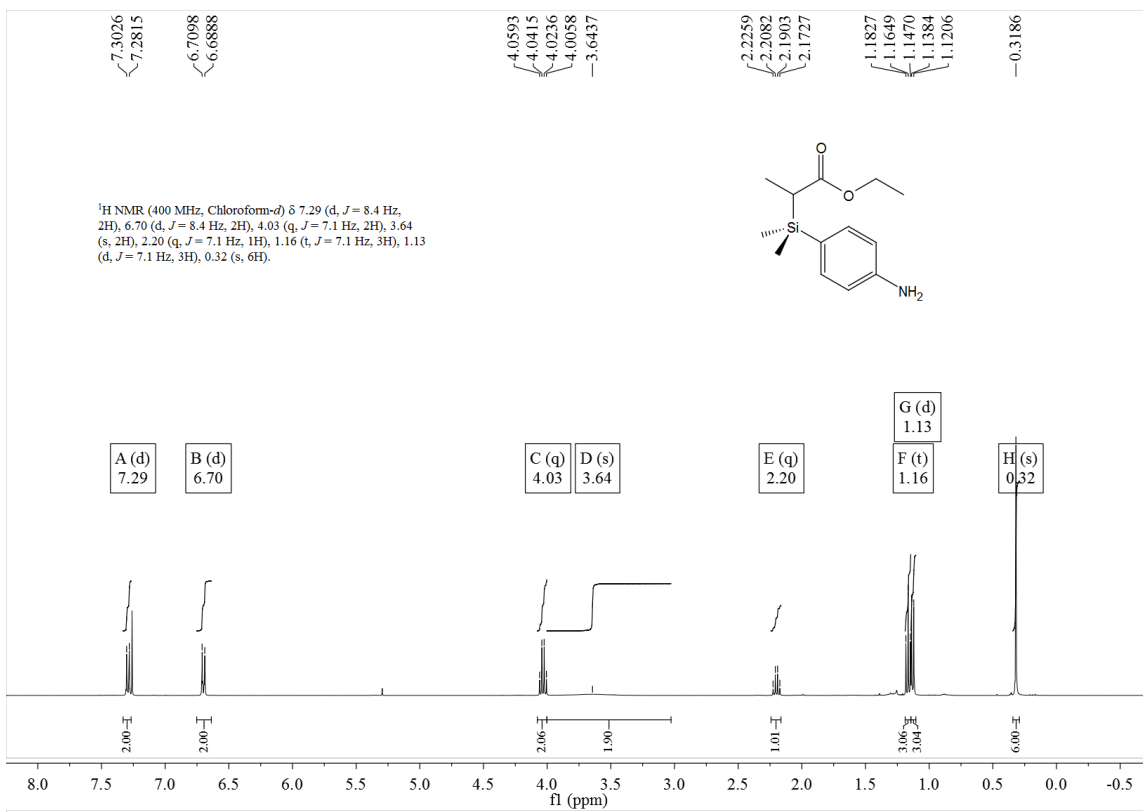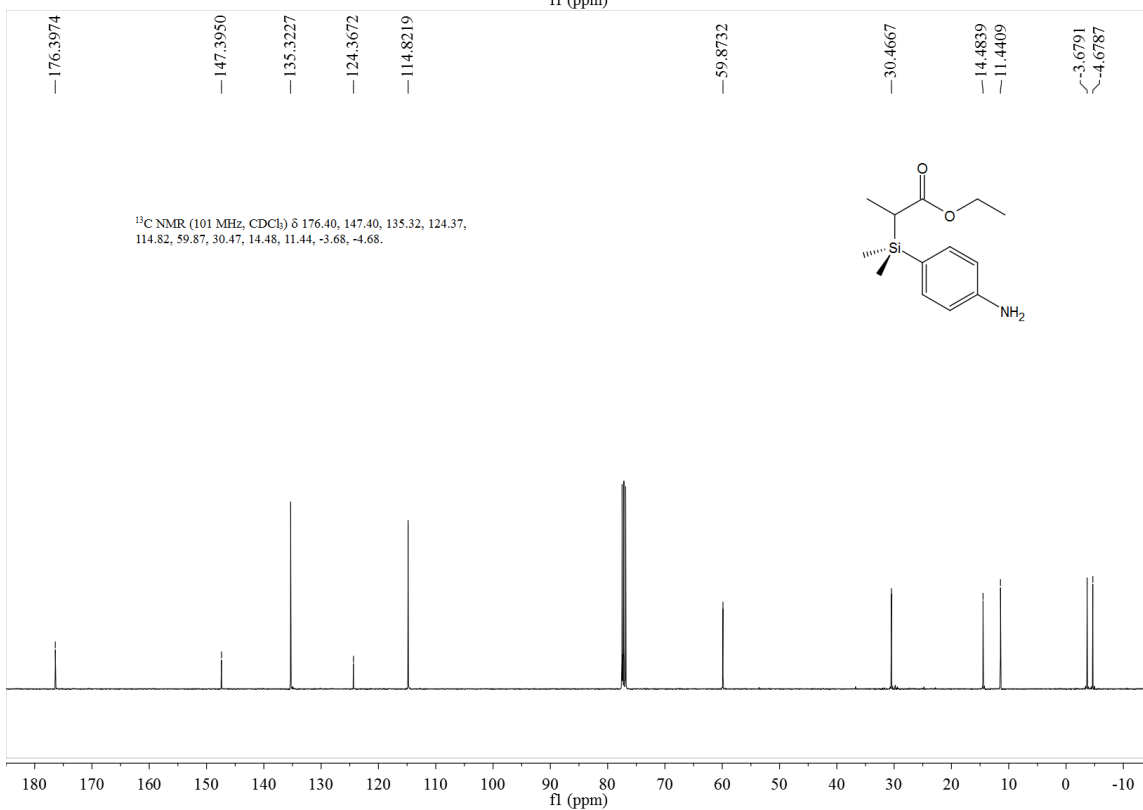

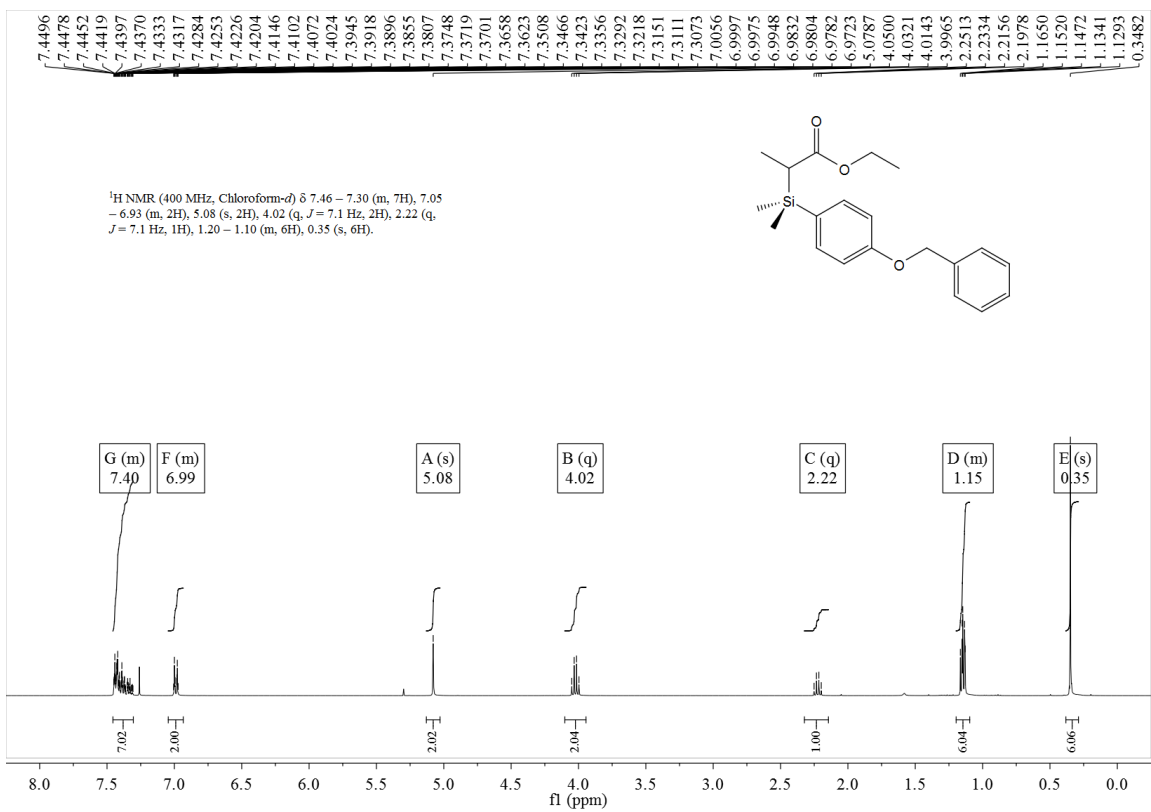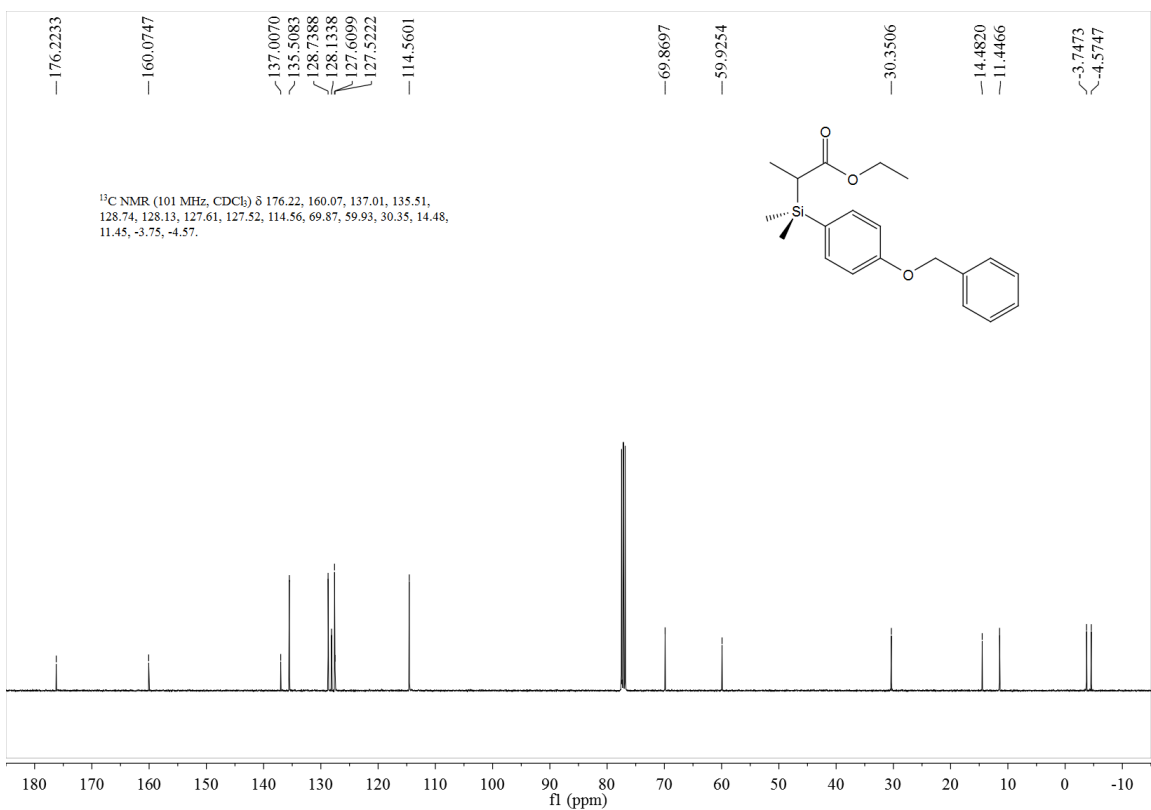

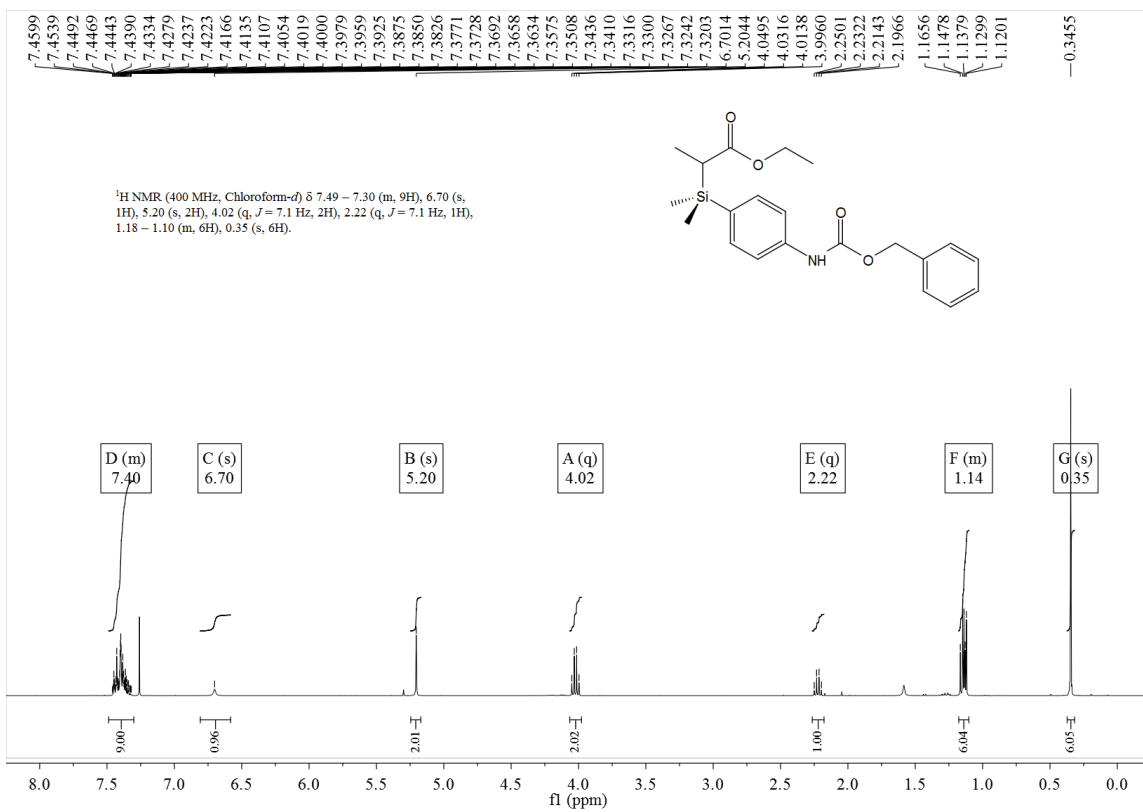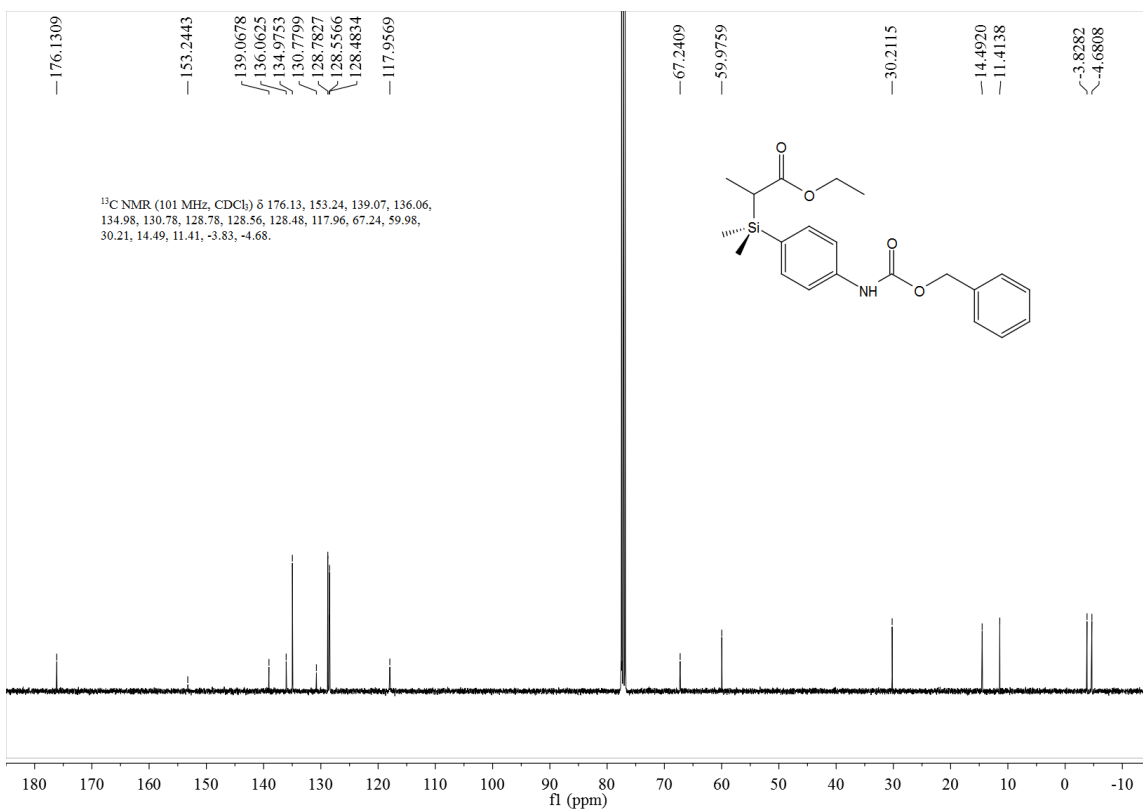

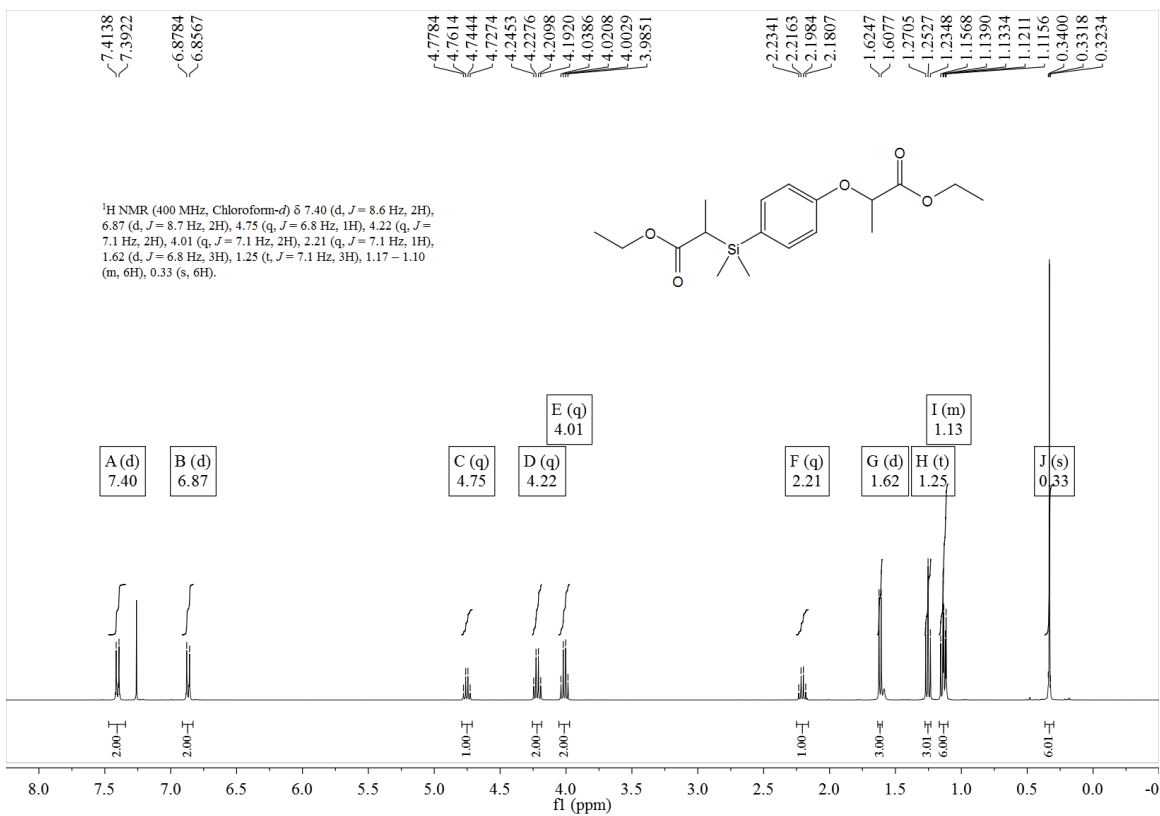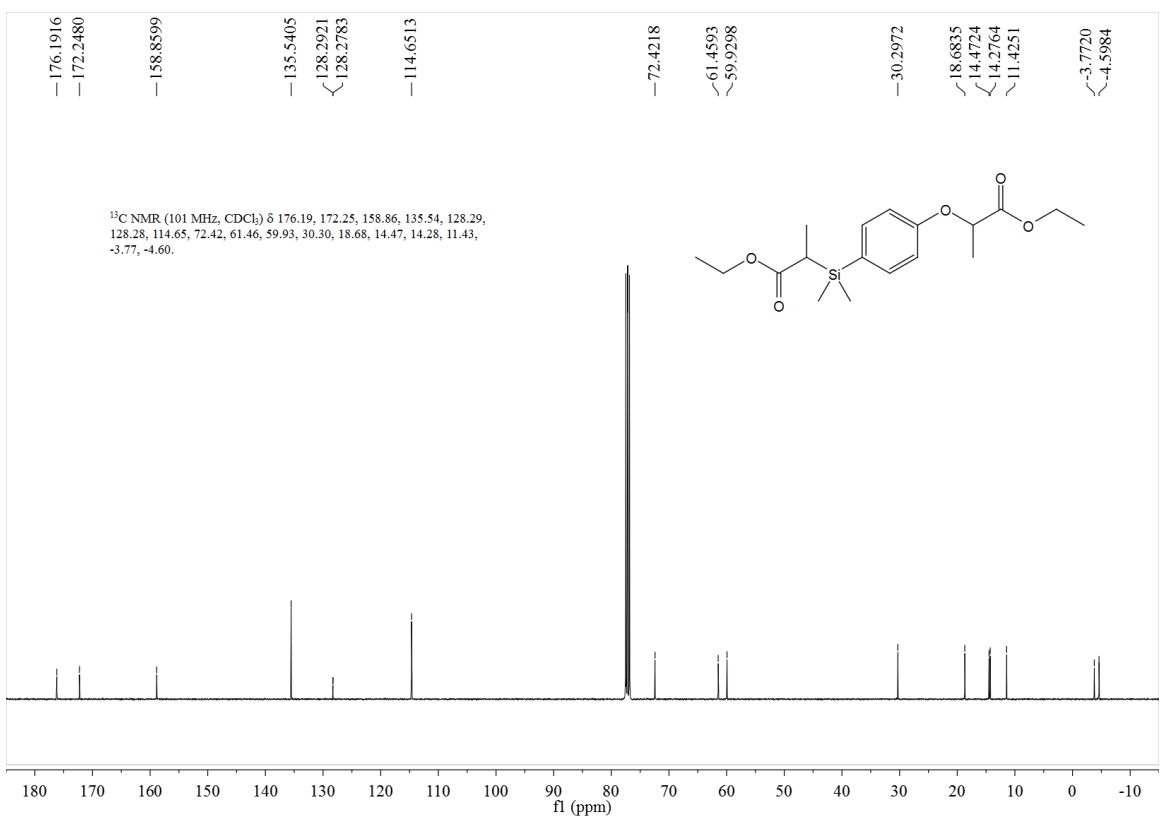

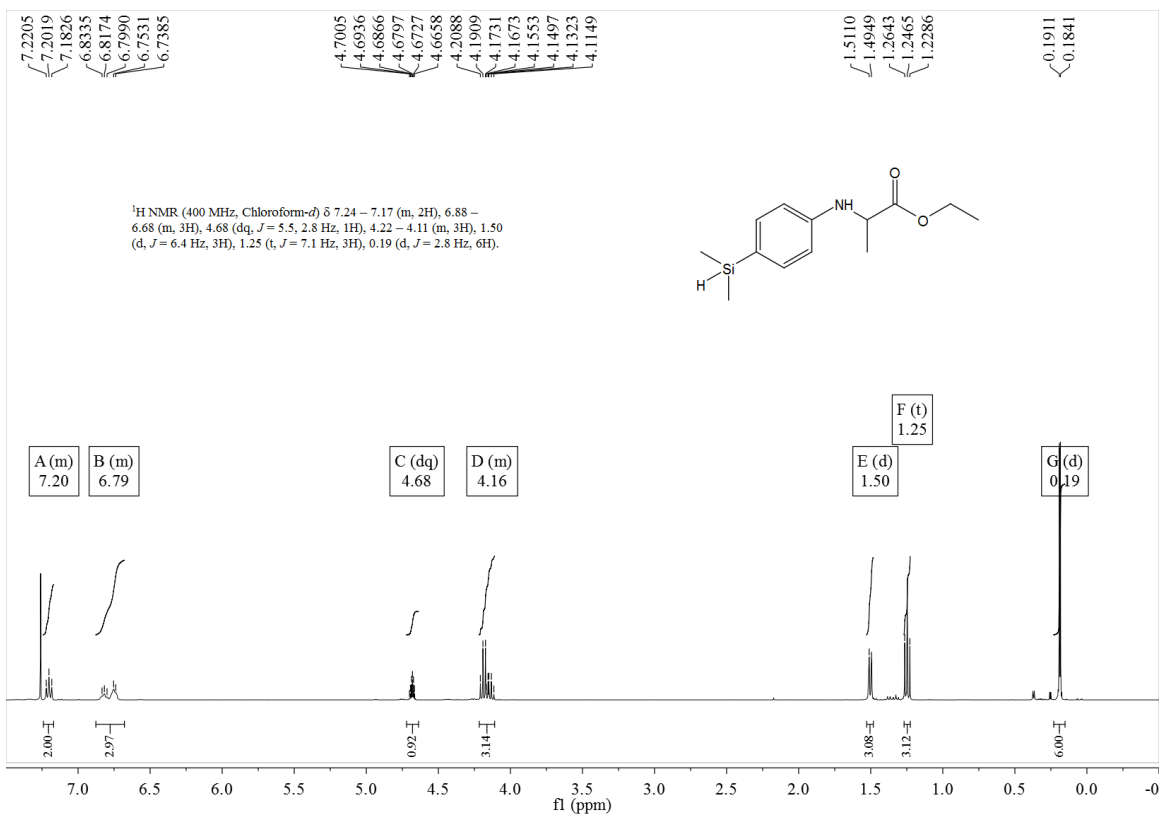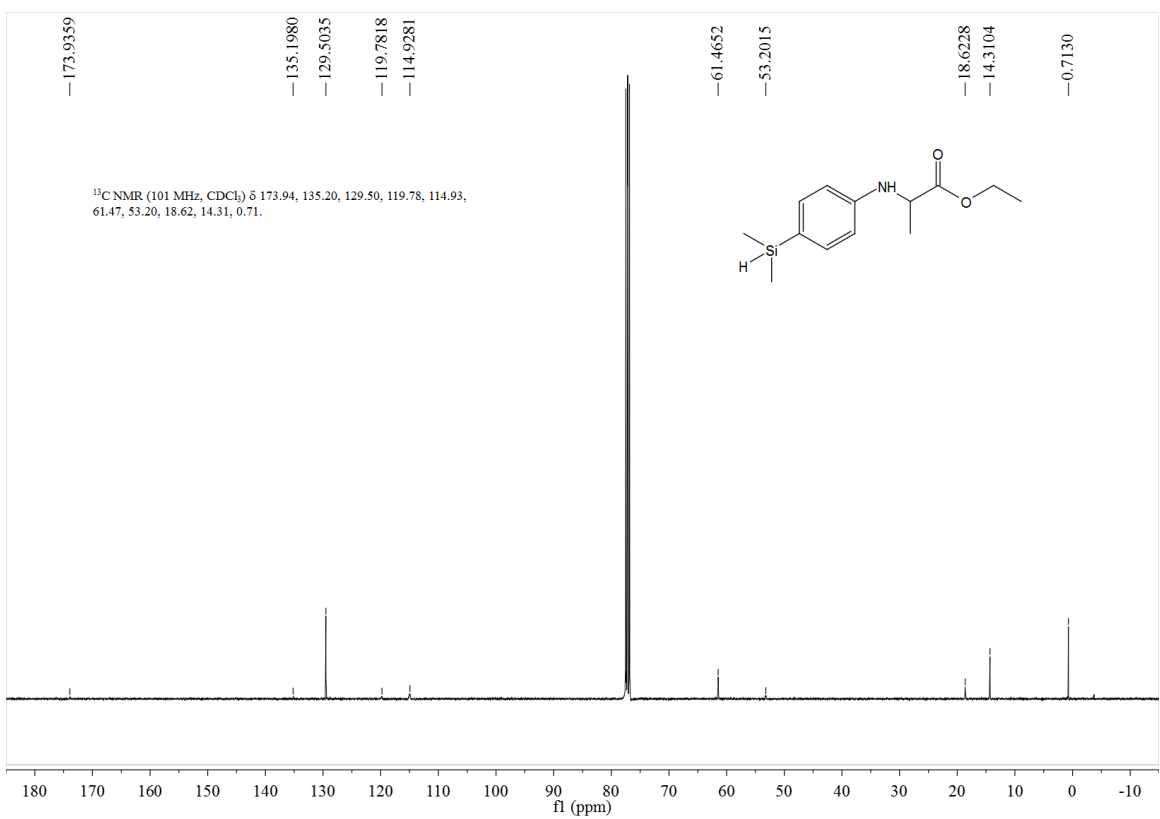

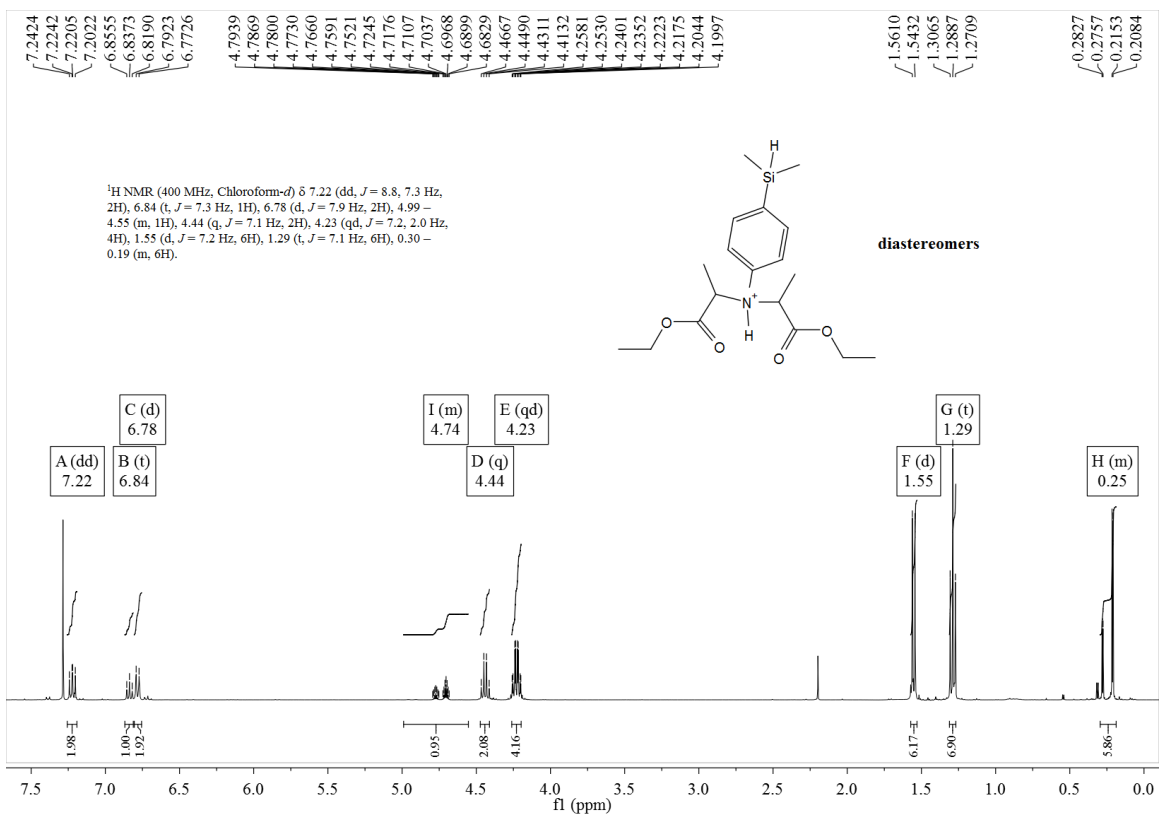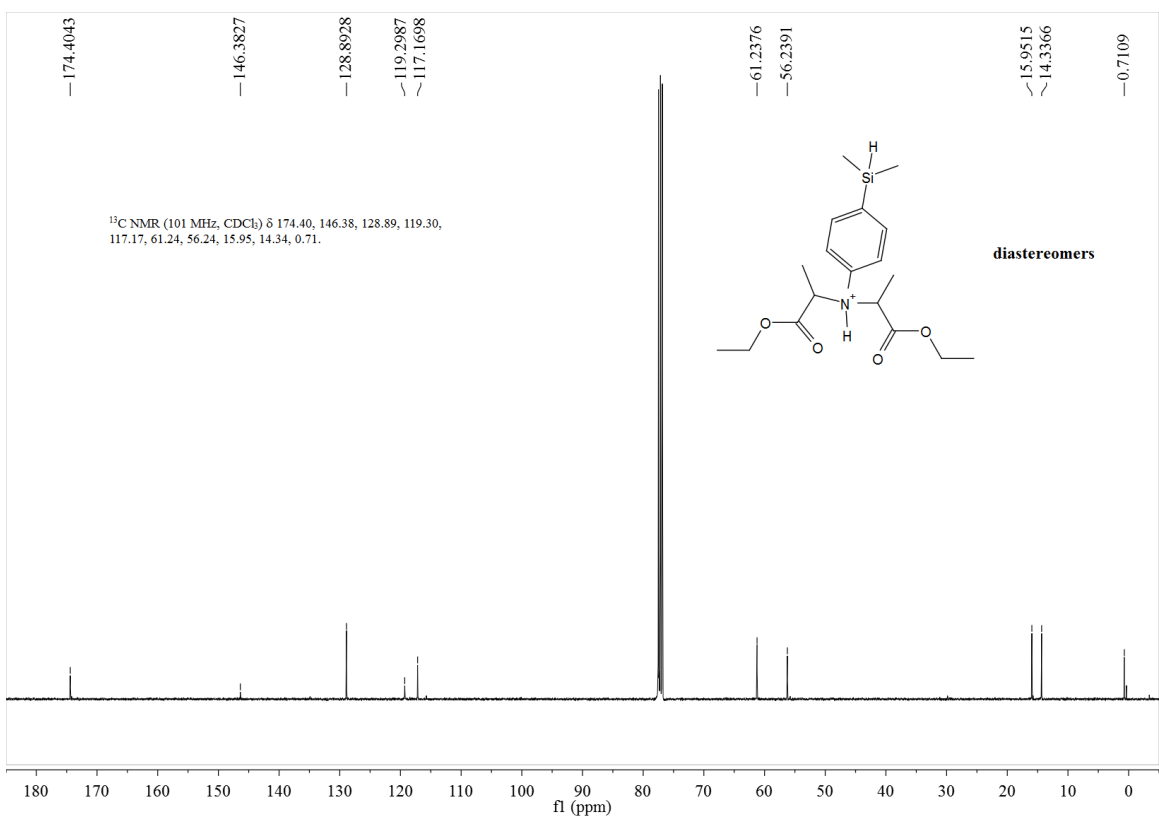

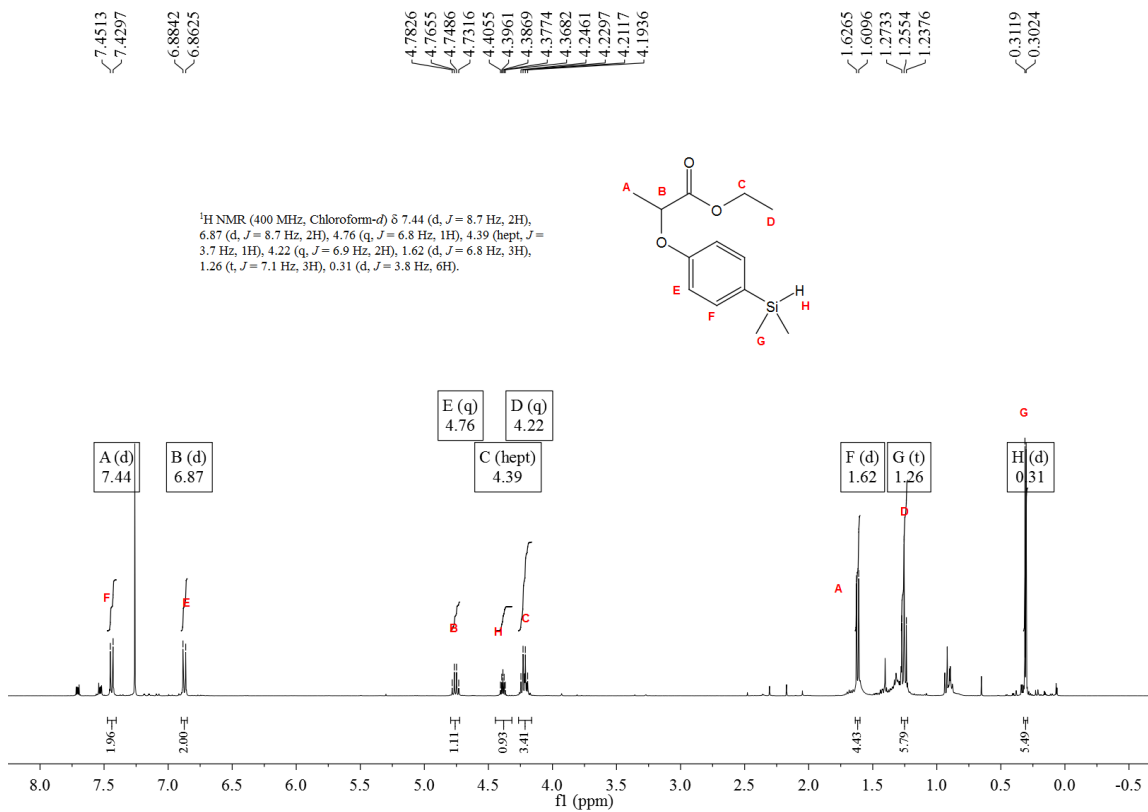



$^{29}\text{Si}$  NMR (79 Hz,  $\text{CDCl}_3$ ; referenced at  $\delta -78.9$  ppm using tetramethoxysilane as internal standard. This internal standard contained a small amount of impurity, which appeared at  $\delta -86.3$  ppm.)

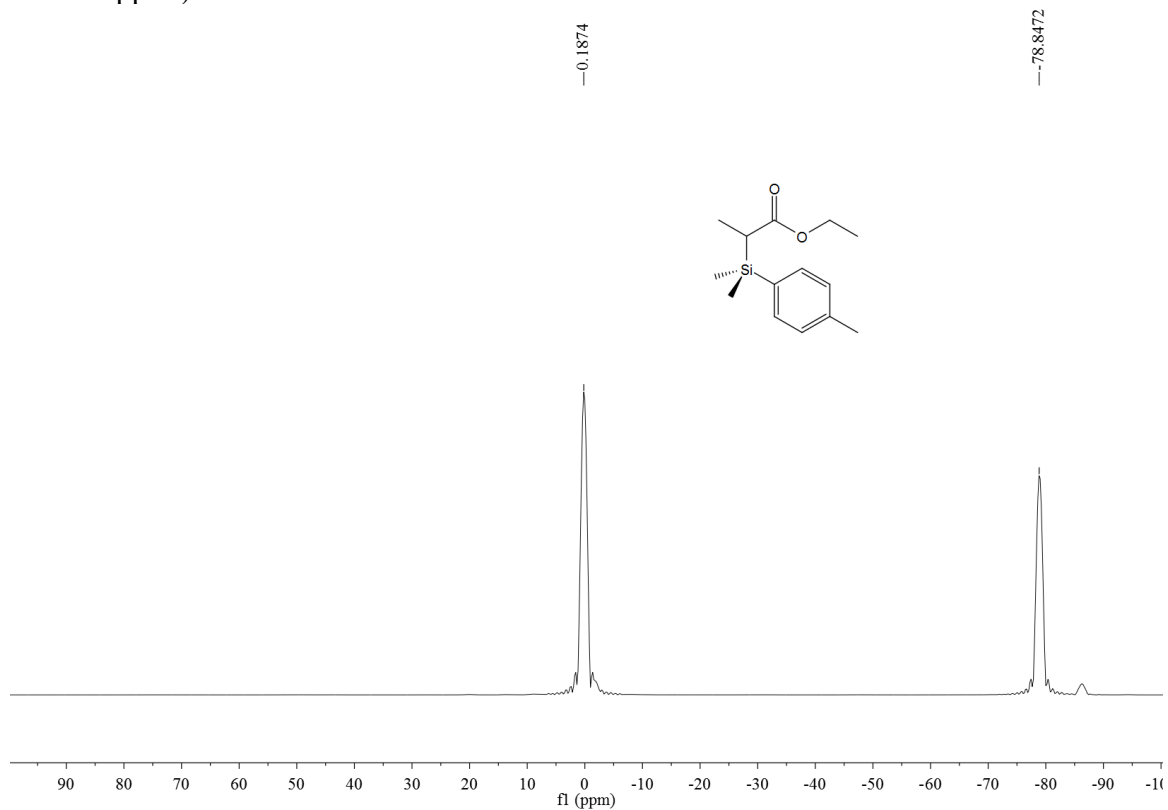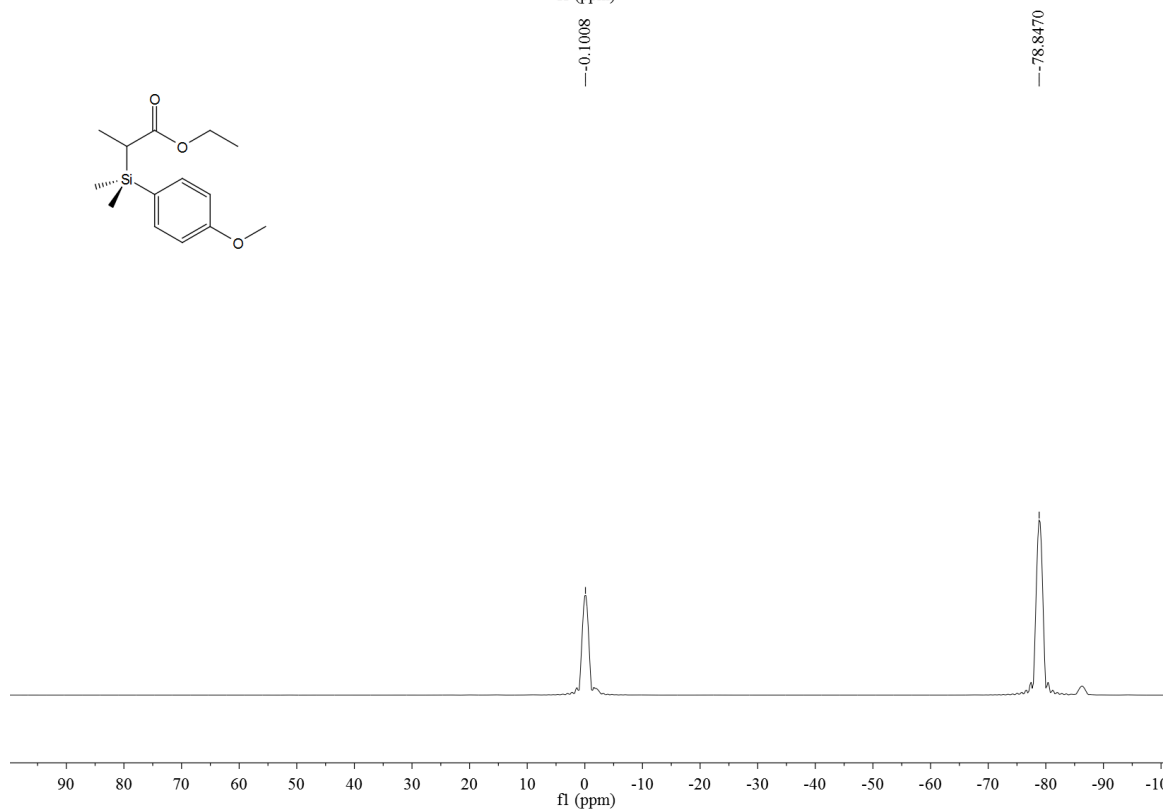

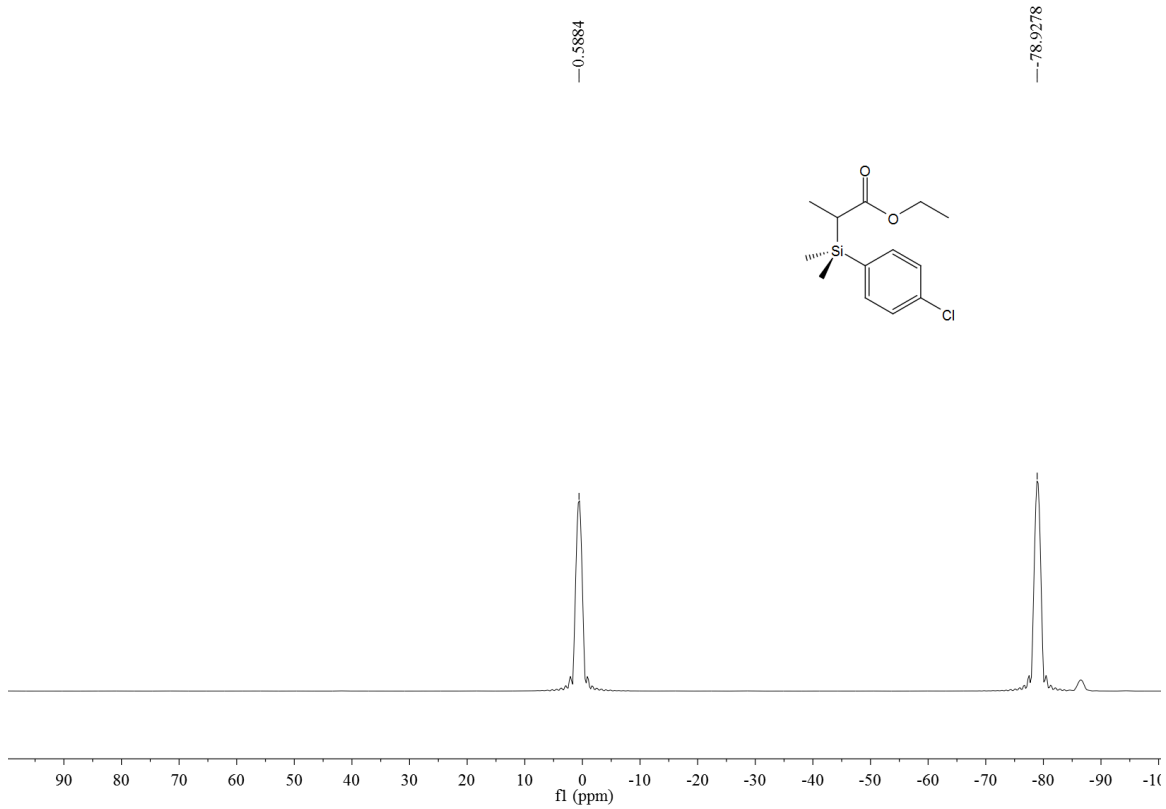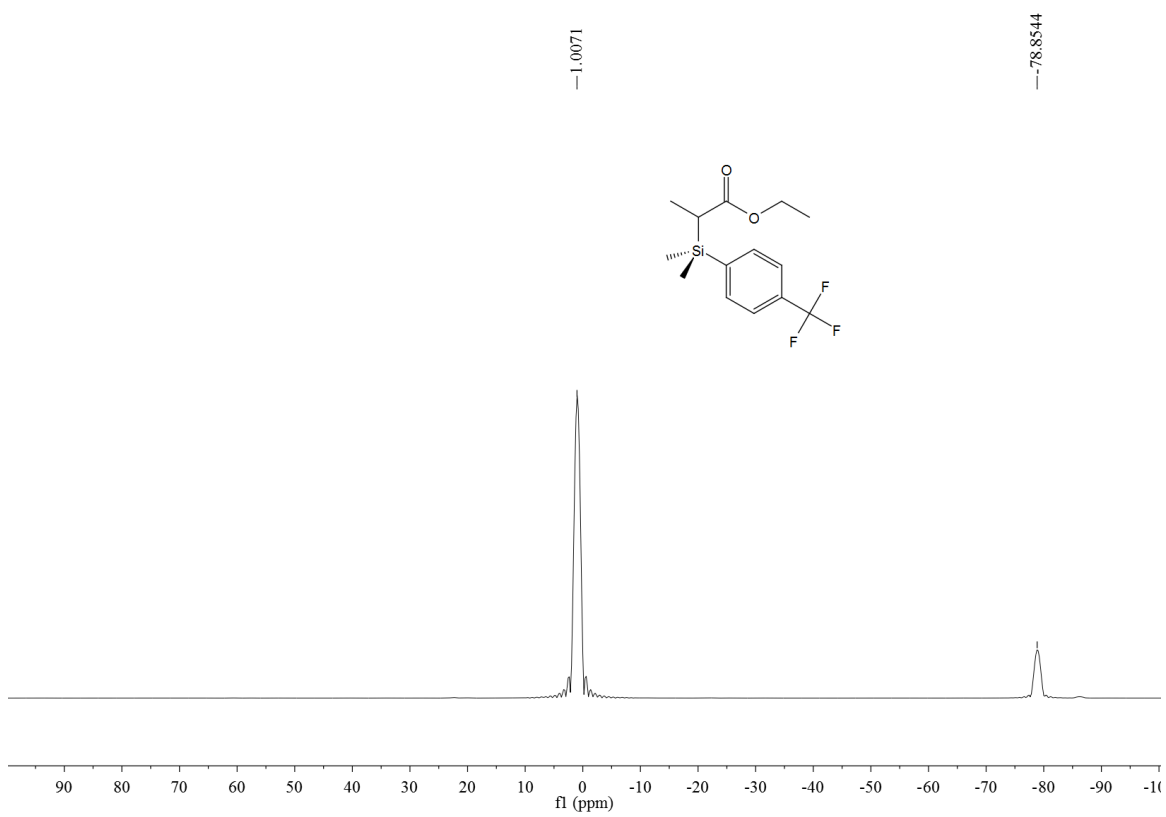

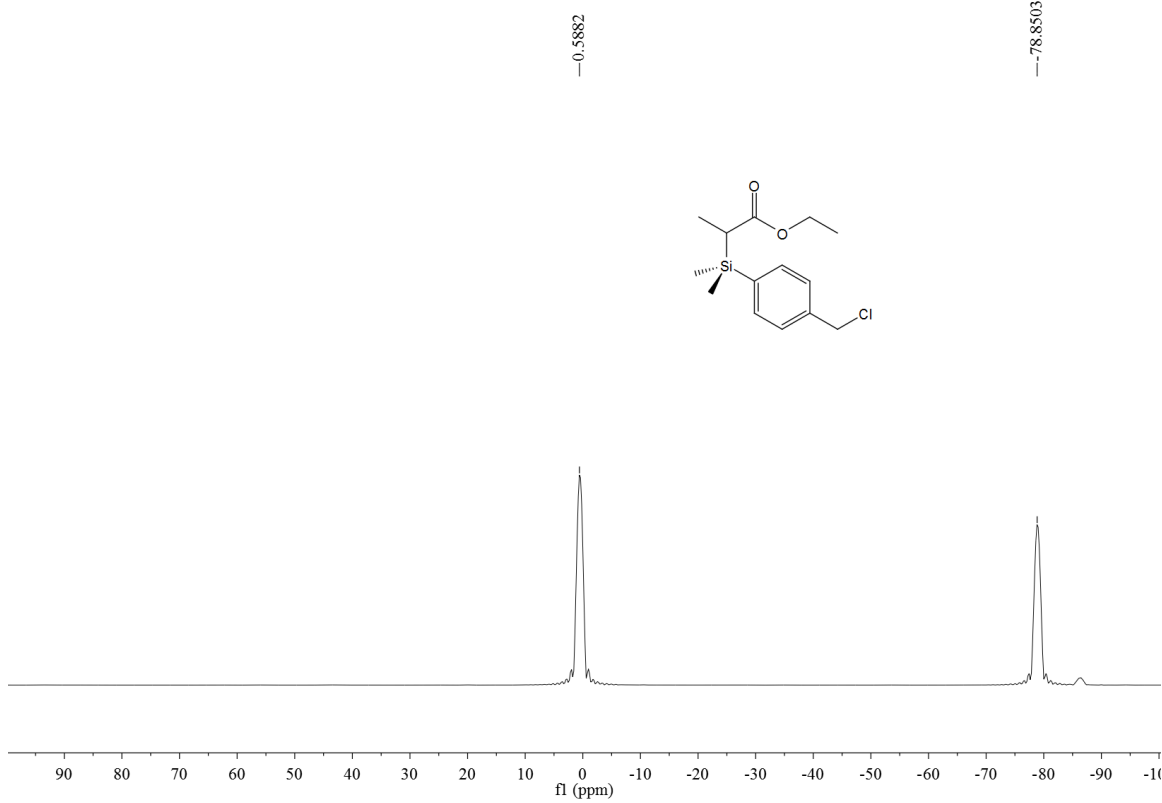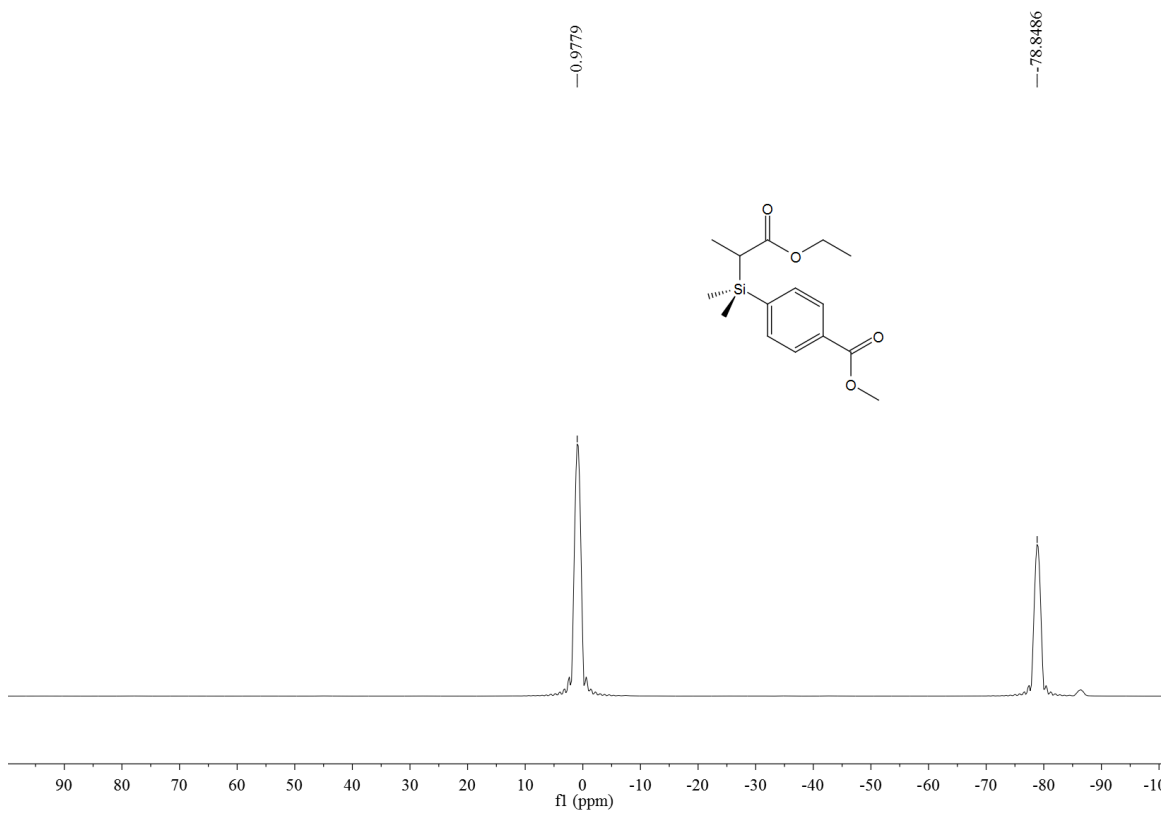



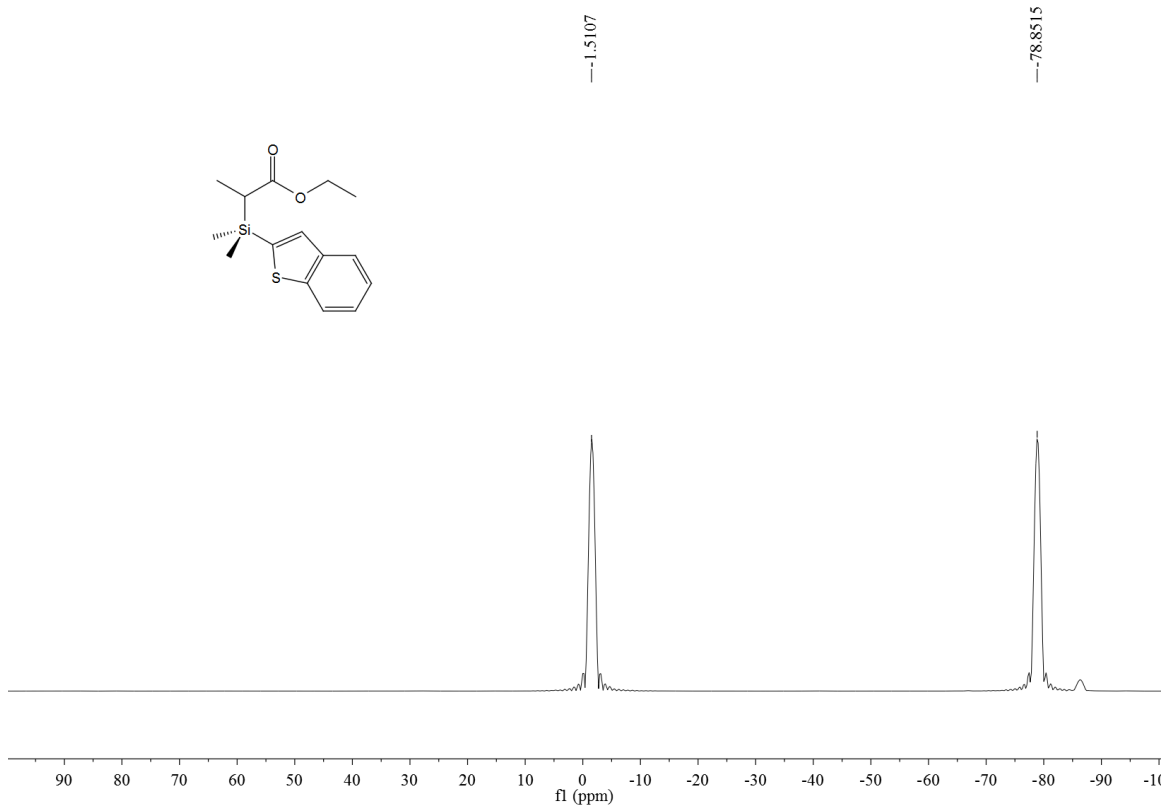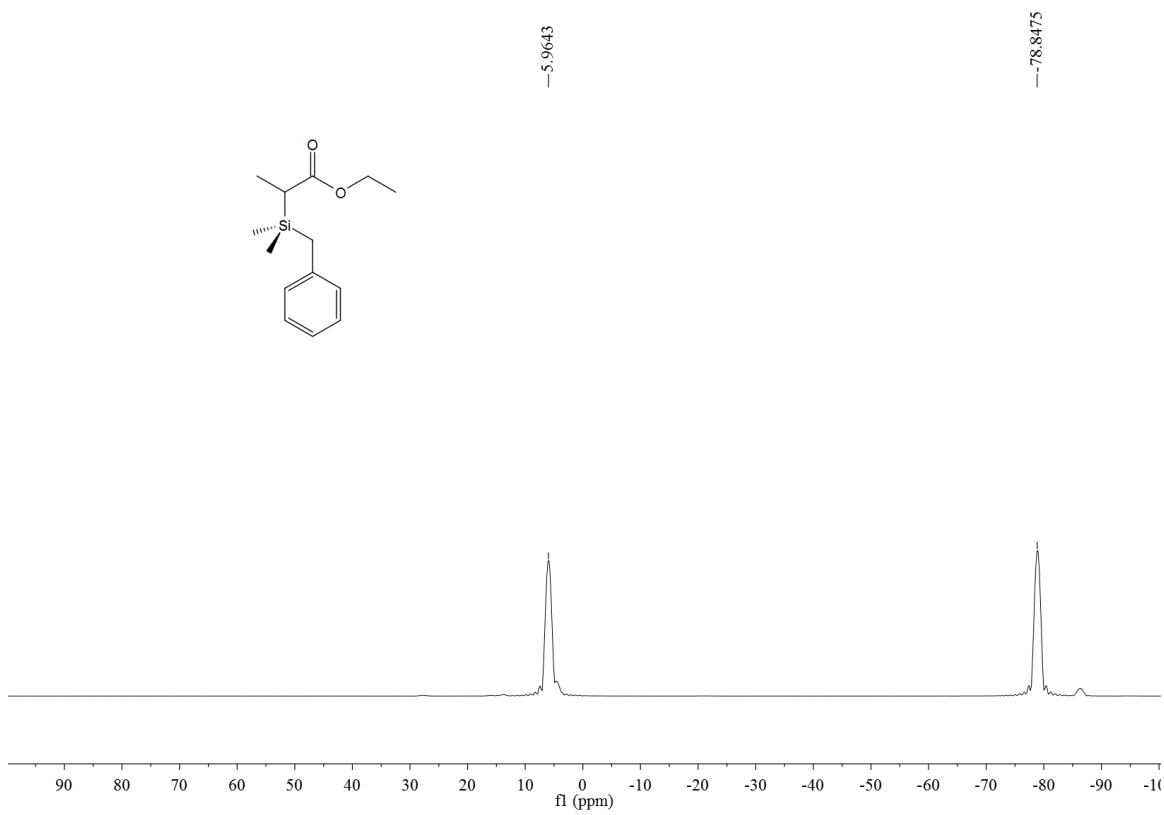

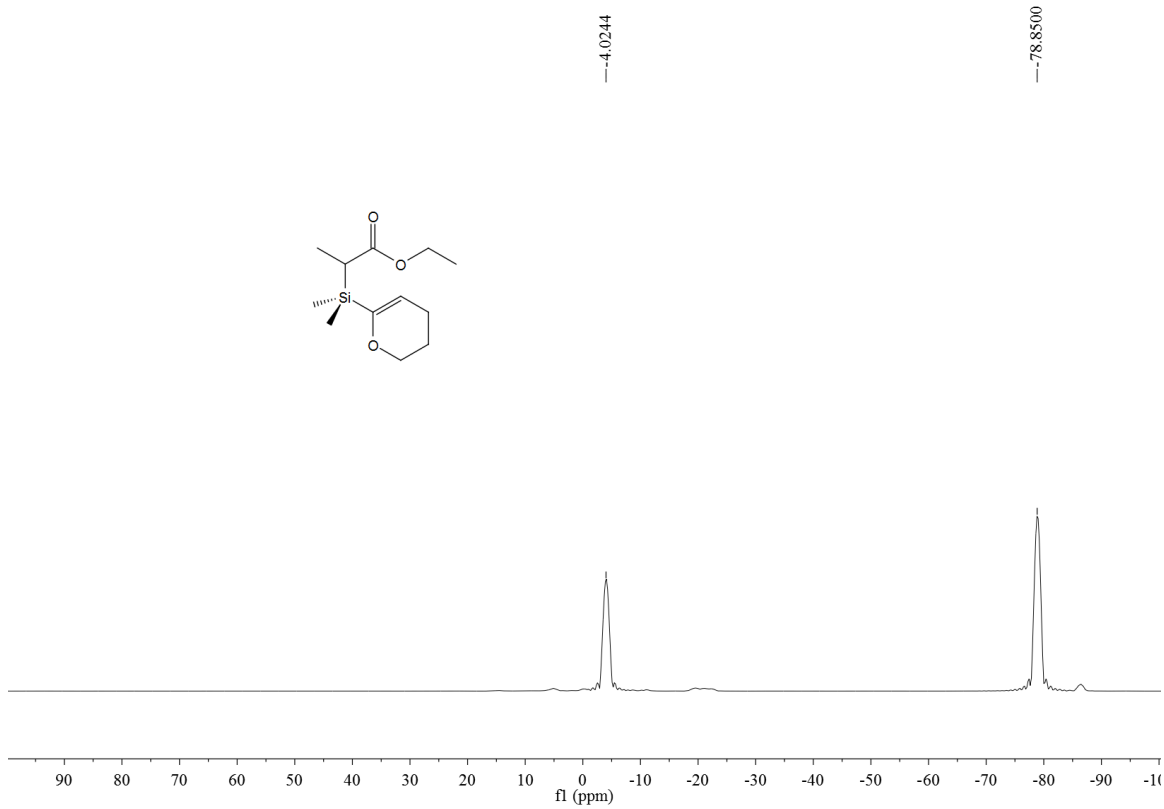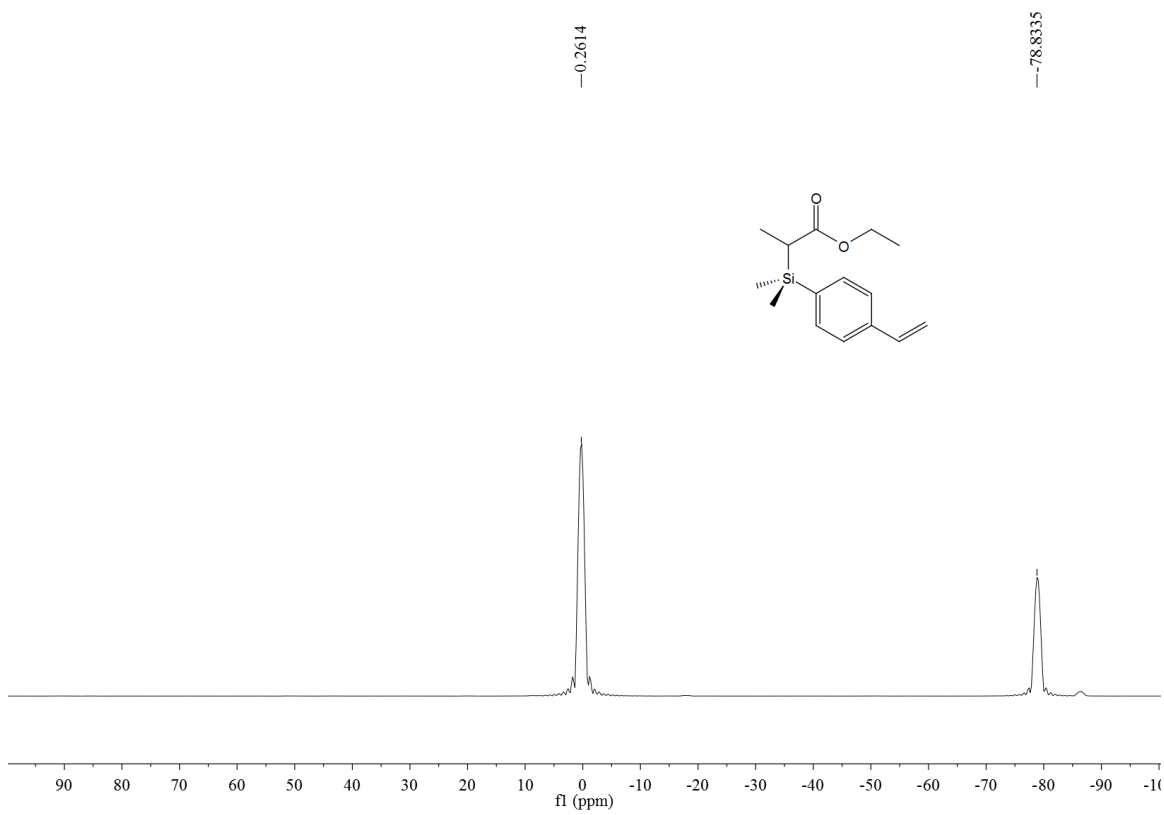

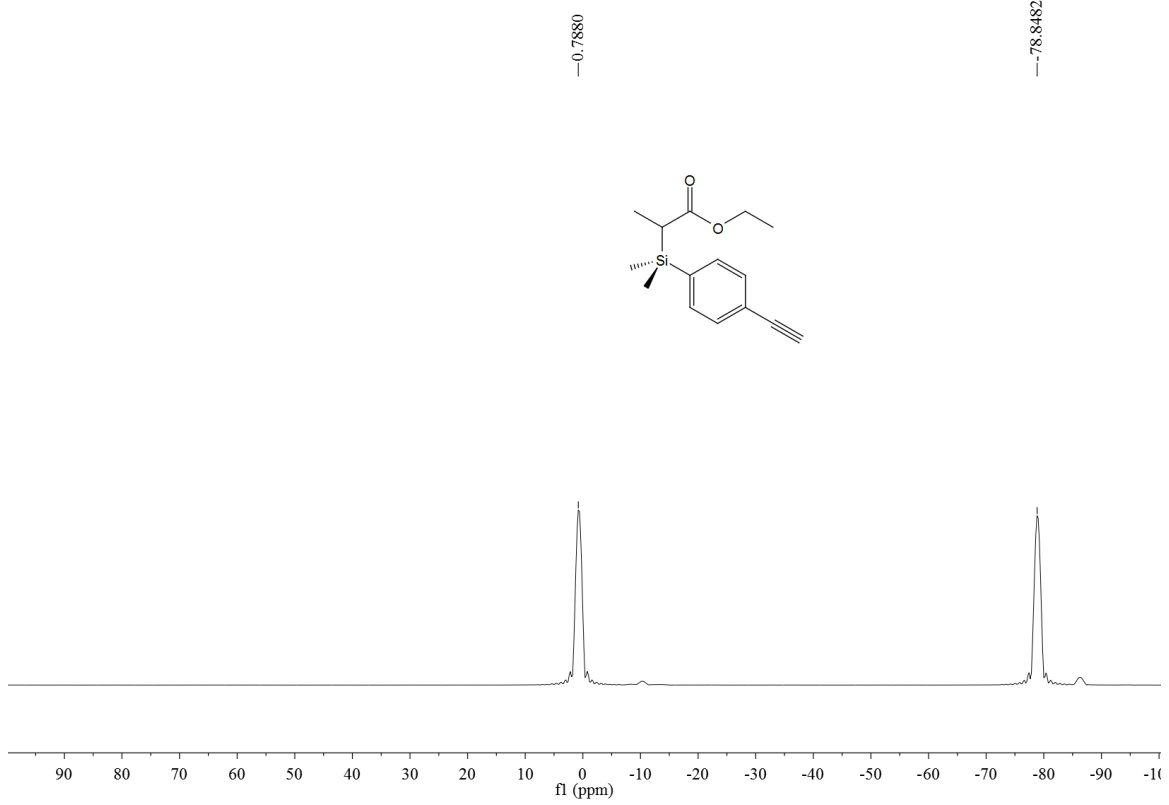

Supplement: NIHMS836028-supplement-Support_Info.pdf [file NIHMS836028-supplement-Support_Info.pdf]
